# Supplementary material
Source: publisher figshare collection journal article supplement (https://acs.figshare.com/ndownloader/files/4260349)
Supplement: Supplementary file 1 [file 4260349]

# Supporting Information

For

## Direct Entry to Erythronolides via a Cyclic Bis[Allene]

Kai Liu,<sup>a</sup> Hiyun Kim,<sup>a</sup> Partha Ghosh,<sup>a</sup> Novruz G. Akhmedov,<sup>b</sup> Lawrence J. Williams<sup>\*,a</sup>

<sup>a</sup>Department of Chemistry, Rutgers, The State University of New Jersey, 610 Taylor Rd, Piscataway, NJ 08854 and <sup>b</sup>C. Eugene Bennett Department of Chemistry, West Virginia University, 406 Clark Hall, Prospect Street, Morgantown, WV 26506, USA

## Table of Contents

|                                                                                           |             |
|-------------------------------------------------------------------------------------------|-------------|
| General Procedure                                                                         | S1          |
| Procedures and characterization data for <b>1-22</b>                                      | S2 – S16    |
| Detailed <sup>1</sup> H, <sup>13</sup> C, and selected NOE and HMBC data for <b>12-22</b> | S17 – S37   |
| NMR spectra for <b>1-22</b>                                                               | S38 – S114  |
| Crystal structure of compound <b>18</b>                                                   | S115 – S117 |
| Full citation for reference <b>6i-6k</b>                                                  | S118        |

**General Procedure:** Starting materials, reagents and solvents were purchased from commercial suppliers (Aldrich, Strem, TCI America and Ochem.) and used without further purification unless otherwise stated. All reactions were conducted in oven-dried (135 °C) glassware under an inert atmosphere of argon. The progress of reactions was monitored by silica gel thin layer chromatography (TLC) plates (mesh size 250 um with F-254 indicator, Dynamic Adsorbent), visualized under UV and charred using anisaldehyde or ceric ammonium molybdate (CAM) stain. Products were purified by flash column chromatography (FCC) on 120-400 mesh silica gel (Fisher). Infrared (FTIR) spectra were recorded on an ATI Mattson Genesis Series FTInfrared spectrophotometer. Proton nuclear magnetic resonance spectra (<sup>1</sup>H NMR) were recorded on either a Varian-600 instrument (600 MHz) or a Varian-500 instrument (500MHz). Chemical shifts are reported in ppm relative to residual CHCl<sub>3</sub> signal. Data is reported as follows: chemical shift, multiplicity (s=singlet, d=doublet, t=triplet, q=quartet, br=broad, m=multiplet), coupling constant (Hz), and integration. Carbon nuclear magnetic resonance spectra (<sup>13</sup>C NMR) were recorded on either a Varian-600 instrument (150 MHz) or a Varian-500 instrument (125 MHz). Mass spectra were recorded on a Finnigan LCQ-DUO mass spectrometer. Optical rotations were recorded at rt using the sodium D line (589 nm), on a Perkin Elmer 343 Polarimeter.

## Procedures and characterization data for 1-22

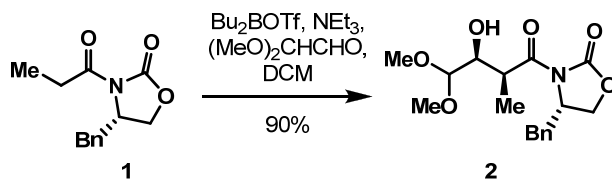

To a solution of 4(*S*)-benzyl *N*-propionyl oxazolidinone **1** (16.0 g, 68.6 mmol) in dichloromethane (DCM) (343 mL) was added dibutylboron triflate (75.0 mL, 75.0 mmol) and triethylamine (TEA) (9.72 g, 96.0 mmol) sequentially at  $-78\text{ }^\circ\text{C}$ . The reaction mixture was then warmed to  $0\text{ }^\circ\text{C}$  and stirred for 1 h then cooled back to  $-78\text{ }^\circ\text{C}$ . A DCM solution (1.0 M) of 1,1-dimethoxy acetaldehyde (100 mL, 100 mmol) was added to the reaction mixture slowly at  $-78\text{ }^\circ\text{C}$ . The mixture was slowly warmed to  $0\text{ }^\circ\text{C}$  over 1 h and then stirred for 1 h. The reaction was then quenched with 100 mL solution of methanol and pH=7.4 phosphate buffer (1:3 ratio) at  $0\text{ }^\circ\text{C}$ , followed by addition of 100 mL solution of 30%  $\text{H}_2\text{O}_2$  and methanol (1:2 ratio). The mixture was then stirred for 10 min at  $0\text{ }^\circ\text{C}$  then diluted with 200 mL DCM. The organic layer was separated, washed with water (2 x 100 mL), dried over anhydrous  $\text{Na}_2\text{SO}_4$ , filtered, and then concentrated under reduced pressure to give the crude product, which was purified by FCC using 40% ethyl acetate in hexane to afford aldol product **2** as white crystalline (20.9 g, 90% yield).  $[\alpha]_{\text{D}}^{25} = +50.0$  ( $c = 0.01$ ,  $\text{CHCl}_3$ ); M.P.  $67\text{ }^\circ\text{C}$ ; IR  $\nu_{\text{max}}(\text{neat})/\text{cm}^{-1}$  3485, 2937, 1778, 1696, 1386;  $^1\text{H}$  NMR (500 MHz,  $\text{CDCl}_3$ )  $\delta$  7.35-7.25 (m, 3H), 7.21 (d,  $J = 7.0$  Hz, 2H), 4.72-4.65 (m, 1H), 4.33 (d,  $J = 6.0$  Hz, 1H), 4.23- 4.15 (m, 2H), 4.05-3.96 (m, 1H), 3.42 (s, 3H), 3.38 (s, 3H), 3.26 (dd,  $J = 13.5, 3.5$  Hz, 1H), 2.78 (dd,  $J = 13.5, 10$  Hz, 1H), 2.68-2.60 (bs, 1H), 1.32 (d,  $J = 7.0$  Hz, 3H);  $^{13}\text{C}$  NMR (125 MHz,  $\text{CDCl}_3$ )  $\delta$  176.1, 153.2, 135.4, 129.6 (2), 129.1 (2), 127.5, 104.9, 71.4, 66.3, 55.4, 54.9, 54.4, 39.2, 38.1, 12.8; MS (ESI+) calculated for  $[\text{C}_{17}\text{H}_{23}\text{NO}_6 + \text{Na}]^+$ : 360.2, found: 360.2

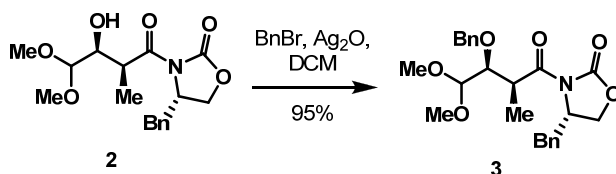

Powdered  $4\text{ \AA}$  molecular sieves (20.0 g) and  $\text{Ag}_2\text{O}$  (35.0 g, 151 mmol) were combined under inert atmosphere (glove bag) and then taken up in anhydrous DCM (150 mL) followed by addition of **2** (17.0 g, 50.4 mmol) in anhydrous DCM (100 mL). After stirring for 10 min at room temperature

(rt) BnBr (18.5 g, 108 mmol) was added to this heterogeneous mixture. The system was then wrapped in aluminum foil and stirred for 2 days under inert atmosphere in the dark at rt. The mixture was then filtered over celite and the solid residue was rinsed with DCM (3 x 100 mL). The organic filtrate was concentrated under reduced pressure to give crude product, which was purified by FCC using 20% ethyl acetate in hexane to afford **3** as a colorless oil (20.4 g, 95% yield).  $[\alpha]_D^{25} = +21.0$  ( $c = 0.01$ ,  $\text{CHCl}_3$ ); IR  $\nu_{\text{max}}(\text{neat})/\text{cm}^{-1}$  2934, 1778, 1698, 1383, 1107;  $^1\text{H}$  NMR (500 MHz,  $\text{CDCl}_3$ )  $\delta$  7.39-7.23 (m, 8H), 7.19 (d,  $J = 7.0$  Hz, 2H), 4.81 (d,  $J = 11.5$  Hz, 1H), 4.64 ( $J = 11.5$  Hz, 1H), 4.59-4.53 (m, 1H), 4.34 (d,  $J = 6.0$  Hz, 1H), 4.14-4.03 (m, 3H), 3.84 (dd,  $J = 7.5$ , 6.5 Hz, 1H), 3.43 (s, 3H), 3.34 (s, 3H), 3.24 (dd,  $J = 13.5$ , 3.5 Hz, 1H), 2.75 (dd,  $J = 13.5$ , 9.5 Hz, 1H), 1.31 (d,  $J = 7.0$  Hz, 3H);  $^{13}\text{C}$  NMR (125 MHz,  $\text{CDCl}_3$ )  $\delta$  175.2, 153.3, 138.6, 135.5, 129.6 (2), 129.0 (2), 128.4 (2), 128.2 (2), 127.8, 127.4, 107.0, 79.8, 74.4, 66.1, 55.5, 55.4, 55.2, 39.5, 38.1, 13.8; MS (ESI+) calculated for  $[\text{C}_{24}\text{H}_{29}\text{NO}_6 + \text{Na}]^+$ : 450.2, found: 450.2;

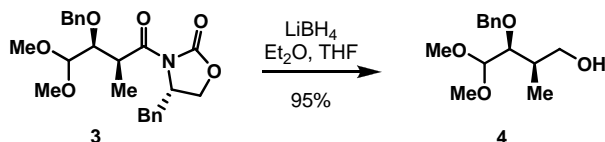

To a solution of **3** (17.8 g, 41.6 mmol) in diethyl ether (200 mL) was added methanol (5 mL). The reaction mixture was cooled to 0 °C and then  $\text{LiBH}_4$  [33.2 mL of 2.5 M solution in tetrahydrofuran (THF) 83.0 mmol] was added slowly under argon. The resulting solution was stirred at 0 °C for 2 h then quenched with aqueous  $\text{NH}_4\text{Cl}$  (50 mL) and extracted with ethyl acetate (3 x 200 mL). The organic layer was separated, dried over anhydrous  $\text{Na}_2\text{SO}_4$ , filtered and then concentrated under reduced pressure to give crude product, which was purified by FCC using 15% ethyl acetate in hexane to afford **4** as colorless oil (10.1 g, 95% yield).  $[\alpha]_D^{25} = -33.0$  ( $c = 0.01$ ,  $\text{CHCl}_3$ ); IR  $\nu_{\text{max}}(\text{neat})/\text{cm}^{-1}$  3431, 2934, 1454, 1071;  $^1\text{H}$  NMR (500 MHz,  $\text{CDCl}_3$ )  $\delta$  7.38-7.32 (m, 4H), 7.30-7.25 (m, 2H), 4.82 (d,  $J = 11.5$  Hz, 1H), 4.58 (d,  $J = 11.5$  Hz, 1H), 4.39 (d,  $J = 6.5$  Hz, 1H), 3.59 (dd,  $J = 6.0$ , 3.5 Hz, 1H), 3.59-3.46 (m, 2H), 3.49 (s, 3H), 3.41 (s, 3H), 2.02-1.96 (m, 1H), 1.90 (bs, 1H), 0.94 (d,  $J = 7.0$  Hz, 3H);  $^{13}\text{C}$  NMR (125 MHz,  $\text{CDCl}_3$ )  $\delta$  138.9, 128.5 (2), 128.2 (2), 127.8, 106.5, 79.6, 74.1, 65.8, 56.2, 54.6, 36.9, 11.4; MS (ESI+) calculated for  $[\text{C}_{14}\text{H}_{22}\text{O}_4 + \text{Na}]^+$ : 277.2, found: 277.2.

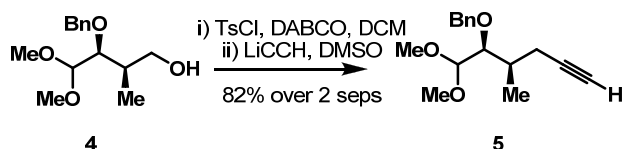

To a solution of **4** (7.30 g, 28.7 mmol) in DCM (150 mL) was added DABCO (3.22 g, 28.7 mmol). The reaction mixture was cooled to 0 °C and then tosyl chloride (5.47 g, 28.7 mmol) was added. The resulting solution was warmed to rt, stirred for 1 h, then diluted with 150 mL of DCM, washed with saturated NH<sub>4</sub>Cl (3 x 50 mL) and water (50 mL). The organic layer was separated, dried over anhydrous Na<sub>2</sub>SO<sub>4</sub>, filtered, and concentrated under reduced pressure to give crude tosylate, which was taken on without further purification as described below.

The above tosylate was dissolved in anhydrous DMSO (70 mL), and then lithium acetylide-ethylenediamine (4.76 g, 52.9 mmol) solution in DMSO (30 mL) was added. The resulting mixture was stirred for 3 h at rt, then cooled to 10 °C then carefully quenched with aqueous NH<sub>4</sub>Cl (50 mL) such that the temperature of the solution was maintained below 20 °C. The quenched solution was then diluted with ethyl acetate (300 mL) and washed with water (3 x 100 mL). The organic layer was separated, dried over anhydrous Na<sub>2</sub>SO<sub>4</sub>, filtered, and then concentrated under reduced pressure to give crude product, which was purified by FCC using 3% ethyl acetate in hexane to afford **5** as colorless oil (5.95 g, 82% yield).  $[\alpha]_D^{25} = -39.0$  ( $c = 0.01$ , CHCl<sub>3</sub>); IR  $\nu_{\max}(\text{neat})/\text{cm}^{-1}$  3295, 2935, 2116, 1096; <sup>1</sup>H NMR (500 MHz, CDCl<sub>3</sub>)  $\delta$  7.38-7.30 (m, 4H), 7.28-7.22 (m, 1H), 4.68 (d,  $J = 11.5$  Hz, 1H), 4.56 (d,  $J = 11.5$  Hz, 1H), 4.36 (d,  $J = 7.0$  Hz, 1H), 3.65 (dd,  $J = 7.0, 3.0$  Hz, 1H), 3.47 (s, 3H), 3.38 (s, 3H), 2.23- 2.12 (m, 2H), 2.10- 2.00 (m, 2H), 1.96 (t,  $J = 7.5$  Hz, 1H), 0.98 (d,  $J = 7.0$  Hz, 3H); <sup>13</sup>C NMR (125 MHz, CDCl<sub>3</sub>)  $\delta$  139.3, 128.4 (2), 127.9 (2), 127.6, 106.4, 83.7, 80.3, 74.8, 69.6, 56.0, 53.8, 34.4, 23.5, 14.0; MS (ESI+) calculated for [C<sub>16</sub>H<sub>22</sub>O<sub>3</sub>+Na]<sup>+</sup>: 285.1, found: 285.2.

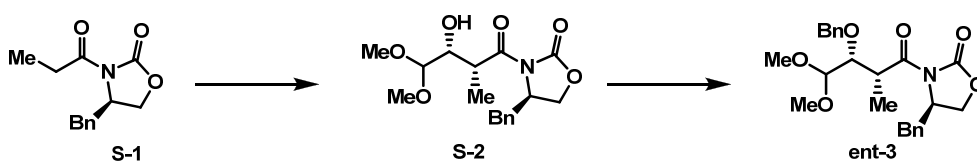

Compound **S-2** and **ent-3** were prepared following the same procedure used for the synthesis of their antipods **2** and **3** respectively. The observed optical rotation ( $[\alpha]_D^{25}$ ) for the compound **S-2** and **ent-3** are  $-50.0$  ( $c = 0.01$ , CHCl<sub>3</sub>), and  $-21.0$  ( $c = 0.01$ , CHCl<sub>3</sub>) respectively.

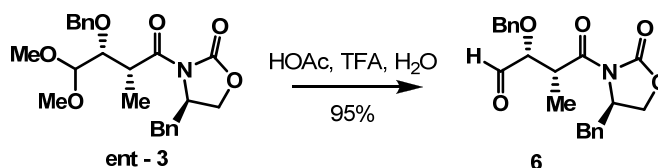

*Ent-3* (1.00 g, 2.34 mmol) was dissolved in 10 mL water: acetic acid:trifluoroacetic acid = 1:4:1 mixed solution at rt for 3 h and 30 mins. The acidic solvent was azeotropically removed with toluene (5 x 20 mL) under reduced pressure and the resulting crude product was taken on without further purification as described below. It could also be further purified by FCC using 15% ethyl acetate in hexane to afford **6** as colorless viscous oil (847 mg, 95% yield).  $[\alpha]_D^{25} = -30.0$  ( $c = 0.01$ ,  $\text{CHCl}_3$ ); IR  $\nu_{\text{max}}(\text{neat})/\text{cm}^{-1}$  1778, 1730, 1693, 1390, 1212;  $^1\text{H}$  NMR (500 MHz,  $\text{CDCl}_3$ )  $\delta$  9.81 (s, 1H), 7.38-7.22 (m, 8H), 7.17 (d,  $J = 7.0$  Hz, 2H), 4.75 (d,  $J = 12.5$  Hz, 1H), 4.64-4.54 (m, 1H), 4.59 (d,  $J = 12.5$  Hz, 1H), 4.32-4.24 (m, 1H), 4.16-4.06 (m, 2H), 3.92 (d,  $J = 6.0$  Hz, 1H), 3.20 (dd,  $J = 13.5, 3.5$  Hz, 1H), 2.76 (dd,  $J = 13.5, 10$  Hz, 1H), 1.33 (d,  $J = 7.0$  Hz, 3H);  $^{13}\text{C}$  NMR (125 MHz,  $\text{CDCl}_3$ )  $\delta$  202.0, 173.8, 153.1, 137.2, 135.1, 129.6 (2), 129.1 (2), 128.7 (2), 128.4, 128.3 (2), 127.5, 83.3, 73.1, 66.4, 55.4, 41.5, 37.8, 13.4; MS (ESI+) calculated for  $[\text{C}_{22}\text{H}_{23}\text{NO}_5 + \text{Na}]^+$ : 404.2, found: 404.2.

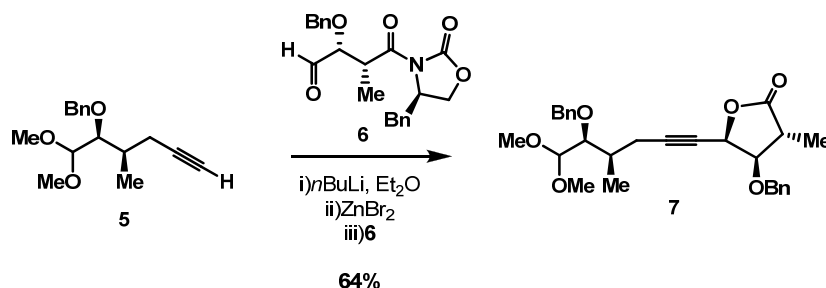

A solution of alkyne **5** (2.04 g, 7.76 mmol) in diethyl ether (40 mL) was cooled to  $-78$  °C and then *n*-BuLi (3.10 mL, 7.76 mmol) was added slowly. The reaction mixture was stirred at  $-78$  °C for 1 h and then a solution of  $\text{ZnBr}_2$  (1.75 g, 7.76 mmol) in diethyl ether (20 mL) was added. The resulting milky white solution was stirred for 10 mins at  $-78$  °C then warmed to  $0$  °C and then a solution of above aldehyde **6** (0.804 g, 2.1 mmol) in diethyl ether (15 mL) was added drop wise using a syringe pump for 2 h. The solution was then stirred for another 4 h then quenched with aqueous  $\text{NH}_4\text{Cl}$  (50 mL) at  $0$  °C, diluted with ethyl acetate (200 mL) and washed with water (2 x 50 mL). The organic layer was separated, dried over anhydrous  $\text{Na}_2\text{SO}_4$ , filtered, and then concentrated under reduced pressure to give the crude product (8:1 ratio by  $^1\text{H}$  NMR), which was purified by FCC using 10% ethyl acetate in hexane to afford major isomer of **7** as colorless oil (570 mg, 58% yield).  $[\alpha]_D^{25} = +18.0$  ( $c = 0.01$ ,  $\text{CHCl}_3$ ); IR  $\nu_{\text{max}}(\text{neat})/\text{cm}^{-1}$  2935, 2238, 1786, 1454;  $^1\text{H}$  NMR (500 MHz,  $\text{CDCl}_3$ )  $\delta$  7.38-7.24 (m, 10H), 5.12 (td,  $J = 2.0$  Hz, 6.5 Hz, 1H), 4.82 (d,  $J = 11.5$  Hz, 1H), 4.72 (d,  $J = 12.0$  Hz, 1H), 4.53 (d,  $J = 11.5$  Hz, 1H), 4.51 (d,  $J = 11.5$  Hz, 1H), 4.35 (d,  $J = 6.9$  Hz, 1H), 3.88 (dd,  $J = 9.5, 6.5$  Hz, 1H), 3.57 (dd,  $J = 10.0, 7.0$  Hz, 1H), 3.47 (s,

3H), 3.37 (s, 3H), 2.86-2.76 (m, 1H), 2.38-2.20 (m, 2H), 2.10-2.00 (m, 1H), 1.25 (d,  $J = 7.0$  Hz, 3H), 0.99 (d,  $J = 7.0$  Hz, 3H);  $^{13}\text{C}$  NMR (125 MHz,  $\text{CDCl}_3$ )  $\delta$  176.0, 139.1, 137.1, 128.8 (2), 128.5 (2), 128.4, 128.1 (2), 127.9 (2), 127.7, 106.4, 90.5, 81.0, 80.5, 74.7, 73.9, 72.4, 70.5, 56.1, 54.1, 39.4, 34.4, 24.0, 14.0, 12.7; MS (ESI+) calculated for  $[\text{C}_{28}\text{H}_{34}\text{O}_6+\text{Na}]^+$ : 489.3, found: 489.2.

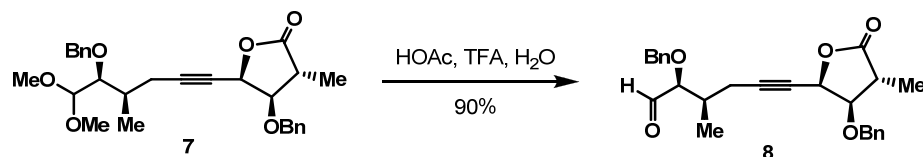

Alkyne **7** (280 mg, 0.600 mmol) was dissolved in 20 mL mixed solution of acetic acid, TFA and water (4:1:1) at rt and stirred for 14 h. The acidic solvent was removed with toluene (5 x 100 mL) under reduced pressure to afford the crude product, which was taken on without further purification as described below. It could also be further purified by FCC using 12% ethyl acetate in hexane to afford **8** as colorless viscous oil (227 mg, 90% yield).  $[\alpha]_{\text{D}}^{25} = +22.0$  ( $c = 0.01$ ,  $\text{CHCl}_3$ ); IR  $\nu_{\text{max}}(\text{neat})/\text{cm}^{-1}$  2935, 2240, 1786, 1730, 1455;  $^1\text{H}$  NMR (500 MHz,  $\text{CDCl}_3$ )  $\delta$  9.65 (s, 1H), 7.4-7.25 (m, 10H), 5.11 (d,  $J = 6$  Hz, 1H), 4.67 (d,  $J = 13$  Hz, 2H), 4.54 (d,  $J = 11.5$  Hz, 1H), 4.46 (d,  $J = 12$  Hz, 1H), 3.95-3.85 (m, 2H), 2.85-2.75 (m, 1H), 2.48-2.26 (m, 2H), 2.26-2.16 (m, 1H), 1.27 (d,  $J = 7.0$  Hz, 3H), 1.01 (d,  $J = 6.5$  Hz, 3H);  $^{13}\text{C}$  NMR (125 MHz,  $\text{CDCl}_3$ )  $\delta$  204.3, 175.9, 137.6, 137.1, 128.8 (2), 128.7 (2), 128.5, 128.3, 128.2 (2), 128.0 (2), 89.2, 85.1, 81.0, 74.9, 73.4, 72.4, 70.4, 39.4, 35.2, 23.1, 14.5, 12.7; MS (ESI+) calculated for  $[\text{C}_{26}\text{H}_{28}\text{O}_5+\text{Na}]^+$ : 443.2, found: 443.2.

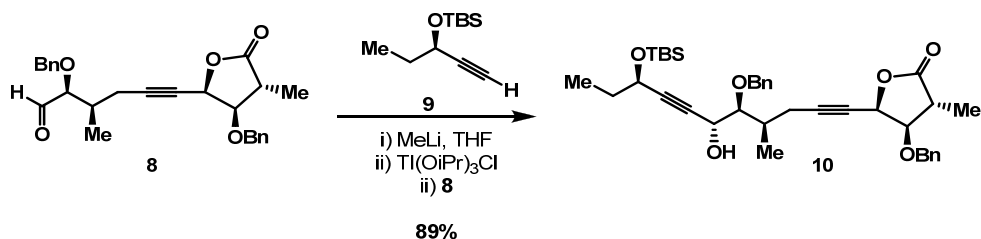

A solution of **9** (594 mg, 3.00 mmol) in THF (25 mL) was cooled to  $-78^\circ\text{C}$  and then a solution of MeLi in diethyl ether (1.4 mL, 2.25 mmol) was added slowly. (The preparation of compound **9** can be found in the supporting information of: Ghosh, P.; Lotesta, S. D.; Williams, L. J. *J. Am. Chem. Soc.* **2007**, *129*, 2438.) The reaction mixture was stirred for 1 h and then a 1 M hexane solution of chlorotriisopropoxytitanium (IV) (3.00 mL, 3.00 mmol) was added. The solution was slowly warmed to  $-40^\circ\text{C}$  and then a solution of aldehyde **8** (315 g, 0.749 mmol) in THF (10 mL) was added slowly at  $-40^\circ\text{C}$ . The mixture was warmed slowly to  $-20^\circ\text{C}$  over 2 h, diluted with ethyl



and the resulting crude product was purified by FCC using 50% ethyl acetate in hexane to afford **11** as colorless oil (1.14 g, 88% yield).  $[\alpha]_D^{25} = +45.0$  ( $c = 0.01$ ,  $\text{CHCl}_3$ ); IR  $\nu_{\text{max}}(\text{neat})/\text{cm}^{-1}$  3388, 2933, 1965, 1710, 1454;  $^1\text{H}$  NMR (500 MHz,  $\text{CDCl}_3$ )  $\delta$  7.36-7.27 (m, 10H), 5.18-5.10 (m, 1H), 5.08-5.02 (m, 1H), 4.70 (d,  $J = 11.5$  Hz, 1H), 4.68 (d,  $J = 12.0$  Hz, 1H), 4.45 (d,  $J = 11.5$  Hz, 1H), 4.41 (d,  $J = 12.0$  Hz, 1H), 4.04 (dd,  $J = 7.0, 7.0$  Hz, 1H), 3.99 (t,  $J = 6.5$  Hz, 1H), 3.69 (dd,  $J = 8.5, 5$  Hz, 1H), 2.84-2.76 (m, 1H), 2.38-2.32 (m, 1H), 1.94-1.84 (m, 1H), 1.75 (d,  $J = 3$  Hz, 3H), 1.67 (d,  $J = 2.5$  Hz, 3H), 1.66-1.50 (m, 2H), 1.23 (d,  $J = 7$  Hz, 3H), 0.98 (d,  $J = 6.5$  Hz, 3H), 0.90 (t,  $J = 7$  Hz, 3H);  $^{13}\text{C}$  NMR (125 MHz,  $\text{CDCl}_3$ )  $\delta$  203.6, 201.7, 175.7, 138.9, 137.7, 128.7 (2), 128.5 (2), 128.1, 128.1 (2), 127.8 (2), 127.7, 103.4, 100.6, 92.5, 88.0, 82.1, 79.3, 74.2, 70.7, 70.4, 44.4, 37.6, 37.0, 27.9, 19.4, 15.4, 15.1, 13.3, 9.8; MS (ESI+) calculated for  $[\text{C}_{33}\text{H}_{42}\text{O}_5 + \text{Na}]^+$ : 541.3, found: 541.3.

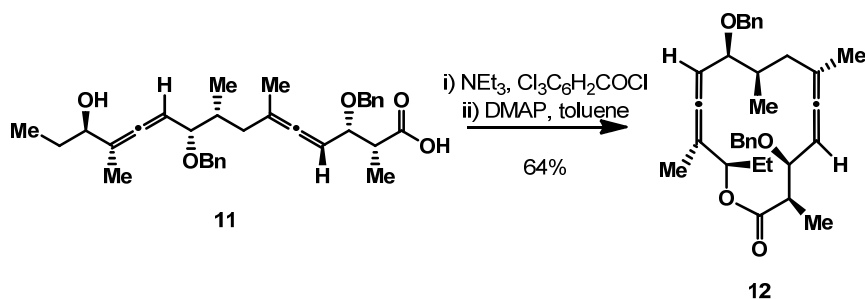

Seco acid **11** (280 mg, 0.540 mmol) was taken up in 20 mL toluene, then triethylamine (273 mg, 2.7 mmol) and 2,4,6-trichlorobenzoyl chloride (658 mg, 2.7 mmol) were added at rt. The reaction mixture was then stirred for 6 h at rt. The resulting solution was delivered dropwise by syringe pump over 2 h into a solution of DMAP (659 mg, 5.40 mmol) in toluene (150 mL) at 80 °C. The mixture was then cooled to rt and quenched with aqueous  $\text{NH}_4\text{Cl}$  (100 mL). The organic layer was separated, washed with water (2 x 100 mL), dried over anhydrous  $\text{Na}_2\text{SO}_4$ , filtered, and then concentrated under reduced pressure to give the crude product which upon FCC purification using 5% ethyl acetate in hexanes to afford macrolactone **12** (172 mg, 64% yield) as a colorless oil. IR  $\nu_{\text{max}}(\text{neat})/\text{cm}^{-1}$  2970, 1961, 1731, 1454, 1248;  $^1\text{H}$  NMR (500 MHz,  $\text{CDCl}_3$ )  $\delta$  7.35-7.22 (m, 10H), 5.33 (m, 1H), 5.26 (dt,  $J = 6.8, 1.1$  Hz, 1H), 5.13 (m, 1H), 4.64 (d,  $J = 11.7$  Hz, 1H), 4.54 (d,  $J = 11.9$  Hz, 1H), 4.48 (d,  $J = 11.7$  Hz, 1H), 4.34 (d,  $J = 11.9$  Hz, 1H), 3.95 (dd,  $J = 8.4, 4.0$  Hz, 1H), 3.74 (dd,  $J = 7.8, 7.2$  Hz, 1H), 2.78 (dq,  $J = 8.4, 7.1$  Hz, 1H), 2.18 (m, 1H), 1.96 (m, 1H), 1.71 (d,  $J = 2.9$  Hz, 3H), 1.70 (d,  $J = 2.9$  Hz, 3H), 1.69-1.67 (m, 2H), 1.61 (m, 1H), 1.26 (d,  $J = 7.1$  Hz, 3H), 1.05 (d,  $J = 6.7$  Hz, 3H), 0.90 (t,  $J = 7.5$  Hz, 3H);  $^{13}\text{C}$  NMR (125 MHz,  $\text{CDCl}_3$ )  $\delta$  203.7, 201.4,



174.1, 139.3, 138.8, 128.5, 128.4, 128.0, 127.9, 127.7, 127.5, 102.6, 99.2, 92.0, 90.8, 81.8, 77.0, 75.7, 70.7, 68.9, 45.2, 37.9, 36.1, 25.2, 20.4, 15.5, 14.3, 9.9; MS (ESI+) calculated for  $[C_{33}H_{40}O_4+Na]^+$ : 523.3, found: 523.3.

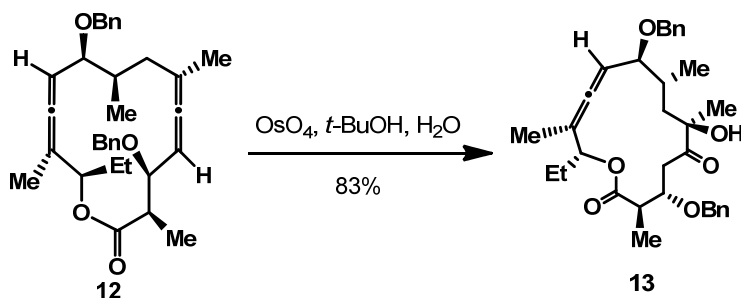

The macro lactone **12** (26 mg, 0.052mmol) was dissolved in 2 mL 1:1 mixture of  $t\text{-BuOH}$  and water. To this solution was added  $OsO_4$  (0.50 mL, 4% wt. water solution, 0.078mmol) at rt, stirred for 45 min then quenched by 20 mL saturated sodium sulfite solution, extracted with diethyl ether (2 x 20 mL). The organic layer was separated, dried over  $Na_2SO_4$ , filtered, and then concentrated under reduced pressure to give the crude product, which was purified by FCC using 10% ethyl acetate in hexane to afford the macro lactone **13** as a light yellowish oil (23 mg, 0.043 mmol, 83% yield): IR  $\nu_{\max}(\text{neat})/\text{cm}^{-1}$  3475, 2930, 2872, 1966, 1739, 1496, 1455, 1370;  $^1H$  NMR (500 MHz,  $CDCl_3$ )  $\delta$  7.26-7.38 (m, 10H), 5.15 (m, 1H), 4.94 (m, 1H), 4.74 (d,  $J = 11.6$  Hz, 1H), 4.60 (d,  $J = 12.2$  Hz, 1H), 4.56 (d,  $J = 11.6$  Hz, 1H), 4.34 (d,  $J = 12.2$  Hz, 1H), 4.15 (m, 1H), 3.44 (dd,  $J = 6.8$ , 8.1 Hz, 1H), 2.96 (dd,  $J = 6.9$ , 17.7 Hz, 1H), 2.93 (dd,  $J = 3.8$ , 17.7 Hz, 1H), 2.58 (m, 1H), 1.9 (dd,  $J = 6.6$ , 15.1 Hz, 1H), 1.79 (d,  $J = 2.9$  Hz, 1H), 1.73 (m, 1H), 1.69 (m, 2H), 1.54 (dd,  $J = 3.2$ , 15.1 Hz, 1H), 1.32 (s, 3H), 1.30 (d,  $J = 6.8$  Hz, 3H), 1.05 (d,  $J = 6.8$  Hz, 3H), 0.90 (t,  $J = 7.4$  Hz, 3H).  $^{13}C$  NMR (126 MHz,  $CDCl_3$ )  $\delta$  212.1, 204.0, 173.8, 138.6, 138.4, 128.6, 128.5, 128.1, 127.9, 127.7, 126.1, 99.8, 96.7, 82.3, 78.9, 76.5, 76.0, 73.8, 70.0, 45.6, 43.0, 42.6, 34.2, 27.4, 25.3, 18.6, 15.5, 13.7, 9.6; MS (ESI+) calculated for  $[C_{33}H_{42}O_6+Na]^+$ : 557.3, found: 557.3.  $[\alpha]_D^{25} = -32.6^\circ$  ( $c = 0.004$ ,  $CHCl_3$ )

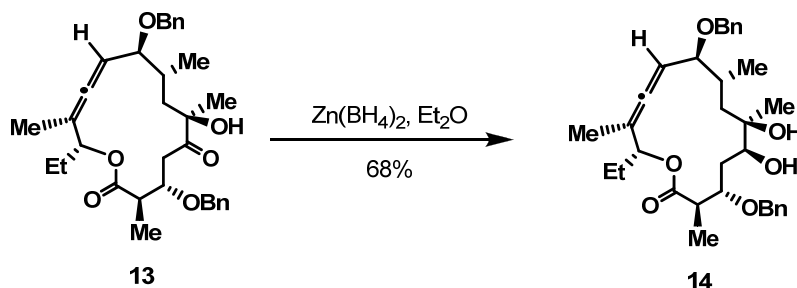

The hydroxyl ketone **13** (8.0 mg, 0.015 mmol) was dissolved in 1 mL anhydrous diethyl ether, cooled to 0 °C, then a 0.1 M solution of zinc borohydride (1 mL, 0.1 mmol) was added, stirred for 30 min then quenched with saturated NH<sub>4</sub>Cl aqueous solution and extracted with ethyl acetate. The organic layer was dried over Na<sub>2</sub>SO<sub>4</sub>, filtered, and then concentrated under reduced pressure to give a crude product which was purified by FCC using 20% ethyl acetate in hexane to afford **14** as a colorless oil (5.4 mg, 0.010mmol, 68% yield) as product: IR  $\nu_{\text{max}}$  (neat)/cm<sup>-1</sup> 3454, 2968, 2933, 2875, 1729, 1455, 1371, 1182, 1067; <sup>1</sup>H NMR (600 MHz, CDCl<sub>3</sub>)  $\delta$  7.37-7.27 (m, 10H), 5.38 (m, 1H), 5.21 (m, 1H), 4.74 (d, *J* = 12.3 Hz, 1H), 4.60 (d, *J* = 11.1, 1H), 4.59 (d, *J* = 11.1, 1H), 4.42 (d, *J* = 12.3 Hz, 1H), 3.92 (m, 1H), 3.69 (dd, *J* = 7.5, 5.5 Hz, 1H), 3.59 (m, 1H), 2.89 (s, 1H), 2.76 (dq, *J* = 7.2, 6.9 Hz, 1H), 2.06 (m, 1H), 1.99 (dd, *J* = 14.8, 5.3 Hz, 1H), 1.86 (dd, *J* = 15.0, 3.4 Hz, 1H), 1.83 (dd, *J*=15.0, 7.1 Hz, 1H), 1.74 (d, *J* = 3.0 Hz, 3H), 1.72 (m, 2H), 1.24 (d, *J* = 6.9 Hz, 3H), 1.16 (s, 3H), 1.07 (dd, *J* = 14.8, 3.8 Hz, 1H), 1.00 (d, *J* = 6.9 Hz, 3H), 0.91 (t, *J* = 7.3 Hz, 3H); <sup>13</sup>C NMR (150 MHz, CDCl<sub>3</sub>)  $\delta$  204.2, 174.8, 138.3, 138.0, 128.7, 128.6, 128.2, 128.1(2), 127.8, 99.5, 91.7, 80.6, 79.7, 76.3, 74.6, 73.7, 73.1, 70.6, 44.0, 39.8, 34.1, 33.5, 27.1, 25.2, 19.9, 14.6, 14.2, 9.7; MS (ESI+) calculated for [C<sub>33</sub>H<sub>44</sub>O<sub>6</sub>+Na]<sup>+</sup>: 559.30, found: 559.30; [ $\alpha$ ]<sub>D</sub><sup>25</sup> = -3.1° (c = 0.003, CHCl<sub>3</sub>).

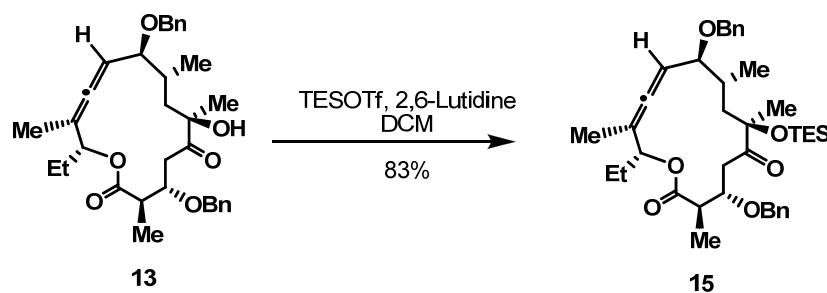

The macrolactone **13** (6.0 mg, 0.011 mmol) was dissolved in 1 mL DCM then 2,6-lutidine and TESOTf was added respectively at rt, stirred for 20 min at rt, and then quenched by addition of excess aqueous NH<sub>4</sub>Cl solution. The organic layer was diluted with 10 mL DCM, separated, and then concentrated under reduced pressure to give the crude product which was purified with FCC (3% ethyl acetate in hexane) to afford the product **15** as a colorless oil (6.0 mg, 0.0093mmol, 83% yield): IR  $\nu_{\text{max}}$ (neat)/cm<sup>-1</sup> 2957, 2934, 2875, 1726, 1455, 1370, 1167, 1072; <sup>1</sup>H NMR (500 MHz, CDCl<sub>3</sub>)  $\delta$  7.43 – 7.14 (m, 10H), 5.16 (dd, *J* = 6.2, 5.0 Hz, 1H), 5.04 – 4.90 (m, 1H), 4.60 (q, *J* = 11.0 Hz, 2H), 4.47 (d, *J* = 12.1 Hz, 1H), 4.22 (ddd, *J* = 19.7, 10.9, 5.9 Hz, 1H), 4.12 (d, *J* = 12.0 Hz, 1H), 4.05 (ddd, *J* = 8.3, 6.0, 4.3 Hz, 1H), 3.49 – 3.35 (m, 1H), 3.15 (dd, *J* = 16.9, 8.4 Hz, 1H), 2.88 – 2.82 (m, 1H), 2.82 – 2.75 (m, 1H), 1.91 (dt, *J* = 10.2, 4.7 Hz, 2H), 1.78 – 1.74 (m, 2H), 1.73

– 1.63 (m, 2H), 1.39 (s, 3H), 1.35 – 1.28 (m, 3H), 1.28 – 1.23 (m, 3H), 1.21 (d,  $J = 7.0$  Hz, 3H), 1.07 (d,  $J = 6.7$  Hz, 3H), 0.98 (dt,  $J = 6.4, 5.6$  Hz, 6H), 0.72 – 0.60 (m, 6H), 0.57 – 0.47 (m, 3H).  $^{13}\text{C}$  NMR (101 MHz,  $\text{CDCl}_3$ )  $\delta$  212.9, 204.1, 174.1, 139.2, 138.6, 128.4, 128.4, 128.3, 128.0, 127.8, 127.5, 98.9, 92.4, 83.2, 82.4, 77.4, 76.4, 72.9, 70.3, 45.3, 42.7, 41.6, 34.3, 26.9, 25.1, 18.1, 15.7, 13.1, 9.3, 7.5, 7.1; MS (ESI+) calculated for  $[\text{C}_{39}\text{H}_{56}\text{O}_6\text{Si}+\text{Na}]^+$ : 671.3, found: 671.3.  $[\alpha]_D^{25} = -33.7^\circ$  ( $c = 0.004$ ,  $\text{CHCl}_3$ )

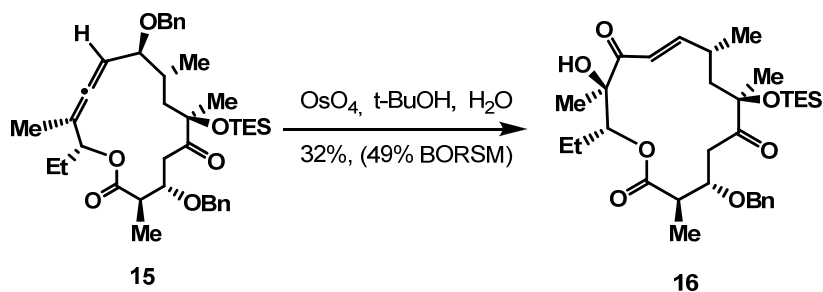

The protected ketoalcohol **15** (12.8 mg, 0.0200 mmol) was dissolved in 1 mL *t*-BuOH followed by the addition of citric acid (8.0 mg, 0.040 mmol) and the osmium tetroxide solution (0.13 mL, 4% wt. in water). The resulting dark purple solution was then stirred at rt for 3 h then the reaction was stopped by adding 10 mL saturated solution of sodium sulfite and extracted with 20 mL ethyl acetate. The organic layer was separated and then concentrated under reduced pressure to give a crude product which was purified by FCC using 10% ethyl acetate in hexane to afford product **16** as a colorless oil: (3.7 mg, 0.0064 mmol, 32% yield, 4.5 mg starting material recovered, 49% BORSM) IR  $\nu_{\text{max}}(\text{neat})/\text{cm}^{-1}$  3479, 2921, 2876, 2850, 1731, 1698, 1623, 1455, 1367;  $^1\text{H}$  NMR (600 MHz,  $\text{CDCl}_3$ )  $\delta$  7.33–7.28 (m, 5H); 6.64 (d,  $J = 15.5$  Hz, 1H), 6.60 (dd,  $J = 8.2, 15.5$  Hz, 1H), 4.89 (dd,  $J = 2.5, 11.3$  Hz, 1H), 4.56 (d,  $J = 11.6$  Hz, 1H), 4.49 (d,  $J = 11.6$  Hz, 1H), 3.68 (m, 1H), 3.60 (m, 1H), 3.42 (dd,  $J = 4.3, 18.8$  Hz, 1H), 2.58 (m, 1H), 2.44 (dd,  $J = 3.4, 18.8$  Hz, 1H), 2.29 (dd,  $J = 10.2, 14.3$  Hz, 1H), 2.02 (m, 1H), 1.78 (m, 1H), 1.45 (dd,  $J = 2.1, 14.3$  Hz, 1H), 1.31 (s, 3H), 1.23 (s, 3H), 1.21 (d,  $J = 7.0$  Hz, 3H), 1.02 (d,  $J = 6.6$  Hz, 3H), 1.01 (t,  $J = 7.9$ , 9H), 0.88 (t,  $J = 7.4$  Hz, 3H), 0.66 (m, 6H);  $^{13}\text{C}$  NMR (150 MHz,  $\text{CDCl}_3$ )  $\delta$  212.5, 202.7, 178.5, 154.9, 138.5, 128.6, 128.3, 128.0, 122.7, 84.4, 82.4, 80.8, 77.1, 73.0, 46.3, 43.0, 37.6, 33.3, 28.3, 23.6, 23.0, 22.5, 16.0, 10.9, 7.5, 7.0; MS (ESI+) calculated for  $[\text{C}_{32}\text{H}_{50}\text{O}_7\text{Si}+\text{Na}]^+$ : 597.3, found: 597.3

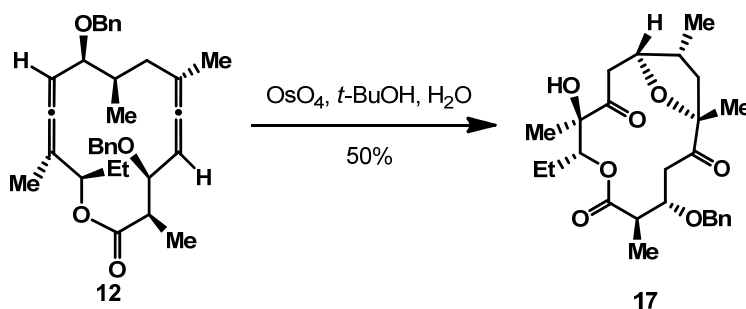

The macro lactone **12** (10 mg, 0.02 mmol) was dissolved in a 1:1 mixture solution of  $t\text{-BuOH}$  and water (1 mL), then 0.28 mL  $\text{OsO}_4$  solution (4% wt. in water) was added at rt, stirred for 4 h then quenched with 15 mL saturated sodium sulfite solution, and then extracted with diethyl ether (2 x 20 mL). The organic layers were combined, dried over  $\text{Na}_2\text{SO}_4$ , filtered, and then concentrated under reduced pressure to give a crude product, which was purified by FCC using 20% ethyl acetate and hexane to afford macro lactone **17** as a colorless oil: (4.4 mg, 0.0092 mmol, 46% yield) IR  $\nu_{\text{max}}(\text{neat})/\text{cm}^{-1}$  3477, 2971, 2934, 2878, 1735, 1711, 1455, 1382;  $^1\text{H}$  NMR (600 MHz,  $\text{CDCl}_3$ )  $\delta$  7.35 – 7.30(m, 5H), 4.89 (dd,  $J = 9.0$ , 3.4 Hz, 1H), 4.63 (m, 1H), 4.57 (d,  $J = 11.6$  Hz, 1H), 4.59 (d,  $J = 11.6$  Hz, 1H), 3.86 (m,  $J = 11.1$ , 4.7 Hz, 1H), 3.37 (dd,  $J = 14.5$ , 6.4 Hz, 1H), 3.08 (dd,  $J = 18.7$ , 10.2 Hz, 1H), 2.98 – 2.82 (m, 1H), 2.51 – 2.36 (m, 1H), 2.29 (dd,  $J = 4.7$ , 14.5 Hz, 1H), 1.97 (m, 1H), 1.89 (dd,  $J = 12.9$ , 9.1 Hz, 1H), 1.79 (dd,  $J = 12.9$ , 7.3 Hz, 1H), 1.55 (m, 1H), 1.38 (s, 3H), 1.27 (s, 3H), 1.21 (d,  $J = 7.3$  Hz, 3H), 0.93 (t,  $J = 7.5$  Hz, 3H), 0.67 (d,  $J = 7.0$  Hz, 3H);  $^{13}\text{C}$  NMR (150 MHz,  $\text{CDCl}_3$ )  $\delta$  213.3, 212.6, 173.2, 137.5, 128.8, 128.4, 128.0, 88.5, 78.9, 78.4, 77.8, 76.3, 72.0, 42.1, 40.5, 39.6, 35.4, 34.9, 25.2, 23.1, 17.0, 15.0, 14.2, 11.0; MS (ESI+) calculated for  $[\text{C}_{26}\text{H}_{36}\text{O}_7 + \text{Na}]^+$ : 483.3, found: 483.3.

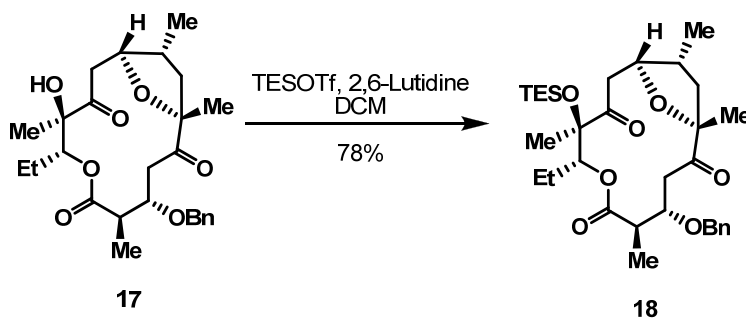

The keto-alcohol **17** (4.0 mg, 0.0082 mmol) was dissolved in 1.5 mL DCM then 2,6-lutidine (100 mg) and TESOTf (120 mg) was added respectively at rt, stirred at rt for 30 min then quenched by 10 mL saturated  $\text{NH}_4\text{Cl}$  solution. Organic layer was diluted with 10 mL DCM, separated then concentrated under reduced pressure to give the crude product, which was Further purified by FCC

using 10% ethyl acetate in hexane to afford the product **18** as a colorless oil (4.0 mg, 78% yield), which could be converted to a white crystalline by slow evaporation at rt in 1 mL 30% ethyl acetate in hexane: IR  $\nu_{\text{max}}$ (neat)/ $\text{cm}^{-1}$  3444, 2954, 2928, 2875, 1738, 1716, 1456, 1378, 1183, 1164;  $^1\text{H}$  NMR (600 MHz,  $\text{CDCl}_3$ )  $\delta$  7.33-7.30 (m, 5H), 5.2 (dd,  $J$  = 2.9, 9.5 Hz, 1H), 4.6 (d,  $J$  = 10.4 Hz, 1H), 4.48 (m, 1H), 4.44 (d,  $J$  = 10.4 Hz, 1H), 3.87 (m, 1H), 3.26 (dd,  $J$  = 9.6, 14.9 Hz, 1H), 2.92 (m, 1H), 2.78 (dd,  $J$  = 10.5, 19.0 Hz, 1H), 2.35 (dd,  $J$  = 1.5, 19.0 Hz, 1H), 2.24 (m, 1H), 2.17 (dd,  $J$  = 3.8, 14.9 Hz, 1H), 1.89 (m, 1H), 1.81 (dd,  $J$  = 11.4, 12.6 Hz, 1H), 1.73 (dd,  $J$  = 7.0, 12.6 Hz, 1H), 1.46 (m, 1H), 1.33 (s, 3H), 1.28 (s, 3H), 1.14 (d,  $J$  = 7.0 Hz, 3H), 0.91 (t,  $J$  = 7.2 Hz, 3H), 0.89 (dd,  $J$  = 7.8, 8.2 Hz, 9H), 0.68 (d,  $J$  = 6.9 Hz, 3H), 0.56-0.54 (m, 6H);  $^{13}\text{C}$  NMR (150 MHz,  $\text{CDCl}_3$ )  $\delta$  215.5, 211.4, 172.9, 137.7, 129.1, 128.5, 128.3, 88.6, 79.6 (2), 79.4, 78.1, 72.5, 41.6, 41.2, 39.8, 36.3, 35.0, 25.5, 22.7, 17.0, 14.8, 13.9, 11.1, 7.2, 6.4; MS (ESI+) calculated for  $[\text{C}_{32}\text{H}_{50}\text{O}_7\text{Si}+\text{Na}]^+$ : 597.3, found: 597.3.

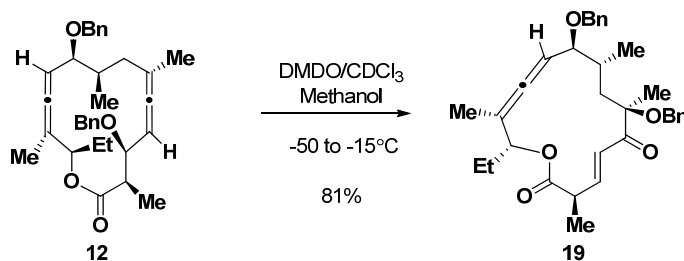

To a solution of macrocycle **12** (12 mg, 0.020 mmol) in methanol (3.0 mL) was added a solution of DMSO (0.38 mL, 0.14 mmol) dropwise at  $-50^\circ\text{C}$ . The solution was stirred under inert atmosphere and warmed to  $-15^\circ\text{C}$  over 1.5 h. The mixture was then concentrated under reduced pressure to give the crude product, which was purified by FCC using 5% ethyl acetate in hexane to afford **19** as colorless oil (10 mg, 81%). For detailed NMR analysis, see page S28. IR  $\nu_{\text{max}}$ (neat)/ $\text{cm}^{-1}$  3442, 3062, 2956, 2922, 2850, 1728, 1711, 1454, 1376, 1165, 1070;  $^1\text{H}$  NMR (600 MHz,  $\text{CDCl}_3$ )  $\delta$  7.48-7.17 (m, 10H), 7.05 (dd,  $J$  = 15.7, 1.2 Hz, 1H), 6.73 (dd,  $J$  = 15.7, 8.3 Hz, 1H), 4.71 (m, 1H), 4.62 (m, 1H), 4.57 (d,  $J$  = 11.0 Hz, 1H), 4.56 (d,  $J$  = 12.0 Hz, 1H), 4.26 (d,  $J$  = 11.5 Hz, 1H), 4.24 (d,  $J$  = 11.5 Hz, 1H), 3.30 (m, 1H), 3.24 (t,  $J$  = 9.1 Hz, 1H), 1.95 (dd,  $J$  = 14.2 Hz, 1H), 1.82 (d,  $J$  = 2.9 Hz, 3H), 1.78-1.68 (m, 2H), 1.48 (dd,  $J$  = 14.4, 6.9 Hz, 1H), 1.44 (s, 3H), 1.41 (m, 1H), 1.32 (d,  $J$  = 6.8 Hz, 3H), 1.09 (d,  $J$  = 6.6 Hz, 3H), 0.99 (t,  $J$  = 7.3 Hz, 3H);  $^{13}\text{C}$  NMR (150 MHz,  $\text{CDCl}_3$ )  $\delta$  202.6, 202.1, 171.9, 145.3, 138.6, 138.6, 128.4, 128.3, 128.2, 127.8, 127.5, 127.4, 127.2, 101.1, 93.9, 84.9, 83.0, 75.8, 69.8, 66.3, 42.3, 41.4, 33.5, 26.4, 19.9, 18.0, 17.4, 14.6, 9.7; MS (ESI+) calculated for  $[\text{C}_{33}\text{H}_{40}\text{O}_5+\text{Na}]^+$ : 539.3, found: 539.3;  $[\alpha]_{\text{D}}^{25} = 3.3^\circ$  ( $c = 0.005$ ,  $\text{CHCl}_3$ ).

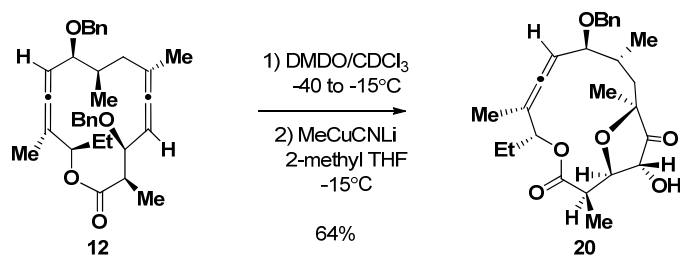

To a solution of macro lactone **12** (17.7 mg, 0.0340 mmol) in CDCl<sub>3</sub> (0.5 mL) was added a solution of DMDO (0.56 mL, 0.21 mmol) dropwise at -40 °C, warmed up to -15 °C over 30 min, then lower order methyl cyanocuprate (MeCuCNLi, 0.71 mmol) was added, prepared by addition of MeLi (0.44 mL, 0.71 mmol) to a slurry of CuCN (63 mg, 0.71 mmol) in 2-methyl THF (5.99 mL) at -78 °C and then warming to -15 °C. The mixture was warmed to -2 °C over 1.5 h, quenched with saturated aqueous solution of NH<sub>4</sub>OH and NH<sub>4</sub>Cl (1:4 ratio) and then extracted with diethyl ether. The combined organic layer was dried over anhydrous Na<sub>2</sub>SO<sub>4</sub>, filtered and then concentrated under reduced pressure to give the crude product, which was purified by FCC using 15% ethyl acetate in hexane to afford **20** (10 mg, 64% yield) as a colorless oil. For detailed NMR analysis, see page S30. IR  $\nu_{\text{max}}$  (neat)/cm<sup>-1</sup> 3434, 2968, 2925, 1959, 1764, 1725, 1452, 1370, 1155; <sup>1</sup>H NMR (600 MHz, CDCl<sub>3</sub>)  $\delta$  7.35-7.28 (m, 5H), 5.60 (dd,  $J$  = 8.1, 6.3 Hz, 1H), 5.07 (m, 2H), 4.62 (d,  $J$  = 12.1 Hz, 1H), 4.36 (d,  $J$  = 12.1 Hz, 1H), 3.90 (dd,  $J$  = 8.7, 4.4 Hz, 1H), 3.83 (dd,  $J$  = 8.1, 2.6 Hz, 1H), 3.06 (m, 1H), 1.87 (dd,  $J$  = 15.0, 5.8 Hz, 1H), 1.80 (d,  $J$  = 2.8 Hz, 3H), 1.70 (m, 2H), 1.65 (m, 2H), 1.35 (d,  $J$  = 7.4 Hz, 2H), 1.14 (s, 3H), 0.93 (t,  $J$  = 7.6 Hz, 3H), 0.88 (d,  $J$  = 7.0 Hz, 3H); <sup>13</sup>C NMR (150 MHz, CDCl<sub>3</sub>)  $\delta$  218.9, 206.6, 171.0, 138.9, 128.2, 127.7, 127.3, 99.0, 90.7, 83.4, 82.3, 79.7, 76.6, 72.5, 70.2, 42.9, 40.2, 34.0, 24.3, 22.8, 14.5, 13.8, 13.6, 10.0; MS (ESI+) calculated for [C<sub>26</sub>H<sub>34</sub>O<sub>6</sub>+Na]<sup>+</sup>: 465.2, found: 465.5;  $[\alpha]_{\text{D}}^{25}$  = 5.9° (c = 0.005, CHCl<sub>3</sub>).

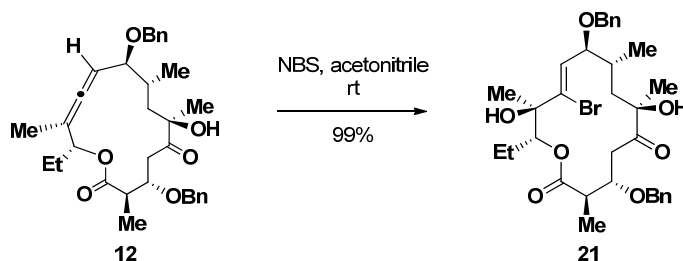

To a stirred solution of macro lactone **12** (7.8 mg, 0.015 mmol) in 1.0 mL of acetonitrile was added *N*-bromosuccinimide (34 mg, 0.19 mmol) at rt then stirred for 5 min. The reaction mixture was quenched with 1 mL of saturated aqueous solution of Na<sub>2</sub>S<sub>2</sub>O<sub>3</sub> and then extracted with diethyl ether (2 x 5 mL). The organic layer was separated and then concentrated under reduced pressure to

give the crude product which was purified by FCC using 14% ethyl acetate in hexane to afford **21** as colorless oil: (9.1 mg, 99% yield). For detailed NMR analysis, see page S32. IR  $\nu_{\text{max}}$  (neat)/ $\text{cm}^{-1}$  3442, 3062, 2956, 2922, 2850, 1728, 1711, 1454, 1376, 1165, 1070;  $^1\text{H}$  NMR (600 MHz,  $\text{CDCl}_3$ )  $\delta$  7.37-7.24 (m, 10H), 6.14 (d,  $J$  = 8.4 Hz, 1H), 4.89 (dd,  $J$  = 10.9, 2.4 Hz, 1H), 4.64 (d,  $J$  = 11.1 Hz, 1H), 4.52 (m, 2H), 4.40 (d,  $J$  = 12.3 Hz, 1H), 4.34 (m, 1H), 4.00 (dd,  $J$  = 8.3, 6.1 Hz, 1H), 3.11 (dd,  $J$  = 15.6, 6.4 Hz, 1H), 2.56 (q,  $J$  = 6.9 Hz, 1H), 2.47 (dd,  $J$  = 15.6, 5.7 Hz, 1H), 1.85 (m, 1H), 1.82 (m, 1H), 1.79 (dd,  $J$  = 14.4 Hz, 1H), 1.55 (m, 1H), 1.45 (dd,  $J$  = 14.4, 5.9 Hz, 1H), 1.44 (s, 3H), 1.23 (s, 3H), 1.20 (d,  $J$  = 6.9 Hz, 3H), 1.05 (d,  $J$  = 6.6 Hz, 3H), 0.80 (t,  $J$  = 7.4 Hz, 3H);  $^{13}\text{C}$  NMR (150 MHz,  $\text{CDCl}_3$ )  $\delta$  212.7, 174.6, 138.7, 138.4, 134.2, 131.2, 128.3(2), 128.1, 127.7(2), 127.5, 84.0, 79.4, 79.3, 77.1, 76.1, 73.3, 72.2, 44.8, 42.5, 41.3, 35.0, 26.8, 25.1, 24.4, 19.6, 12.6, 11.1; MS (ESI+) calculated for  $[\text{C}_{33}\text{H}_{43}\text{BrO}_7+\text{Na}]^+$ : 653.3, 655.3, found: 653.2, 655.2;  $[\alpha]_{\text{D}}^{25}$  = 7.6° ( $c$  = 0.005,  $\text{CHCl}_3$ ).

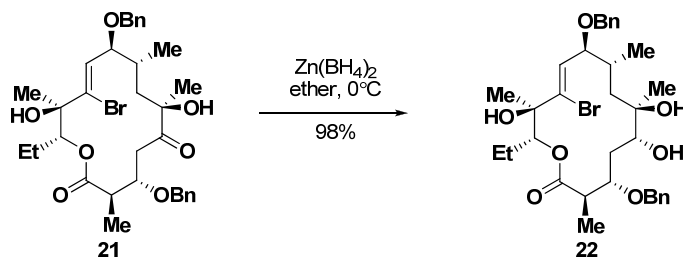

To a stirred solution of macro lactone **21** (5.0 mg, 0.0079  $\mu\text{mol}$ ) in 1.00 mL of anhydrous diethyl ether was added 0.13 M  $\text{Zn}(\text{BH}_4)_2$  solution in anhydrous diethyl ether (0.090 mL, 0.012 mmol) at 0 °C. The mixture was stirred for 30mins at 0 °C, quenched with 1 mL of saturated aqueous solution of  $\text{NH}_4\text{Cl}$ , then extracted with diethyl ether (2 x 5 mL). The organic layer was separated, dried over  $\text{Na}_2\text{SO}_4$ , filtered then concentrated under reduced pressure to give the crude product, which was purified by FCC 20% ethyl acetate in hexane to afford **22** (4.9 mg, 98% yield) as an oil. For detailed NMR analysis, see page S34. IR  $\nu_{\text{max}}$  (neat)/ $\text{cm}^{-1}$  2925, 2851, 1729, 1450, 1375, 1164, 1068;  $^1\text{H}$  NMR (600 MHz,  $\text{CDCl}_3$ )  $\delta$  7.39-7.23 (m, 10H) 6.38 (d,  $J$  = 8.6 Hz, 1H), 4.88 (dd,  $J$  = 11.0, 2.3 Hz, 1H), 4.58 (m, 2H), 4.51 (d,  $J$  = 10.7 Hz, 1H), 4.47 (d,  $J$  = 12.4 Hz, 1H), 4.36 (m, 1H), 4.11 (dd,  $J$  = 8.6, 6.6 Hz, 1H), 3.51 (dd,  $J$  = 7.0, 2.4 Hz, 1H), 2.65 (m, 1H), 2.31 (m, 1H), 1.85 (m, 2H), 1.83 (dd,  $J$  = 15.0, 3.0 Hz, 1H), 1.77 (dd,  $J$  = 15.0, 3.0 Hz, 1H), 1.61 (dd,  $J$  = 14.7, 6.1 Hz, 1H), 1.50 (s, 3H), 1.28 (s, 3H), 1.27 (d,  $J$  = 7.0 Hz, 3H), 1.17 (dd,  $J$  = 14.9, 7.0 Hz, 1H), 1.12 (d,  $J$  = 6.7 Hz, 3H), 0.89 (t,  $J$  = 7.4 Hz, 3H);  $^{13}\text{C}$  NMR (150 MHz,  $\text{CDCl}_3$ )  $\delta$  176.8, 139.0, 137.9, 133.0, 131.4, 128.3, 128.1, 128.0, 127.9, 127.6, 126.5, 84.7, 81.3, 78.2, 77.6, 75.2, 73.7, 73.1, 71.9, 44.8,

40.8, 35.9, 34.6, 27.7, 26.0, 24.7, 20.0, 12.4, 11.4; MS (ESI+) calculated for  $[\text{C}_{33}\text{H}_{45}\text{O}_7+\text{Na}]^+$ : 655.2, 657.2, found: 655.2, 657.2;  $[\alpha]_{\text{D}}^{25} = 5.8^\circ$  (c = 0.005,  $\text{CHCl}_3$ ).



Detailed  $^1\text{H}$ ,  $^{13}\text{C}$ , and selected NOE and HMBC data for 12-22

Detailed NMR analysis for compounds 12

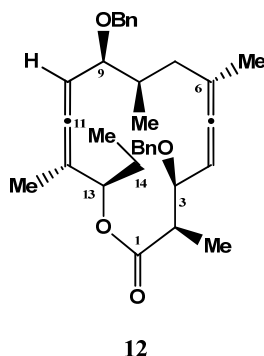

| $^1\text{H}$ NMR chemical shifts (d/ppm) and coupling constant (J/Hz)                                                                                                                                          | $^{13}\text{C}$ NMR chemical shift (d/ppm) |
|----------------------------------------------------------------------------------------------------------------------------------------------------------------------------------------------------------------|--------------------------------------------|
| 2.78 (dq, $J_{\text{H}2, \text{H}3} = 8.4\text{Hz}$ , $J_{\text{H}2, 2\text{-CH}_3} = 7.1\text{Hz}$ , H2)                                                                                                      | 173.8 ---- C1                              |
| 1.26 (d, $J_{2\text{-CH}_3, \text{H}2} = 7.1\text{Hz}$ , 2-CH <sub>3</sub> )                                                                                                                                   | 44.5 ---- C2                               |
| 3.95 (dd, $J_{\text{H}3, \text{H}2} = 8.4\text{Hz}$ , $J_{\text{H}3, \text{H}4} = 4.0\text{Hz}$ , H3)                                                                                                          | 77.2 ---- C3                               |
| 5.33 (m, $J_{\text{H}4, \text{H}3} = 4.0\text{Hz}$ , $J_{\text{H}4, 6\text{-CH}_3} = 2.9\text{Hz}$ ,<br>$J_{\text{H}4, \text{H}7\alpha} = 2.7\text{Hz}$ , $J_{\text{H}4, \text{H}7\beta} = 3.4\text{Hz}$ , H4) | 90.5 ---- C4                               |
| 1.70 (d, 6-CH <sub>3</sub> )                                                                                                                                                                                   | 201.2 ---- C5                              |
| 1.61 (m, $J_{\text{H}7\beta, \text{H}8} = 5.4\text{Hz}$ , $J_{\text{H}7\beta, \text{H}7\alpha} = 15.4\text{Hz}$ ,<br>$J_{\text{H}4, \text{H}7\beta} = 3.4\text{Hz}$ , H7 $\beta$ )                             | 102.4 ---- C6                              |
| 2.18 (m, $J_{\text{H}7\alpha, \text{H}8} = 5.7\text{Hz}$ , $J_{\text{H}7\alpha, \text{H}7\beta} = 15.4\text{Hz}$ ,<br>$J_{\text{H}4, \text{H}7\alpha} = 2.7\text{Hz}$ , H7 $\alpha$ )                          | 37.7 ---- C7                               |
| 1.96 (m, $J_{\text{H}7\alpha, \text{H}8} = 5.7\text{Hz}$ , $J_{\text{H}7\beta, \text{H}8} = 5.4\text{Hz}$ ,<br>$J_{\text{H}8, 8\text{-CH}_3} = 6.7\text{Hz}$ , $J_{\text{H}8, \text{H}9} = 7.2\text{Hz}$ , H8) | 35.9 ---- C8                               |
| 1.05 (d, $J_{8\text{-CH}_3, \text{H}8} = 6.7\text{Hz}$ , 8-CH <sub>3</sub> )                                                                                                                                   | 81.6 ---- C9                               |
| 3.74 (dd, $J_{\text{H}9, \text{H}8} = 7.2\text{Hz}$ , $J_{\text{H}9, \text{H}10} = 7.8\text{Hz}$ , H9)                                                                                                         | 91.7 ---- C10                              |
| 5.13 (m, $J_{\text{H}9, \text{H}10} = 7.8\text{Hz}$ , $J_{\text{H}10, 12\text{-CH}_3} = 2.9\text{Hz}$ ,<br>$J_{\text{H}10, \text{H}13} = 1.1\text{Hz}$ , H10)                                                  | 203.4 ---- C11                             |
| 1.71 (d, $J_{\text{H}10, 12\text{-CH}_3} = 2.9\text{Hz}$ , 12-CH <sub>3</sub> )                                                                                                                                | 99.0 ---- C12                              |
| 5.26 (dt, $J_{\text{H}10, \text{H}13} = 1.1\text{Hz}$ , $J_{\text{H}13, \text{H}14} = 6.8\text{Hz}$ , H13)                                                                                                     | 75.5 ---- C13                              |
| 1.69, 1.67 (m, 14-CH <sub>2</sub> )                                                                                                                                                                            | 24.9 ---- C14                              |
| 0.90 (t, $J_{14\text{-CH}_3, \text{H}14} = 7.5\text{Hz}$ , 14-CH <sub>3</sub> )                                                                                                                                | 15.2 ---- 2-CH <sub>3</sub>                |
| 4.64 (d, $J = 11.7\text{Hz}$ , 3-Bn-CH <sub>2</sub> a)                                                                                                                                                         | 20.2 ---- 6-CH <sub>3</sub>                |
| 4.48 (d, $J = 11.7\text{Hz}$ , 3-Bn-CH <sub>2</sub> b)                                                                                                                                                         | 17.6 ---- 8-CH <sub>3</sub>                |
| 4.54 (d, $J = 11.9\text{Hz}$ , 9-Bn-CH <sub>2</sub> a)                                                                                                                                                         | 14.0 ---- 12-CH <sub>3</sub>               |
| 4.34 (d, $J = 11.9\text{Hz}$ , 9-Bn-CH <sub>2</sub> b)                                                                                                                                                         | 9.6 ---- 14-CH <sub>3</sub>                |
| 7.22-7.35 (two phenyl)                                                                                                                                                                                         |                                            |

# HMBC

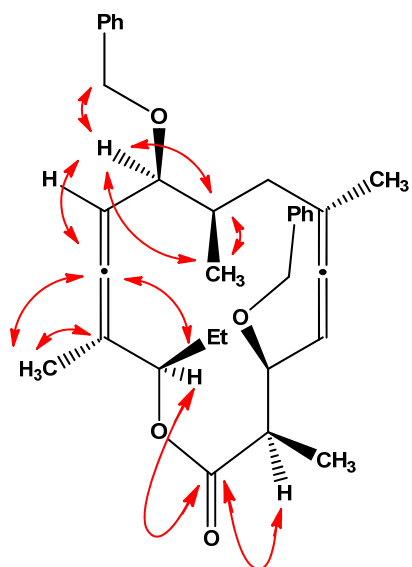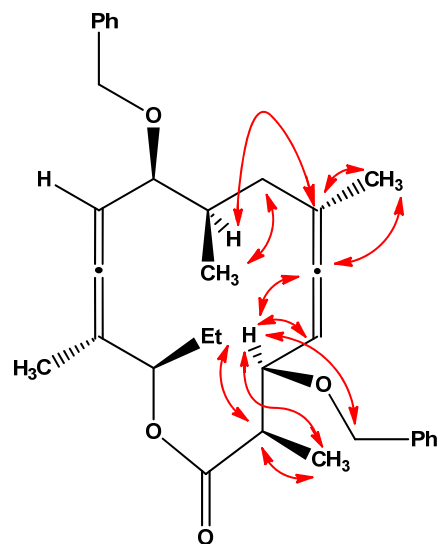

# NOESY

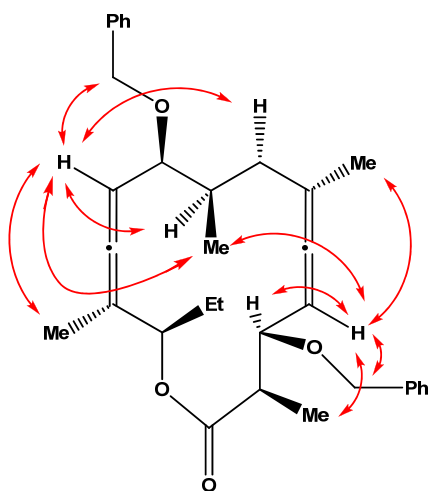

## Detailed NMR analysis for compounds 13

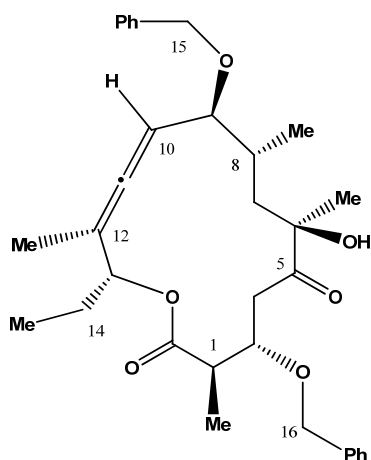

| <sup>1</sup> H NMR chemical shifts (d/ppm) and coupling constant (J/Hz)                                                               | <sup>13</sup> C NMR chemical shift (d/ppm) |
|---------------------------------------------------------------------------------------------------------------------------------------|--------------------------------------------|
| 2.58 (dq, J <sub>H2, H3</sub> = 8.7Hz, J <sub>H2, 2-CH3</sub> = 6.8Hz, H2)                                                            | 173.84 — C1                                |
| 1.30 (d, J <sub>2-CH3, H2</sub> = 6.8Hz, 2-CH <sub>3</sub> )                                                                          | 45.56 — C2                                 |
| 4.15 (m, J <sub>H3, H2</sub> = 8.7Hz, J <sub>H3, H4α</sub> = 3.8Hz, J <sub>H3, H4β</sub> = 6.9Hz, H3)                                 | 76.0 — C3                                  |
| 2.93 (dd, J <sub>H4α, H3</sub> = 3.8Hz, J <sub>H4α, H4β</sub> = 17.7, H4α)                                                            | 42.6 — C4                                  |
| 2.96 (dd, J <sub>H4β, H3</sub> = 6.9Hz, J <sub>H4α, H4β</sub> = 17.7, H4β)                                                            | 212.1 — C5                                 |
| 1.32 (s, 6-CH <sub>3</sub> )                                                                                                          | 78.9 — C6                                  |
| 1.90 (dd, J <sub>H7β, H8</sub> = 6.6Hz, J <sub>H7β, H7α</sub> = 15.1Hz, H7β)                                                          | 43.0 — C7                                  |
| 1.54 (dd, J <sub>H7α, H8</sub> = 3.2Hz, J <sub>H7α, H7β</sub> = 15.1Hz, H7α)                                                          | 34.2 — C8                                  |
| 1.69 (m, J <sub>H7α, H8</sub> = 3.2Hz, J <sub>H7β, H8</sub> = 6.6Hz, J <sub>H8, 8-CH3</sub> = 6.8Hz, J <sub>H8, H9</sub> = 6.8Hz, H8) | 82.3 — C9                                  |
| 1.05 (d, J <sub>8-CH3, H8</sub> = 6.8Hz, 8-CH <sub>3</sub> )                                                                          | 96.7 — C10                                 |
| 3.44 (dd, J <sub>H9, H8</sub> = 6.8Hz, J <sub>H9, H10</sub> = 8.1Hz, H9)                                                              | 204.0 — C11                                |
| 4.94 (m, J <sub>H9, H10</sub> = 8.1Hz, J <sub>H10, H13</sub> = 1.1Hz, J <sub>H10, 12-CH3</sub> = 2.9Hz, H10)                          | 99.8 — C12                                 |
| 1.79 (d, J <sub>H10, 12-CH3</sub> = 2.9Hz, 12-CH <sub>3</sub> )                                                                       | 76.5 — C13                                 |
| 5.15 (m, J <sub>H13, H14</sub> = 7.0 Hz, J <sub>H10, H13</sub> = 1.1Hz H13)                                                           | 25.3 — C14                                 |
| 1.69, 1.73 (m, 14-CH <sub>2</sub> )                                                                                                   | 13.7 — 2-CH <sub>3</sub>                   |
| 0.90 (t, J <sub>14-CH3, H14</sub> = 7.4Hz, 14-CH <sub>3</sub> )                                                                       | 27.4 — 6-CH <sub>3</sub>                   |
| 4.34 (d, J <sub>H15a, H15b</sub> = 12.2, H15a)                                                                                        | 18.6 — 8-CH <sub>3</sub>                   |
| 4.60 (d, J <sub>H15a, H15b</sub> = 12.2, H15b)                                                                                        | 15.5 — 12-CH <sub>3</sub>                  |
| 4.56 (d, J = 11.6Hz, H16a)                                                                                                            | 9.6 — 14-CH <sub>3</sub>                   |
| 4.74 (d, J = 11.6Hz, H16b)                                                                                                            | 73.8 — C16                                 |
| 7.26-7.38 (m, 10H, two phenyl)                                                                                                        | 70.0 — C15                                 |
|                                                                                                                                       | 138.6 — ipsoC-15                           |
|                                                                                                                                       | 128.1 — orthoC-15                          |
|                                                                                                                                       | 128.6 — metaC-15                           |
|                                                                                                                                       | 127.9 — paraC-15                           |
|                                                                                                                                       | 138.4 — ipsoC-16                           |
|                                                                                                                                       | 126.1 — orthoC-16                          |
|                                                                                                                                       | 128.5 — metaC-16                           |
|                                                                                                                                       | 127.7 — paraC-16                           |

## HMBC

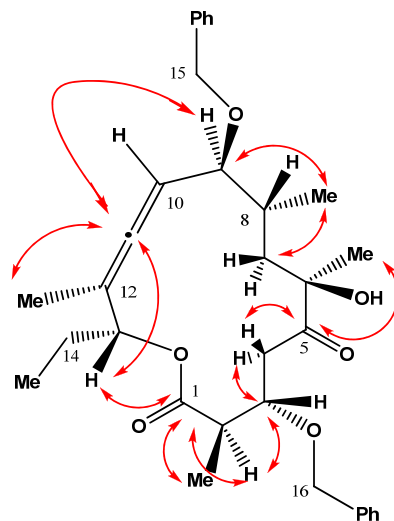

## NOESY

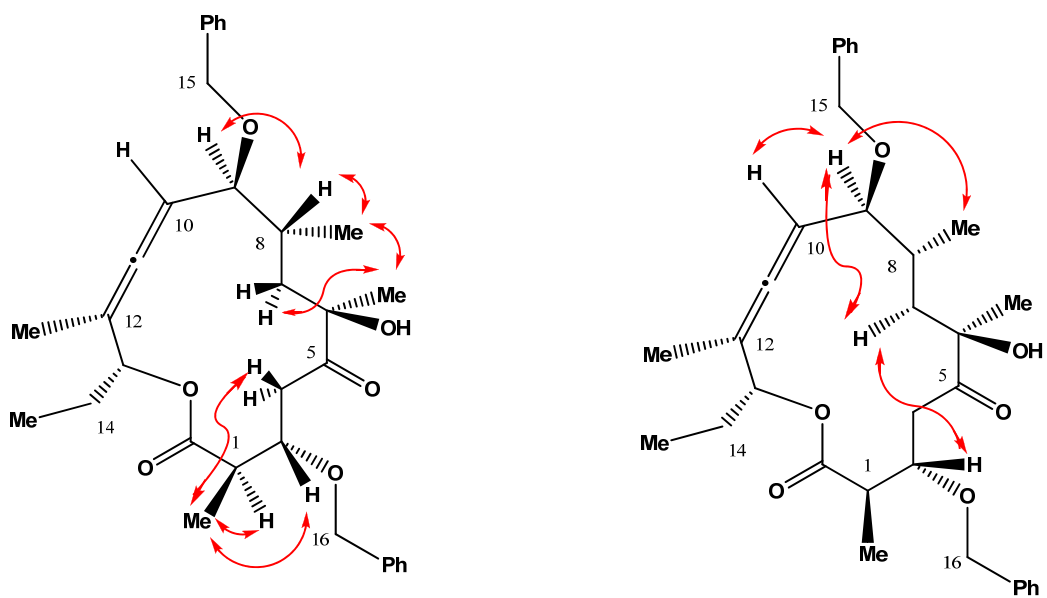

## Detailed NMR analysis for compounds 14

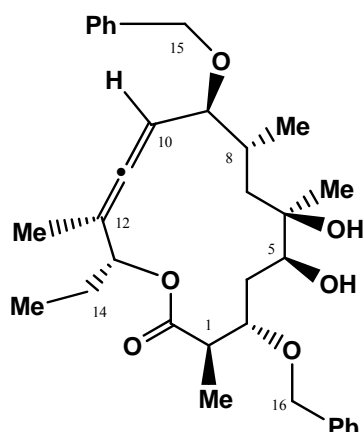

| <b><sup>1</sup>H NMR chemical shifts (d/ppm) and coupling constant (J/Hz)</b>                                                                         | <b><sup>13</sup>C NMR chemical shift (d/ppm)</b> |
|-------------------------------------------------------------------------------------------------------------------------------------------------------|--------------------------------------------------|
| 2.76 (dq, $J_{H2, H3} = 7.2\text{Hz}$ , $J_{H2, 2-CH3} = 6.9\text{Hz}$ , H2)                                                                          | 174.8 ---- C1                                    |
| 1.24 (d, $J_{2-CH3, H2} = 6.9\text{Hz}$ , 2-CH <sub>3</sub> )                                                                                         | 44.0 ---- C2                                     |
| 3.92 (m, $J_{H3, H2} = 7.2\text{Hz}$ , $J_{H3, H4\alpha} = 3.4\text{Hz}$ , $J_{H3, H4\beta} = 7.1\text{Hz}$ , H3)                                     | 79.7 ---- C3                                     |
| 1.86 (dd, $J_{H4\alpha, H3} = 3.4\text{Hz}$ , $J_{H4\alpha, H4\beta} = 15.0$ , H4 $\alpha$ )                                                          | 33.5 ---- C4                                     |
| 1.83 (dd, $J_{H4\beta, H3} = 7.1\text{Hz}$ , $J_{H4\beta, H4\alpha} = 15.0$ , H4 $\beta$ )                                                            | 74.6 ---- C5                                     |
| 3.59 (m, $J_{H4\alpha, H5} = 9.6\text{Hz}$ , $J_{H4\beta, H5} = 2.1\text{Hz}$ , $J_{H5-5-OH} = 6.21\text{Hz}$ , H5)                                   | 73.7 ---- C6                                     |
| 1.16 (s, 6-CH <sub>3</sub> )                                                                                                                          | 39.8 ---- C7                                     |
| 2.89 (s, 6-OH)                                                                                                                                        | 34.1 ---- C8                                     |
| 1.99 (dd, $J_{H7\beta, H8} = 5.3\text{Hz}$ , $J_{H7\beta, H7\alpha} = 14.8\text{Hz}$ , H7 $\beta$ )                                                   | 80.6 ---- C9                                     |
| 1.07 (dd, $J_{H7\alpha, H8} = 3.8\text{Hz}$ , $J_{H7\alpha, H7\beta} = 14.8\text{Hz}$ , H7 $\alpha$ )                                                 | 91.7 ---- C10                                    |
| 2.06 (m, $J_{H7\alpha, H8} = 3.8\text{Hz}$ , $J_{H7\beta, H8} = 5.3\text{Hz}$ ,<br>$J_{H8, 8-CH3} = 6.9\text{Hz}$ , $J_{H8, H9} = 5.5\text{Hz}$ , H8) | 204.2 ---- C11                                   |
| 1.00 (d, $J_{8-CH3, H8} = 6.9\text{Hz}$ , 8-CH <sub>3</sub> )                                                                                         | 99.5 ---- C12                                    |
| 3.69 (dd, $J_{H9, H8} = 5.5\text{Hz}$ , $J_{H9, H10} = 7.5\text{Hz}$ , H9)                                                                            | 76.3 ---- C13                                    |
| 5.21 (m, $J_{H9, H10} = 7.5\text{Hz}$ , $J_{H10, H13} = 1.2\text{Hz}$ , $J_{H10, 12-CH3} = 3.0\text{Hz}$ , H10)                                       | 25.2 ---- C14                                    |
| 1.74 (d, $J_{H10, 12-CH3} = 3.0\text{Hz}$ , 12-CH <sub>3</sub> )                                                                                      | 14.2 ---- 2-CH <sub>3</sub>                      |
| 5.38 (m, $J_{H13, H14} = 6.8\text{Hz}$ , $J_{H10, H13} = 1.2\text{Hz}$ , H13)                                                                         | 27.1 ---- 6-CH <sub>3</sub>                      |
| 1.72 (m, 14-CH <sub>2</sub> )                                                                                                                         | 19.9 ---- 8-CH <sub>3</sub>                      |
| 0.91 (t, $J_{14-CH3, H14} = 7.3\text{Hz}$ , 14-CH <sub>3</sub> )                                                                                      | 14.6 ---- 12-CH <sub>3</sub>                     |
| 4.59 (d, $J_{H15a, H15b} = 11.1$ , H15a)                                                                                                              | 9.7 ---- 14-CH <sub>3</sub>                      |
| 4.60 (d, $J_{H15a, H15b} = 11.1$ , H15b)                                                                                                              | 73.1 ---- C16                                    |
| 4.42 (d, $J = 12.3\text{Hz}$ , H16a)                                                                                                                  | 70.6 ---- C15                                    |
| 4.74 (d, $J = 12.3\text{Hz}$ , H16b)                                                                                                                  |                                                  |
| 7.27-7.37 (m, 10H, two phenyl)                                                                                                                        |                                                  |

# HMBC

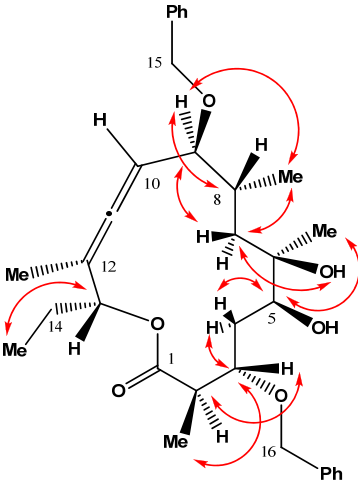

## NOESY

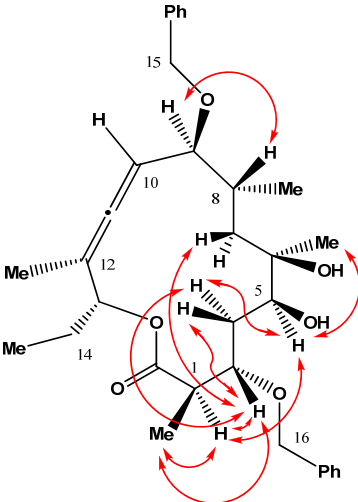

# Detailed NMR analysis for compounds 16

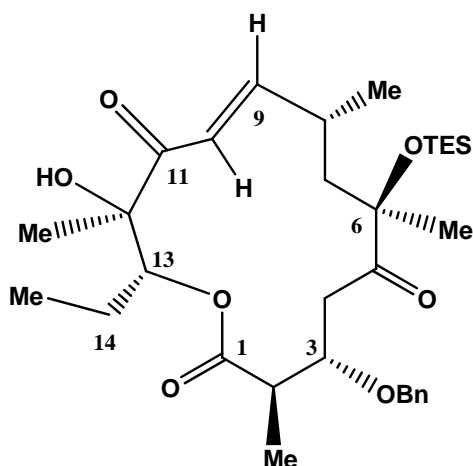

| <b><sup>1</sup>H NMR chemical shifts (d/ppm) and coupling constant (J/Hz)</b>                                                 | <b><sup>13</sup>C NMR chemical shift (d/ppm)</b> |
|-------------------------------------------------------------------------------------------------------------------------------|--------------------------------------------------|
| 3.60 (dq, $J_{H_2, H_3} = 9.7\text{Hz}$ , $J_{H_2, 2-CH_3} = 7.0\text{Hz}$ , H2)                                              | 178.5 ---- C1                                    |
| 1.21 (d, $J_{2-CH_3, H_2} = 7.0\text{Hz}$ , 2-CH <sub>3</sub> )                                                               | 43.0 ---- C2                                     |
| 3.68 (ddd, $J_{H_3, H_2} = 9.7\text{Hz}$ , $J_{H_3, H_{4\alpha}} = 3.4\text{Hz}$ , $J_{H_3, H_{4\beta}} = 4.3\text{Hz}$ , H3) | 77.1 ---- C3                                     |
| 2.44 (dd, $J_{H_{4\alpha}, H_3} = 3.4\text{Hz}$ , $J_{H_{4\alpha}, H_{4\beta}} = 18.8$ , H <sub>4</sub> $\alpha$ )            | 37.6 ---- C4                                     |
| 3.42 (dd, $J_{H_{4\beta}, H_3} = 4.3\text{Hz}$ , $J_{H_{4\beta}, H_{4\alpha}} = 18.8$ , H <sub>4</sub> $\beta$ )              | 212.5 ---- C5                                    |
| 1.23 (s, 6-CH <sub>3</sub> )                                                                                                  | 82.4 ---- C6                                     |
| 2.29 (dd, $J_{H_{7\beta}, H_8} = 10.2\text{Hz}$ , $J_{H_{7\beta}, H_{7\alpha}} = 14.3\text{Hz}$ , H <sub>7</sub> $\beta$ )    | 46.3 ---- C7                                     |
| 1.45 (dd, $J_{H_{7\alpha}, H_8} = 2.1\text{Hz}$ , $J_{H_{7\alpha}, H_{7\beta}} = 14.3\text{Hz}$ , H <sub>7</sub> $\alpha$ )   | 33.3 ---- C8                                     |
| 2.58 (m, $J_{H_8, 8-CH_3} = 6.6\text{Hz}$ , $J_{H_8, H_9} = 8.2\text{Hz}$ , H8)                                               | 154.9 ---- C9                                    |
| 1.02 (d, $J_{8-CH_3, H_8} = 6.6\text{Hz}$ , 8-CH <sub>3</sub> )                                                               | 122.7 ---- C10                                   |
| 6.60 (dd, $J_{H_9, H_8} = 8.2\text{Hz}$ , $J_{H_9, H_{10}} = 15.5\text{ Hz}$ , H9)                                            | 202.7 ---- C11                                   |
| 6.64 (d, $J_{H_9, H_{10}} = 15.5\text{Hz}$ , H10)                                                                             | 80.8 ---- C12                                    |
| 1.31 (s, 12-CH <sub>3</sub> )                                                                                                 | 84.4 ---- C13                                    |
| 4.89 (dd, $J_{H_{13}, H_{14}} = 2.5, 11.3\text{Hz}$ , H13)                                                                    | 23.6 ---- C14                                    |
| 1.78, 2.02 (m, 14-CH <sub>2</sub> )                                                                                           | 16.0 ---- 2-CH <sub>3</sub>                      |
| 0.88 (t, $J_{14-CH_3, H_{14}} = 7.4\text{Hz}$ , 14-CH <sub>3</sub> )                                                          | 28.3 ---- 6-CH <sub>3</sub>                      |
| 4.49 (d, $J=11.6\text{Hz}$ , Bn-CH <sub>2</sub> a)                                                                            | 22.5 ---- 8-CH <sub>3</sub>                      |
| 4.56 (d, $J=11.6\text{Hz}$ , Bn-CH <sub>2</sub> b)                                                                            | 23.0 ---- 12-CH <sub>3</sub>                     |
| 0.66 (m, $J=7.9, 15.1$ , TES-CH <sub>2</sub> )                                                                                | 10.9 ---- 14-CH <sub>3</sub>                     |
| 1.01 (t, $J=7.9$ , TES-CH <sub>3</sub> )                                                                                      | 138.1 ---- ipsoC                                 |
|                                                                                                                               | 128.3 ---- orthoC                                |
|                                                                                                                               | 128.6 ---- metaC                                 |
|                                                                                                                               | 128.0 ---- paraC                                 |
|                                                                                                                               | 7.01 ---- TES-CH <sub>2</sub>                    |
|                                                                                                                               | 7.45 ---- TES-CH <sub>3</sub>                    |

## HMBC

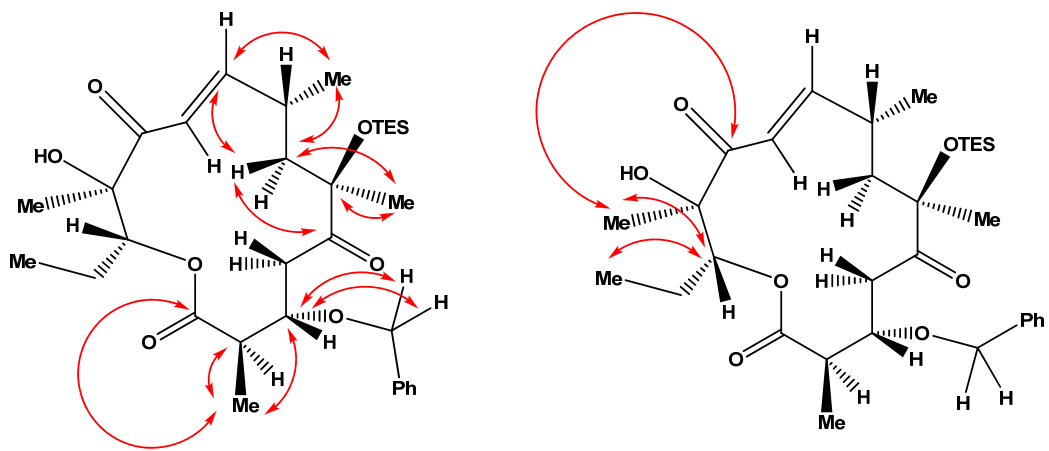

## NOESY

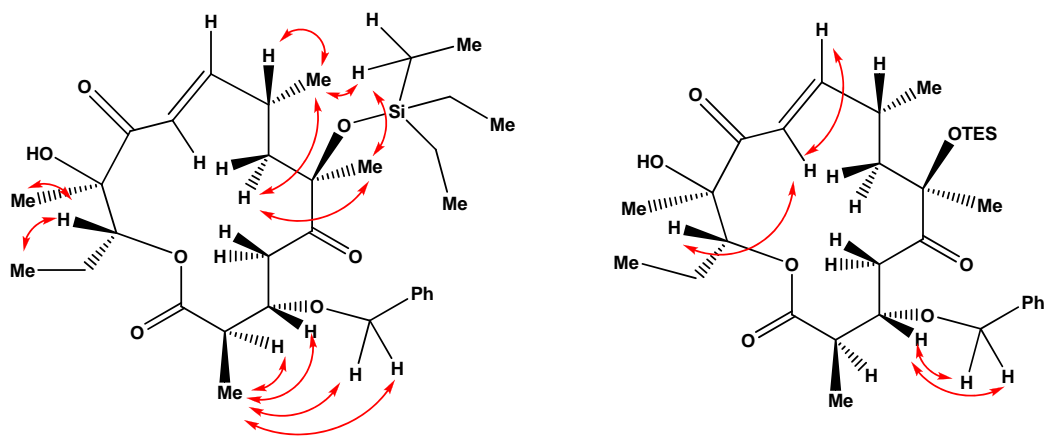



# Detailed NMR analysis for compounds 17

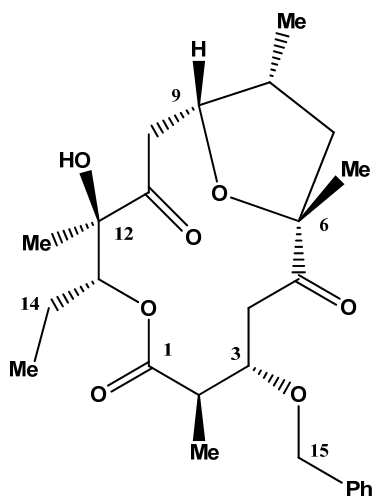

| 1H NMR chemical shifts (d/ppm) and coupling constant (J/Hz)                                                                                                       | 13C NMR chemical shift (d/ppm) |
|-------------------------------------------------------------------------------------------------------------------------------------------------------------------|--------------------------------|
| 2.89 (dq, $J_{H_2, H_3} = 11.1\text{Hz}$ , $J_{H_2, 2-CH_3} = 7.3\text{Hz}$ , H2)                                                                                 | 173.2 ---- C1                  |
| 1.21 (d, $J_{2-CH_3, H_2} = 7.3\text{Hz}$ , 2-CH <sub>3</sub> )                                                                                                   | 42.1 ---- C2                   |
| 3.86 (m, $J_{H_3, H_2} = 11.1\text{Hz}$ , $J_{H_3, H_{4\alpha}} = 4.7\text{Hz}$ , $J_{H_3, H_{4\beta}} = 6.4\text{Hz}$ , H3)                                      | 78.4 ---- C3                   |
| 2.29 (dd, $J_{H_{4\alpha}, H_3} = 4.7\text{Hz}$ , $J_{H_{4\alpha}, H_{4\beta}} = 14.5$ , H <sub>4</sub> $\alpha$ )                                                | 35.4 ---- C4                   |
| 3.37 (dd, $J_{H_{4\beta}, H_3} = 6.4\text{Hz}$ , $J_{H_{4\alpha}, H_{4\beta}} = 14.5$ , H <sub>4</sub> $\beta$ )                                                  | 212.6 ---- C5                  |
| 1.27 (s, 6-CH <sub>3</sub> )                                                                                                                                      | 88.5 ---- C6                   |
| 1.89 (dd, $J_{H_{7\beta}, H_8} = 9.1\text{Hz}$ , $J_{H_{7\beta}, H_{7\alpha}} = 12.9\text{Hz}$ , H <sub>7</sub> $\beta$ )                                         | 40.5 ---- C7                   |
| 1.79 (dd, $J_{H_{7\alpha}, H_8} = 7.3\text{Hz}$ , $J_{H_{7\alpha}, H_{7\beta}} = 12.9\text{Hz}$ , H <sub>7</sub> $\alpha$ )                                       | 34.9 ---- C8                   |
| 2.40 (m, $J_{H_{7\alpha}, H_8} = 7.3\text{Hz}$ , $J_{H_{7\beta}, H_8} = 9.1\text{Hz}$ ,<br>$J_{H_8, 8-CH_3} = 7.0\text{Hz}$ , $J_{H_8, H_9} = 6.9\text{Hz}$ , H8) | 76.3 ---- C9                   |
| 0.67 (d, $J_{8-CH_3, H_8} = 7.0\text{Hz}$ , 8-CH <sub>3</sub> )                                                                                                   | 39.6 ---- C10                  |
| 4.63 (ddd, $J_{H_9, H_8} = 6.9\text{Hz}$ , $J_{H_9, H_{10\alpha}} = 10.2\text{Hz}$ ,<br>$J_{H_9, H_{10\beta}} = 1.5\text{Hz}$ H9)                                 | 213.3 ---- C11                 |
| 3.08 (dd, $J_{H_9, H_{10\beta}} = 10.2\text{Hz}$ , $J_{H_{10\beta}, H_{10\alpha}} = 18.7\text{Hz}$ H <sub>10</sub> $\beta$ )                                      | 77.8 ---- C12                  |
| 2.29 (dd, $J_{H_9, H_{10\alpha}} = 1.5\text{Hz}$ , $J_{H_{10\alpha}, H_{10\beta}} = 18.7\text{Hz}$ H <sub>10</sub> $\alpha$ )                                     | 78.9 ---- C13                  |
| 1.38 (s, 12-CH <sub>3</sub> )                                                                                                                                     | 23.1 ---- C14                  |
| 4.89 (dd, $J_{H_{13}, H_{14}} = 3.4, 9.0\text{ Hz}$ , H13)                                                                                                        | 15.0 ---- 2-CH <sub>3</sub>    |
| 1.55, 1.97 (m, 14-CH <sub>2</sub> )                                                                                                                               | 25.2 ---- 6-CH <sub>3</sub>    |
| 0.93 (t, $J_{14-CH_3, H_{14}} = 7.5\text{Hz}$ , 14-CH <sub>3</sub> )                                                                                              | 14.2 ---- 8-CH <sub>3</sub>    |
| 4.57 (d, $J=11.6\text{Hz}$ , Bn-CH <sub>2</sub> a)                                                                                                                | 17.0 ---- 12-CH <sub>3</sub>   |
| 4.59 (d, $J=11.6\text{Hz}$ , Bn-CH <sub>2</sub> b)                                                                                                                | 11.0 ---- 14-CH <sub>3</sub>   |
| 7.35 ( $^o\text{H/Ph}$ )                                                                                                                                          | 137.5 ---- ipsoC               |
| 7.34 ( $^m\text{H/Ph}$ )                                                                                                                                          | 128.8 ---- orthoC              |
| 7.30 ( $^p\text{H/Ph}$ )                                                                                                                                          | 128.4 ---- metaC               |
|                                                                                                                                                                   | 128.0 ---- paraC               |
|                                                                                                                                                                   | 72.0 ---- 15-CH <sub>2</sub>   |

# HMBC

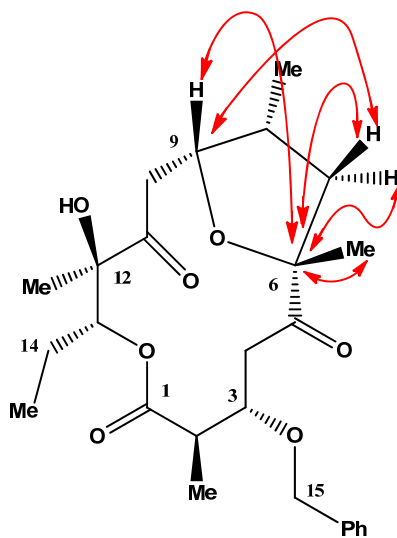

# NOESY

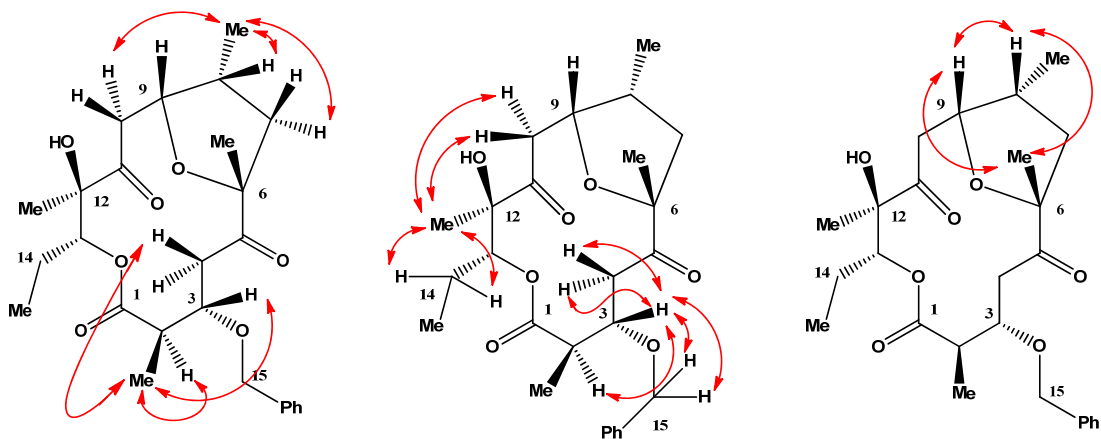

## Detailed NMR analysis for compounds 18

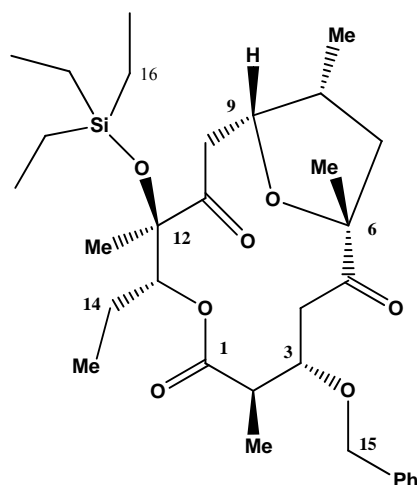

| 1H NMR chemical shifts (d/ppm) and coupling constant (J/Hz)                                                                                            | 13C NMR chemical shift (d/ppm) |
|--------------------------------------------------------------------------------------------------------------------------------------------------------|--------------------------------|
| 2.92 (dq, $J_{H2, H3} = 5.0\text{Hz}$ , $J_{H2, 2-CH3} = 7.0\text{Hz}$ , H2)                                                                           | 172.9 ----- C1                 |
| 1.14 (d, $J_{2-CH3, H2} = 7.0\text{Hz}$ , 2-CH <sub>3</sub> )                                                                                          | 41.6 ----- C2                  |
| 3.87 (m, $J_{H3, H2} = 5.0\text{Hz}$ , $J_{H3, H4\alpha} = 3.8\text{Hz}$ , $J_{H3, H4\beta} = 9.6\text{Hz}$ , H3)                                      | 79.6 ----- C3                  |
| 2.17 (dd, $J_{H4\alpha, H3} = 3.8\text{Hz}$ , $J_{H4\alpha, H4\beta} = 14.9$ , H4 $\alpha$ )                                                           | 36.3 ----- C4                  |
| 3.26 (dd, $J_{H4\beta, H3} = 9.6\text{Hz}$ , $J_{H4\alpha, H4\beta} = 14.9$ , H4 $\beta$ )                                                             | 215.5 ----- C5                 |
| 1.28 (s, 6-CH <sub>3</sub> )                                                                                                                           | 88.6 ----- C6                  |
| 1.73 (dd, $J_{H7\beta, H8} = 7.0\text{Hz}$ , $J_{H7\beta, H7\alpha} = 12.6\text{Hz}$ , H7 $\beta$ )                                                    | 41.2 ----- C7                  |
| 1.81 (dd, $J_{H7\alpha, H8} = 11.4\text{Hz}$ , $J_{H7\alpha, H7\beta} = 12.6\text{Hz}$ , H7 $\alpha$ )                                                 | 35.0 ----- C8                  |
| 2.24 (m, $J_{H7\alpha, H8} = 11.4\text{Hz}$ , $J_{H7\beta, H8} = 7.0\text{Hz}$ ,<br>$J_{H8, 8-CH3} = 6.9\text{Hz}$ , $J_{H8, H9} = 7.4\text{Hz}$ , H8) | 78.1 ----- C9                  |
| 0.68 (d, $J_{8-CH3, H8} = 6.9\text{Hz}$ , 8-CH <sub>3</sub> )                                                                                          | 39.8 ----- C10                 |
| 4.48 (ddd, $J_{H9, H8} = 7.4\text{Hz}$ , $J_{H9, H10\alpha} = 1.5\text{Hz}$ ,<br>$J_{H9, H10\beta} = 10.5\text{Hz}$ H9)                                | 211.4 ----- C11                |
| 2.78 (dd, $J_{H9, H10\beta} = 10.5\text{Hz}$ , $J_{10\beta, H10\alpha} = 19.0\text{Hz}$ H10 $\beta$ )                                                  | 79.4 ----- C12                 |
| 2.35 (dd, $J_{H9, H10\alpha} = 1.5\text{Hz}$ , $J_{10\alpha, H10\beta} = 19.0\text{Hz}$ H10 $\alpha$ )                                                 | 79.6 ----- C13                 |
| 1.33 (s, 12-CH <sub>3</sub> )                                                                                                                          | 22.7 ----- C14                 |
| 5.20 (dd, $J_{H13, H14} = 2.9, 9.5\text{ Hz}$ , H13)                                                                                                   | 14.8 ----- 2-CH <sub>3</sub>   |
| 1.46, 1.89 (m, 14-CH <sub>2</sub> )                                                                                                                    | 25.5 ----- 6-CH <sub>3</sub>   |
| 0.91 (t, $J_{14-CH3, H14} = 7.2, 7.6\text{Hz}$ , 14-CH <sub>3</sub> )                                                                                  | 13.9 ----- 8-CH <sub>3</sub>   |
| 4.44 (d, $J=10.4\text{Hz}$ , Bn-CH <sub>2</sub> a)                                                                                                     | 17.0 ----- 12-CH <sub>3</sub>  |
| 4.60 (d, $J=10.4\text{Hz}$ , Bn-CH <sub>2</sub> b)                                                                                                     | 11.1 ----- 14-CH <sub>3</sub>  |
| 0.54, 0.56(m, H16)                                                                                                                                     | 137.7 ----- ipsoC              |
| 0.89 (dd, $J= 8.2, 7.8\text{Hz}$ , 16-CH <sub>3</sub> )                                                                                                | 129.1 ----- orthoC             |
| 7.33 ( $^o\text{H/Ph}$ )                                                                                                                               | 128.5 ----- metaC              |
| 7.33 ( $^m\text{H/Ph}$ )                                                                                                                               | 128.3 ----- paraC              |
| 7.30 ( $^p\text{H/Ph}$ )                                                                                                                               | 72.5 ----- 15-CH <sub>2</sub>  |
|                                                                                                                                                        | 6.4 ----- C16                  |
|                                                                                                                                                        | 7.2 ----- 16-CH <sub>3</sub>   |

## HMBC

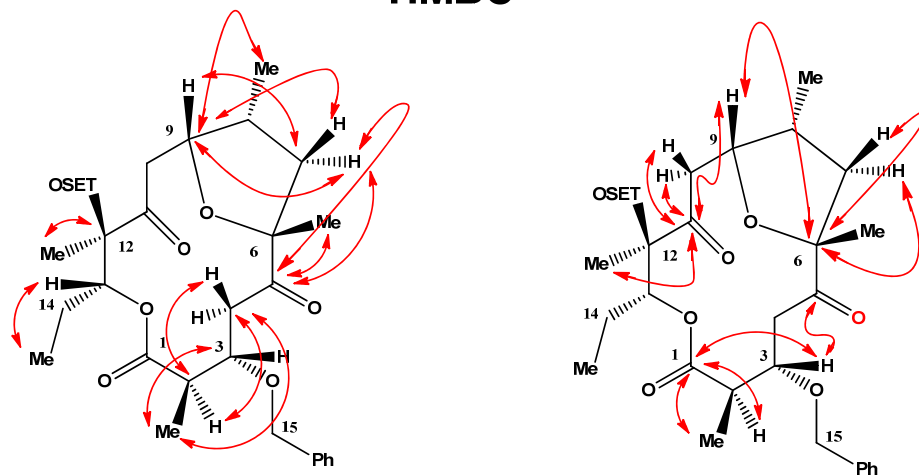

## NOESY

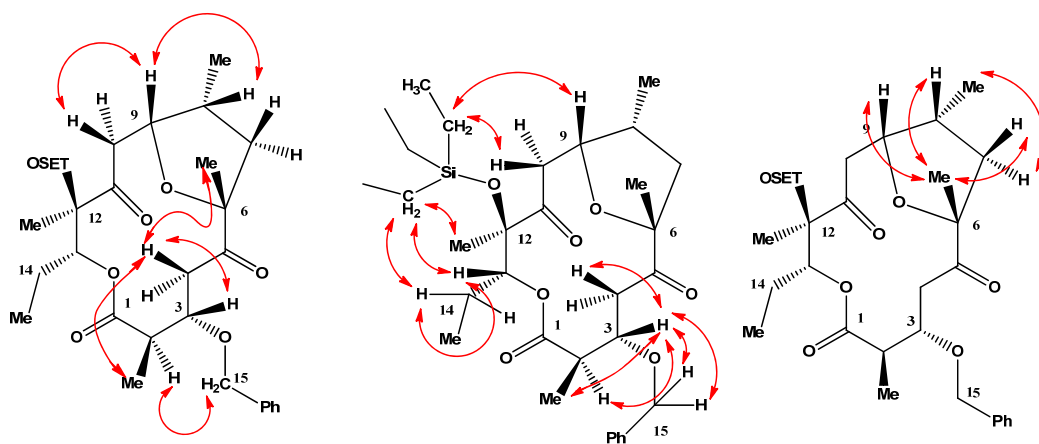

# Detailed NMR analysis for compound 19.

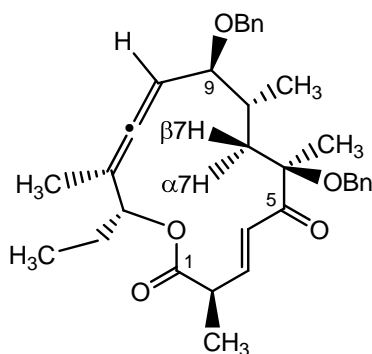

| 1H NMR chemical shifts (d/ppm) & coupling constant (J/Hz)                                                         | 13C NMR chemical shift (d/ppm) |
|-------------------------------------------------------------------------------------------------------------------|--------------------------------|
| 3.30 (ddd, $J_{H_2, H_3} = 8.2\text{Hz}$ , $J_{H_2, 2-CH_3} = 6.8\text{Hz}$ , $J_{H_2, H_4} = 1.1\text{Hz}$ , H2) | 171.9 ---- C1                  |
| 1.32 (d, $J_{2-CH_3, H_2} = 6.8\text{Hz}$ , 2-CH <sub>3</sub> )                                                   | 42.3 ---- C2                   |
| 6.73 (dd, $J_{H_3, H_4} = 15.7\text{Hz}$ , $J_{H_3, H_2} = 8.3\text{Hz}$ , H3)                                    | 145.3 ---- C3                  |
| 7.05 (dd, $J_{H_4, H_3} = 15.7\text{Hz}$ , $J_{H_4, H_2} = 1.2\text{Hz}$ , H4)                                    | 127.8 ---- C4                  |
| 1.44 (s, 6-CH <sub>3</sub> )                                                                                      | 202.1 ---- C5                  |
| 4.26 (d, $J_{AB} = 11.5\text{Hz}$ , 6-OCH <sub>2</sub> )                                                          | 84.9 ---- C6                   |
| 4.56 (d, $J_{AB} = 12.0\text{Hz}$ , 6-OCH <sub>2</sub> )                                                          | 41.4 ---- C7                   |
| 1.95 (dd, $J_{H7\alpha, H7\beta} = 14.2\text{Hz}$ , H7 $\beta$ )                                                  | 33.5 ---- C8                   |
| 1.48 (dd, $J_{H7\beta, H_8} = 6.85\text{ Hz}$ , $J_{H7\beta, H7\alpha} = 14.4\text{Hz}$ , H7 $\alpha$ )           | 83.0 ---- C9                   |
| 1.41 (m, H8)                                                                                                      | 93.9 ---- C10                  |
| 1.09 (d, $J_{8-CH_3, H_8} = 6.6\text{Hz}$ , 8-CH <sub>3</sub> )                                                   | 202.6 ---- C11                 |
| 3.24 (t, $J_{H9, H_8} = 9.1\text{Hz}$ , H9)                                                                       | 101.1 ---- C12                 |
| 4.24 (d, $J_{AB} = 11.5\text{Hz}$ , 9-OCH <sub>2</sub> )                                                          | 75.8 ---- C13                  |
| 4.57 (d, $J_{AB} = 11.0\text{Hz}$ , 9-OCH <sub>2</sub> )                                                          | 26.4 ---- C14                  |
| 4.62 (dq, $J = 9.31\text{Hz}$ , H10)                                                                              | 14.6 ---- 2-CH <sub>3</sub>    |
| 1.82 (d, $J_{12-CH_3, H_{10}} = 2.9\text{Hz}$ , 12-CH <sub>3</sub> )                                              | 17.4 ---- 6-CH <sub>3</sub>    |
| 4.71 (ddd, $J_{H_{13}, 14-CH_2} = 6.6\text{Hz}$ , $J_{H_{13}, H_{10}} = 1.6\text{Hz}$ , H13)                      | 19.9 ---- 8-CH <sub>3</sub>    |
| 1.68 - 1.78 (m, 14-CH <sub>2</sub> )                                                                              | 18.0 ---- 12-CH <sub>3</sub>   |
| 0.99 (t, $J_{14-CH_3, 13-CH_2} = 7.3\text{Hz}$ , 14-CH <sub>3</sub> )                                             | 9.7 ---- 14-CH <sub>3</sub>    |
| 7.48 - 7.17 (m, 8H, Ph)                                                                                           | 66.3 ---- 6-OCH <sub>3</sub>   |
|                                                                                                                   | 69.8 ---- 9-OCH <sub>3</sub>   |

## HMBC

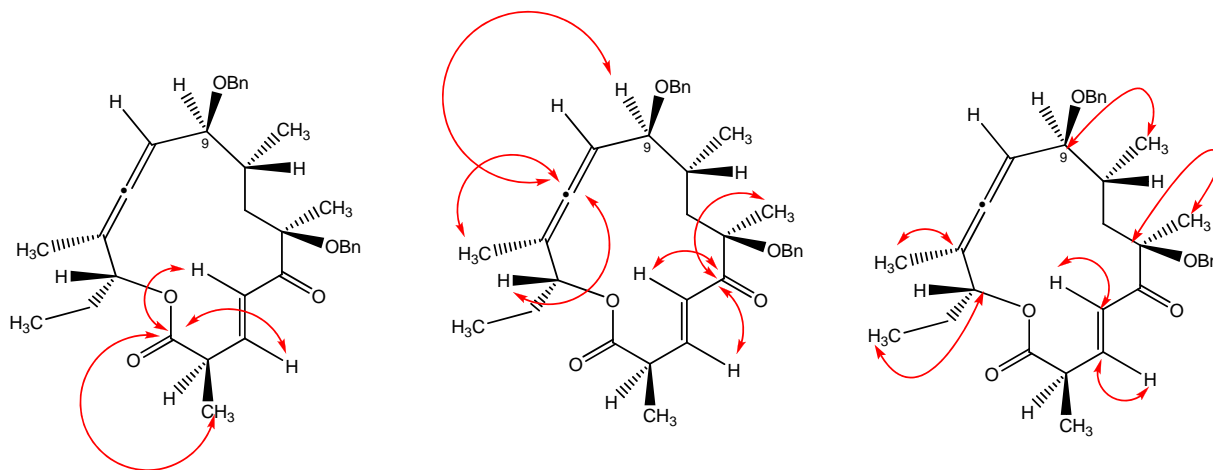

## NOESY

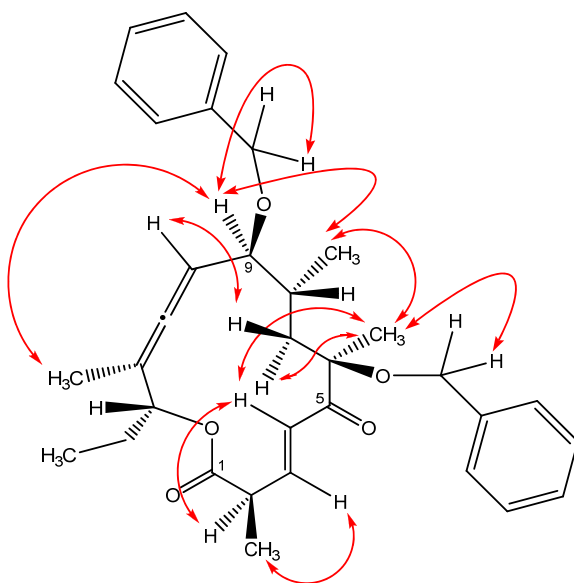

## Detailed NMR analysis for compound 20

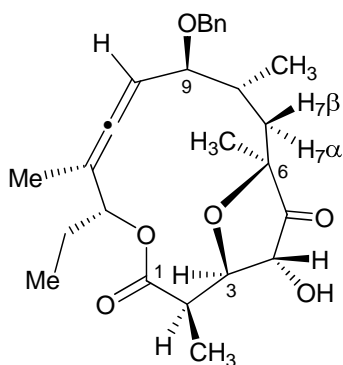

| 1H NMR chemical shifts (d/ppm) & coupling constant (J/Hz)                                                                      | 13C NMR chemical shift (d/ppm) |
|--------------------------------------------------------------------------------------------------------------------------------|--------------------------------|
| <b>3.06</b> dq, $J_{H2, H3} = 4.4\text{Hz}$ , $J_{H2, 2-CH3} = 7.4\text{Hz}$ , <b>H2</b> )                                     | 171.0 ---- C1                  |
| <b>1.35</b> (d, $J_{2-CH3, H2} = 7.4\text{Hz}$ , <b>2-CH<sub>3</sub></b> )                                                     | 40.2 ---- C2                   |
| <b>3.90</b> (dd, $J_{H3, H2} = 4.4\text{Hz}$ , $J_{H3, H4} = 8.7\text{Hz}$ , <b>H3</b> )                                       | 79.7 ---- C3                   |
| <b>5.07</b> (d, $J_{H4, H3} = 8.7\text{Hz}$ , <b>H4</b> )                                                                      | 72.5 ---- C4                   |
| <b>1.14</b> (s, <b>6-CH<sub>3</sub></b> )                                                                                      | 218.9 ---- C5                  |
| <b>1.65</b> (dd, $J_{H7\beta, H8} = 3.9\text{ Hz}$ , $J_{H7\beta, H7\alpha} = 15.0\text{Hz}$ , <b>H7<math>\beta</math></b> )   | 83.4 ---- C6                   |
| <b>1.87</b> (dd, $J_{H7\alpha, H8} = 5.8\text{ Hz}$ , $J_{H7\alpha, H7\beta} = 15.0\text{Hz}$ , <b>H7<math>\alpha</math></b> ) | 42.9 ---- C7                   |
| <b>1.70</b> (m, <b>H8</b> )                                                                                                    | 34.0 ---- C8                   |
| <b>0.88</b> (d, $J_{8-CH3, H8} = 7.0\text{Hz}$ , <b>8-CH<sub>3</sub></b> )                                                     | 82.3 ---- C9                   |
| <b>3.83</b> (dd, $J_{H9, H8} = 2.6\text{Hz}$ , $J_{H9, H10} = 8.1\text{Hz}$ , <b>H9</b> )                                      | 90.7 ---- C10                  |
| <b>4.62, 4.36</b> (d, $J_{AB} = 12.1\text{Hz}$ , <b>9-OCH<sub>2</sub></b> )                                                    | 206.6 ---- C11                 |
| <b>5.07</b> (qd, <b>H10</b> )                                                                                                  | 99.0 ---- C12                  |
| <b>1.80</b> (d, <b>12-CH<sub>3</sub></b> )                                                                                     | 76.6 ---- C13                  |
| <b>5.60</b> (dd, $J_{H13, H14} = 6.3, 8.1\text{Hz}$ , <b>H13</b> )                                                             | 24.3 ---- C14                  |
| <b>1.65, 1.70</b> (m, <b>14-CH<sub>2</sub></b> )                                                                               | 13.8 ---- 2-CH <sub>3</sub>    |
| <b>0.93</b> (t, $J_{14-CH3, H14} = 7.6\text{Hz}$ , <b>14-CH<sub>3</sub></b> )                                                  | 22.8 ---- 6-CH <sub>3</sub>    |
|                                                                                                                                | 14.5 ---- 8-CH <sub>3</sub>    |
|                                                                                                                                | 13.6 ---- 12-CH <sub>3</sub>   |
|                                                                                                                                | 10.0 ---- 14-CH <sub>3</sub>   |
|                                                                                                                                | 70.2 ---- 9-OCH <sub>3</sub>   |

## HMBC

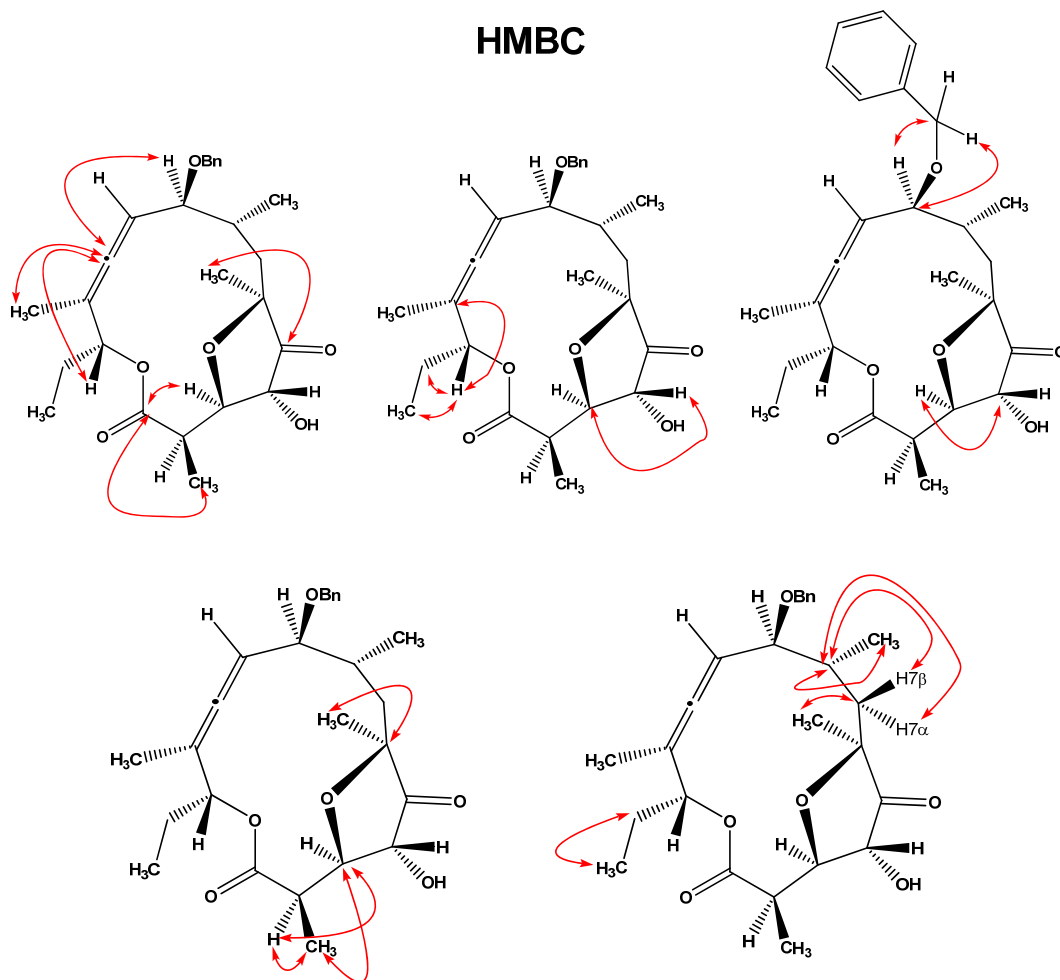

## NOESY

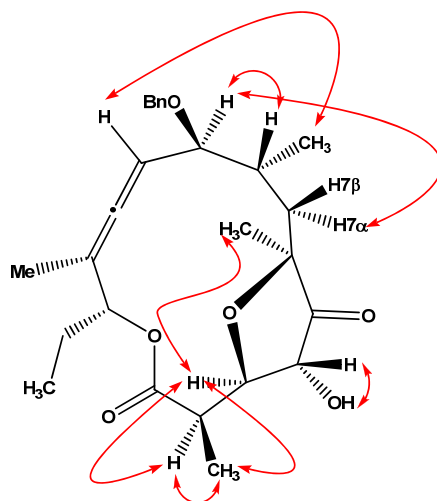



The chemical structure of compound 10 is a complex polycyclic molecule. It features a central ring system with several substituents and stereocenters. Key features include:
 

- A bromine atom (Br) at the top position, labeled with  $\beta 7H$  and  $\alpha 7H$ .
- Two benzyloxy groups (OBn) at the top and bottom positions.
- Two methyl groups (Me) at the top and bottom positions, labeled with  $\beta 4H$  and  $\alpha 4H$ .
- Two hydroxyl groups (OH) on the left and right sides.
- Two carbonyl groups (C=O) on the left and right sides.
- Two ethyl groups (Et) on the left and right sides.
- Various other stereocenters and functional groups are indicated by wedges and dashes.

S33

## HMBC

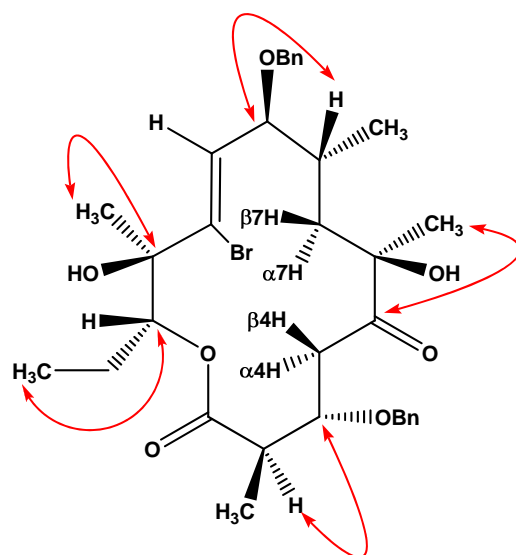

## NOESY

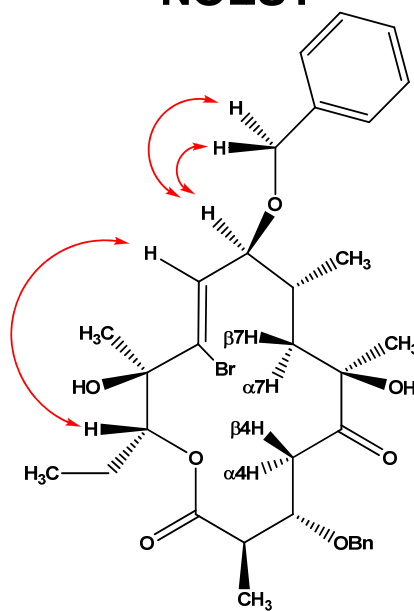

## Detailed NMR analysis for compound 22

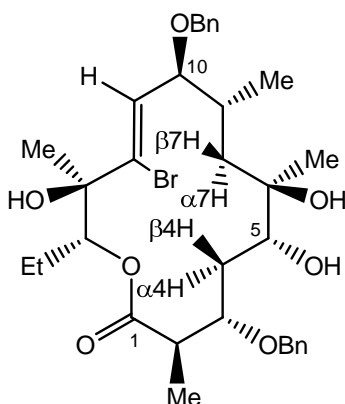

| 1H NMR chemical shifts (d/ppm) & coupling constant (J/Hz)                                                           | 13C NMR chemical shift (d/ppm)                              |
|---------------------------------------------------------------------------------------------------------------------|-------------------------------------------------------------|
| 2.65 (qd, $J_{H2, 2-CH3} = 6.9\text{Hz}$ , $J_{H2, H3} = 13.4\text{Hz}$ , H2)                                       | 176.8 ---- C1                                               |
| 1.27 (d, $J_{2-CH3, H2} = 7.0\text{Hz}$ , 2-CH <sub>3</sub> )                                                       | 44.8 ---- C2                                                |
| 4.36 (ddd, $J_{H3, H2} = 8.6\text{Hz}$ , $J_{H3, H4\alpha} = 6.2\text{Hz}$ , $J_{H3, H4\beta} = 2.9\text{Hz}$ , H3) | 78.2 ---- C3                                                |
| 4.58, 4.51 (d, $J_{AB} = 10.7\text{Hz}$ , C3-OCH <sub>2</sub> )                                                     | 35.9 ---- C4                                                |
| 1.83 (dd, $J_{H4\alpha, H4\beta} = 15.0\text{Hz}$ , $J_{H4\alpha, H3} = 8.5\text{ Hz}$ , H4 $\alpha$ )              | 75.2 ---- C5                                                |
| 1.77 (dd, $J_{H4\beta, H4\alpha} = 15.0\text{Hz}$ , $J_{H4\beta, H3} = 3.0\text{ Hz}$ , H4 $\beta$ )                | 73.7 ---- C6                                                |
| 3.51 (dd, $J_{H5, H4\alpha} = 2.4\text{ Hz}$ , $J_{H5, H4\beta} = 7.0\text{ Hz}$ , H5)                              | 40.8 ---- C7                                                |
| 1.28 (s, 6-CH <sub>3</sub> )                                                                                        | 34.6 ---- C8                                                |
| 1.61 (dd, $J_{H7\beta, H8} = 6.1\text{ Hz}$ , $J_{H7\beta, H7\alpha} = 14.7\text{Hz}$ , H7 $\beta$ )                | 84.7 ---- C9                                                |
| 1.17 (dd, $J_{H7\alpha, H8} = 7.0\text{ Hz}$ , $J_{H7\alpha, H7\beta} = 14.9\text{Hz}$ , H7 $\alpha$ )              | 131.4 ---- C10                                              |
| 2.31 (dt, $J_{H8, 8-CH3} = 6.4\text{Hz}$ , H8)                                                                      | 133.0 ---- C11                                              |
| 1.12 (d, $J_{8-CH3, H8} = 6.7\text{Hz}$ , 8-CH <sub>3</sub> )                                                       | 77.6 ---- C12                                               |
| 4.11 (dd, $J_{H9, H10} = 8.6\text{Hz}$ , $J_{H9, H8} = 6.6\text{Hz}$ , H9)                                          | 81.3 ---- C13                                               |
| 4.58, 4.47 (d, $J_{AB} = 12.4\text{Hz}$ , 9-OCH <sub>2</sub> )                                                      | 24.7 ---- C14                                               |
| 6.38 (d, $J_{H10, H9} = 8.6\text{Hz}$ , H10)                                                                        | 12.4 ---- 2-CH <sub>3</sub>                                 |
| 1.50 (s, 12-CH <sub>3</sub> )                                                                                       | 27.7 ---- 6-CH <sub>3</sub>                                 |
| 4.88 (dd, $J_{H13, H14} = 2.3, 11.0\text{Hz}$ , H13)                                                                | 20.0 ---- 8-CH <sub>3</sub>                                 |
| 1.73-1.85 (m, 14-CH <sub>2</sub> )                                                                                  | 26.0 ---- 12-CH <sub>3</sub>                                |
| 0.89 (t, $J_{14-CH3, H14} = 7.4\text{Hz}$ , 14-CH <sub>3</sub> )                                                    | 11.4 ---- 14-CH <sub>3</sub>                                |
|                                                                                                                     | 73.1 ---- 6-OCH <sub>3</sub>                                |
|                                                                                                                     | 71.9 ---- 9-OCH <sub>3</sub>                                |
|                                                                                                                     | 137.9, 139.0 ---- ipsoC (C <sub>3</sub> , C <sub>9</sub> )  |
|                                                                                                                     | 128.1, 128.0 ---- orthoC (C <sub>3</sub> , C <sub>9</sub> ) |
|                                                                                                                     | 126.5, 128.3 ---- metaC (C <sub>3</sub> , C <sub>9</sub> )  |
|                                                                                                                     | 127.9, 127.6 ---- paraC (C <sub>3</sub> , C <sub>9</sub> )  |

## HMBC

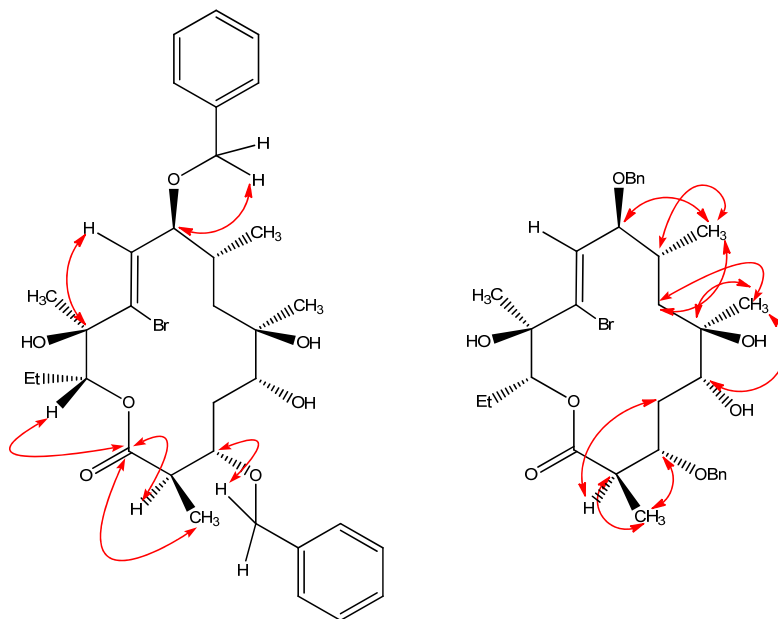

## NOESY

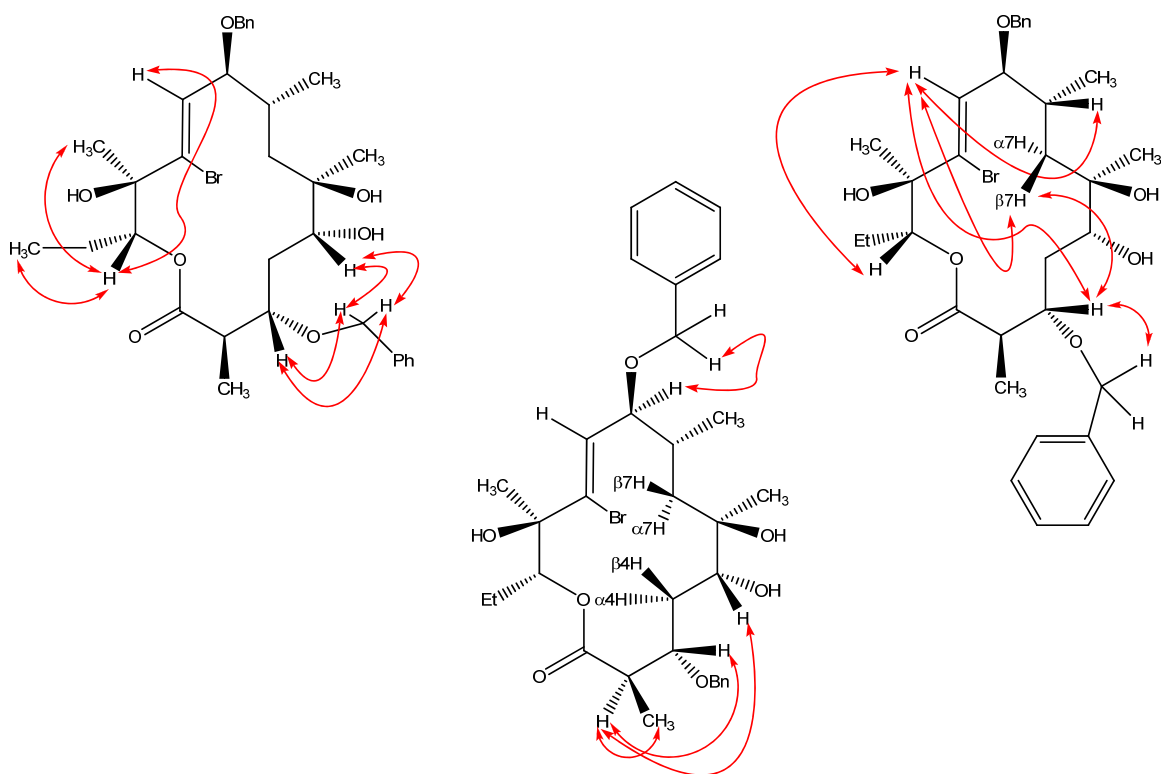

<sup>1</sup>H NMR (500MHz, CDCl<sub>3</sub>)

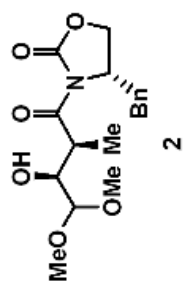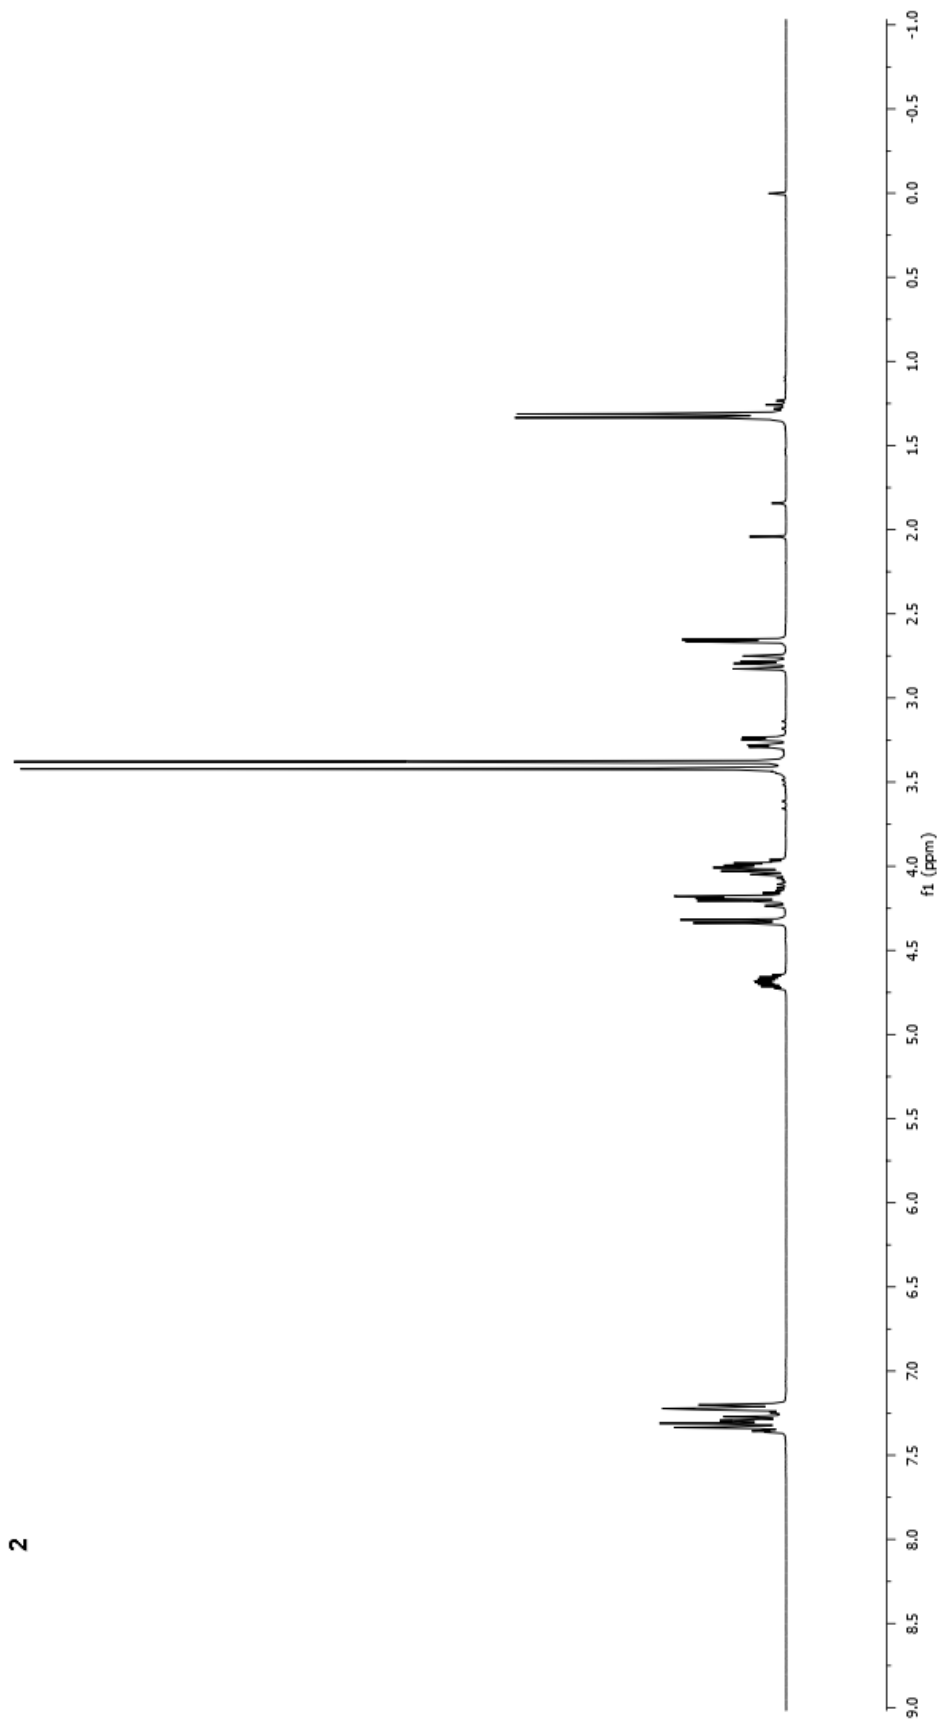

$^{13}\text{C}$  NMR (125MHz,  $\text{CDCl}_3$ )

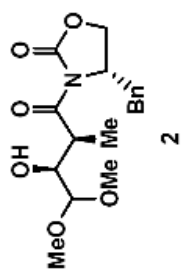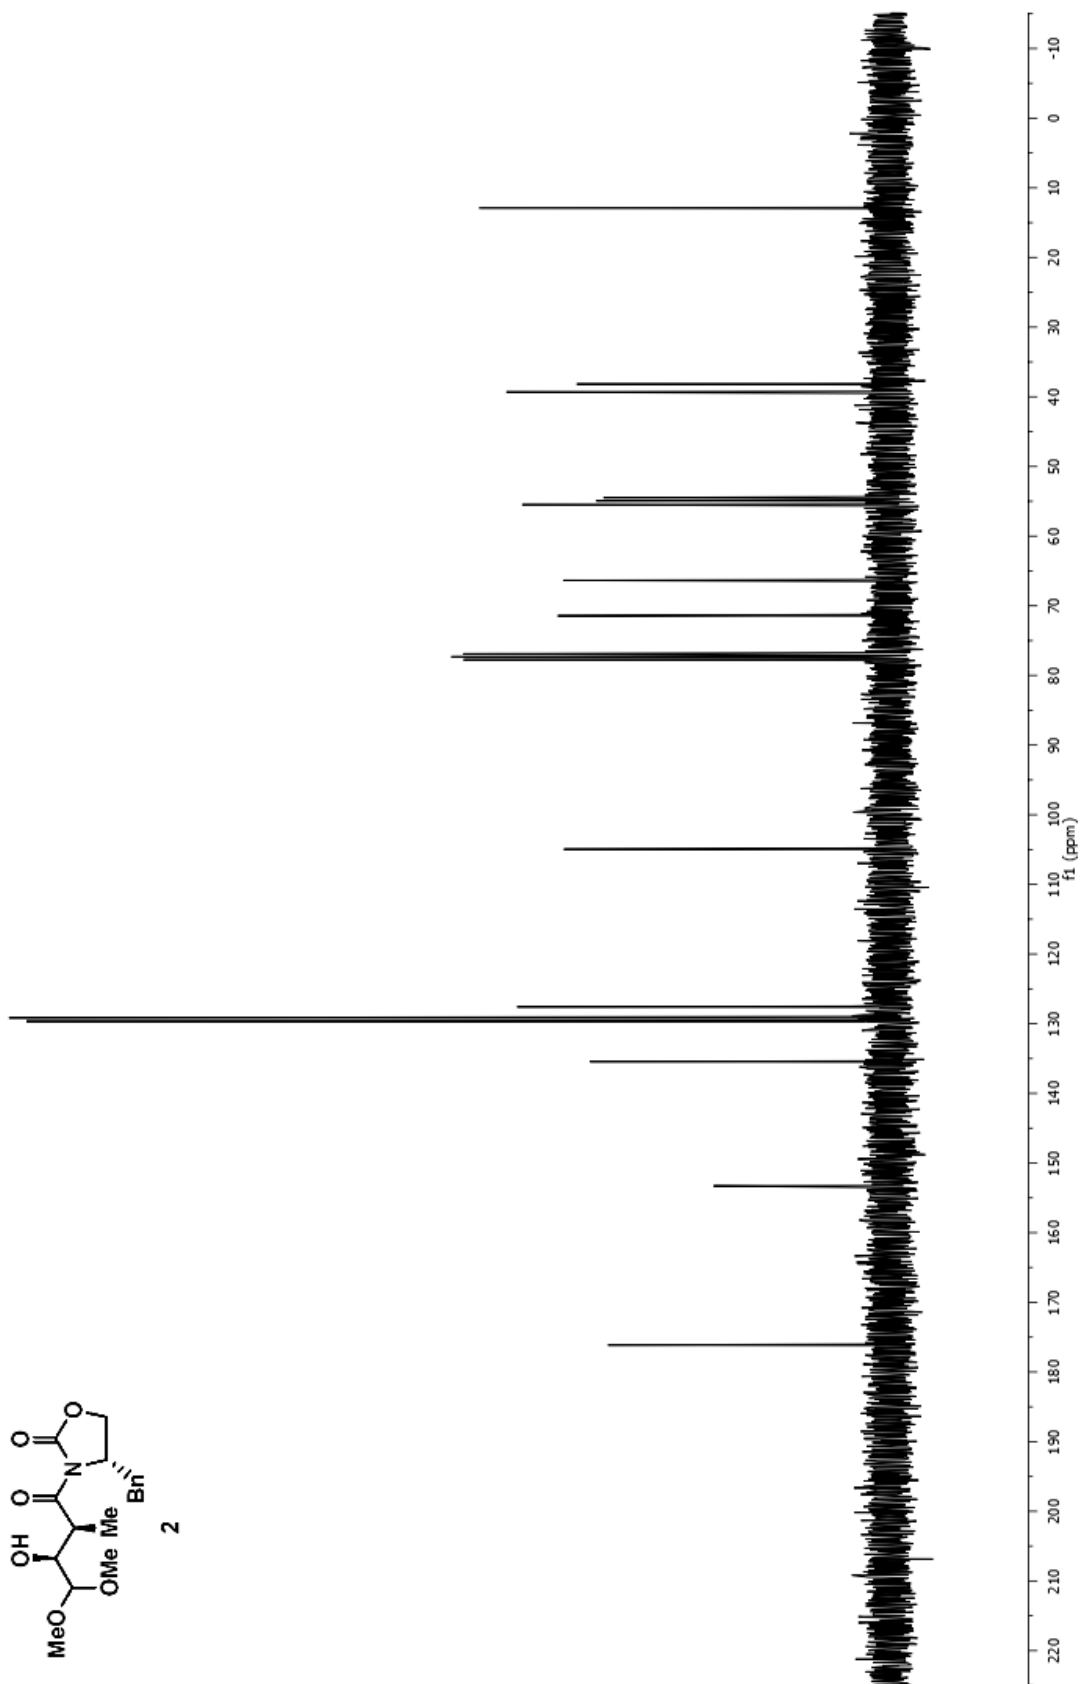



$^{13}\text{C}$  NMR (125MHz,  $\text{CDCl}_3$ )

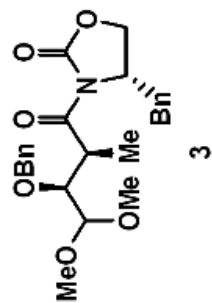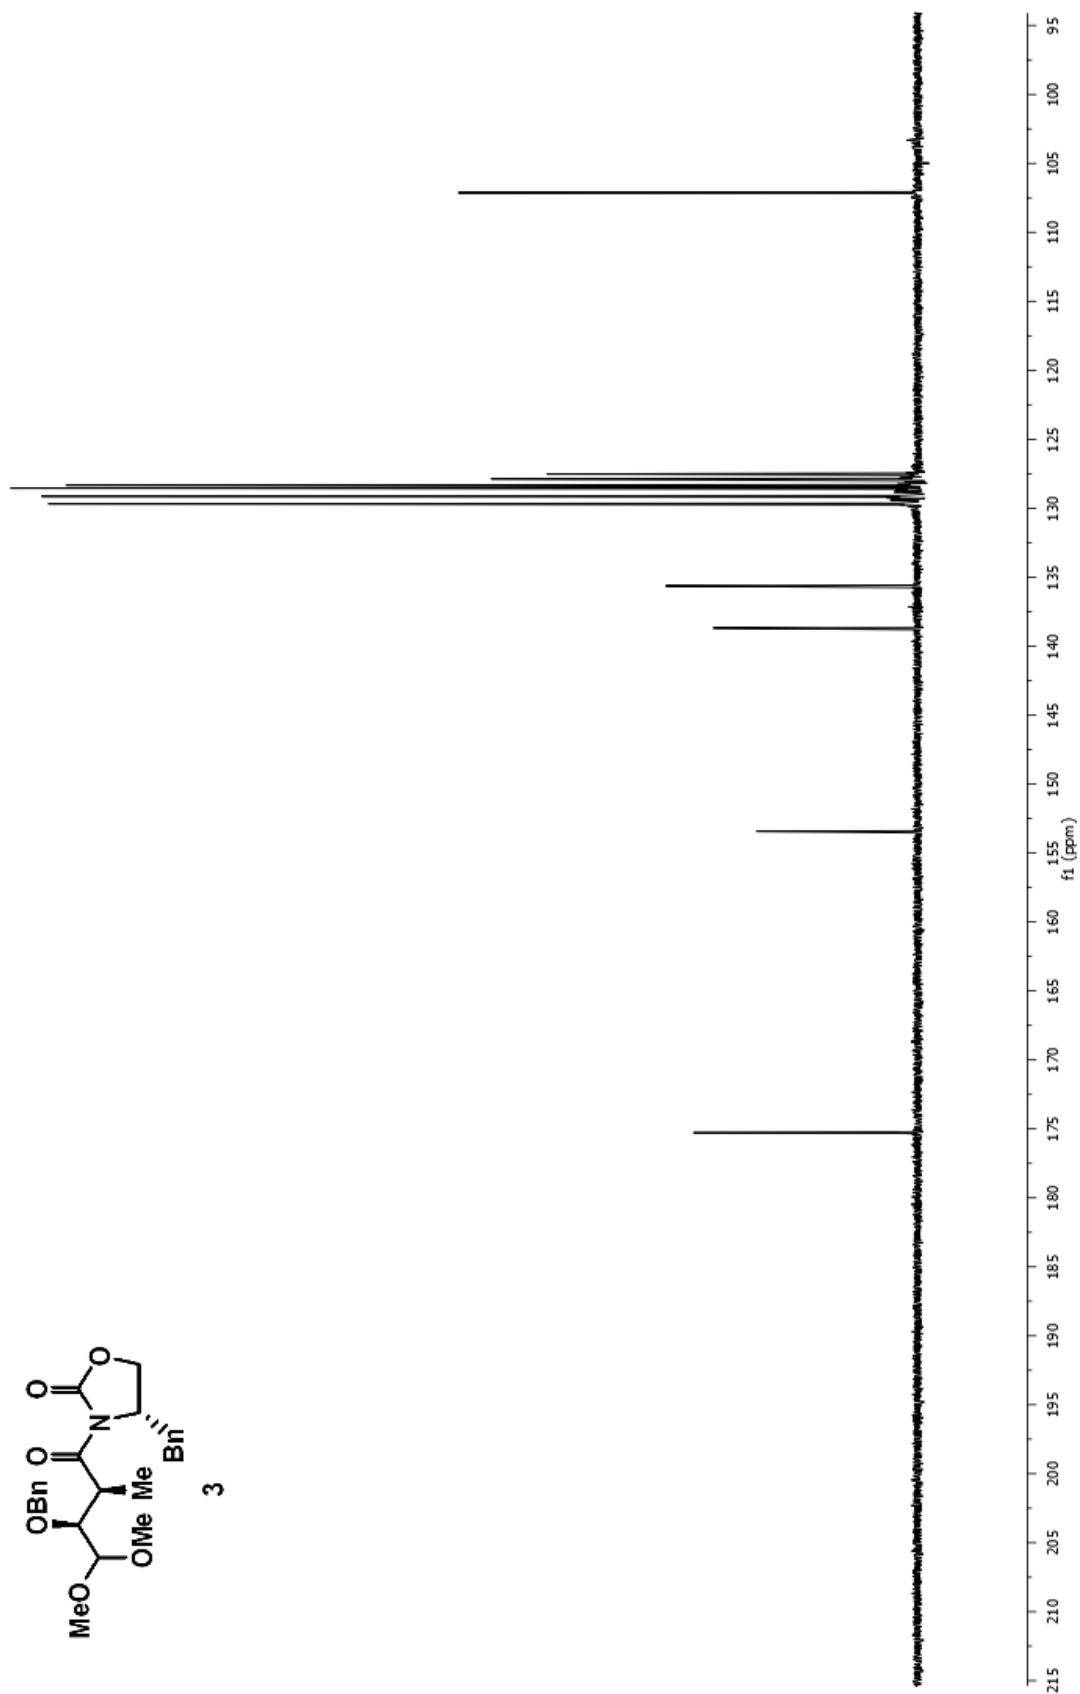



<sup>1</sup>H NMR (500MHz, CDCl<sub>3</sub>)

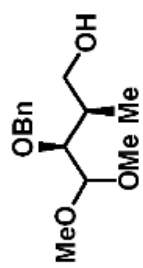

4

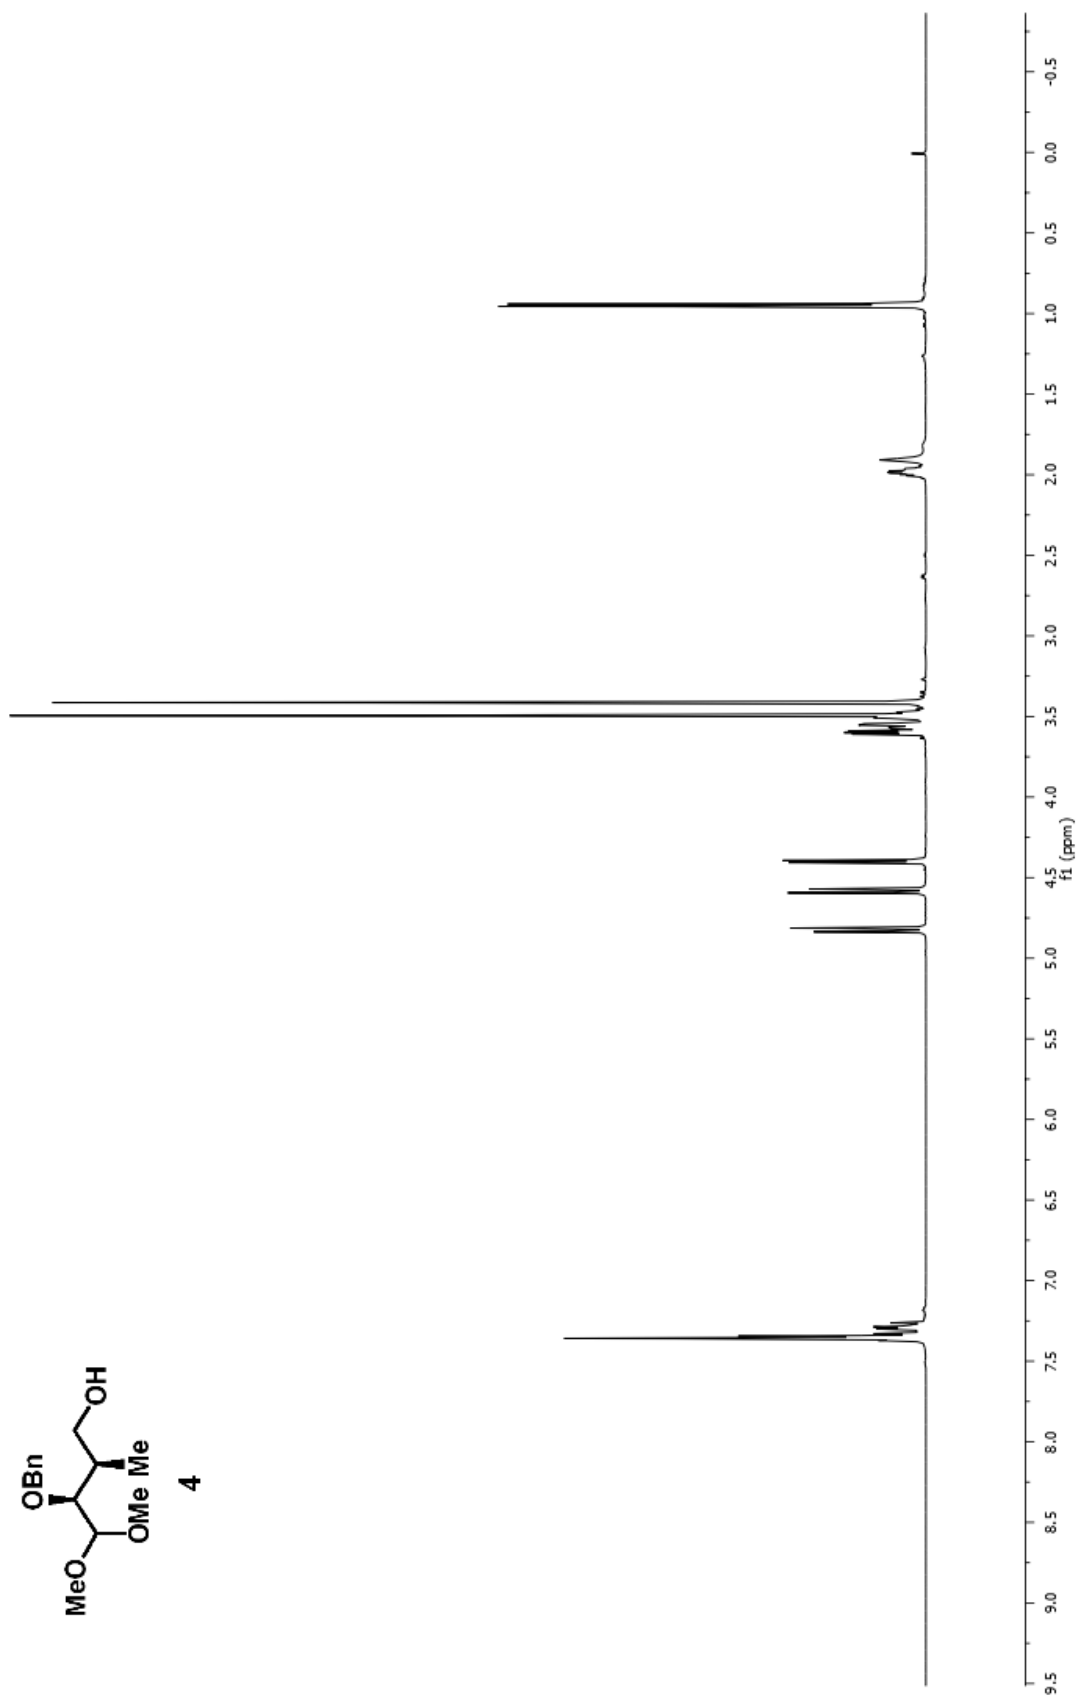

$^{13}\text{C}$  NMR (125MHz,  $\text{CDCl}_3$ )

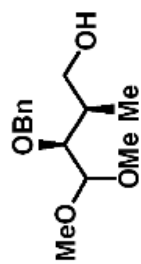

4

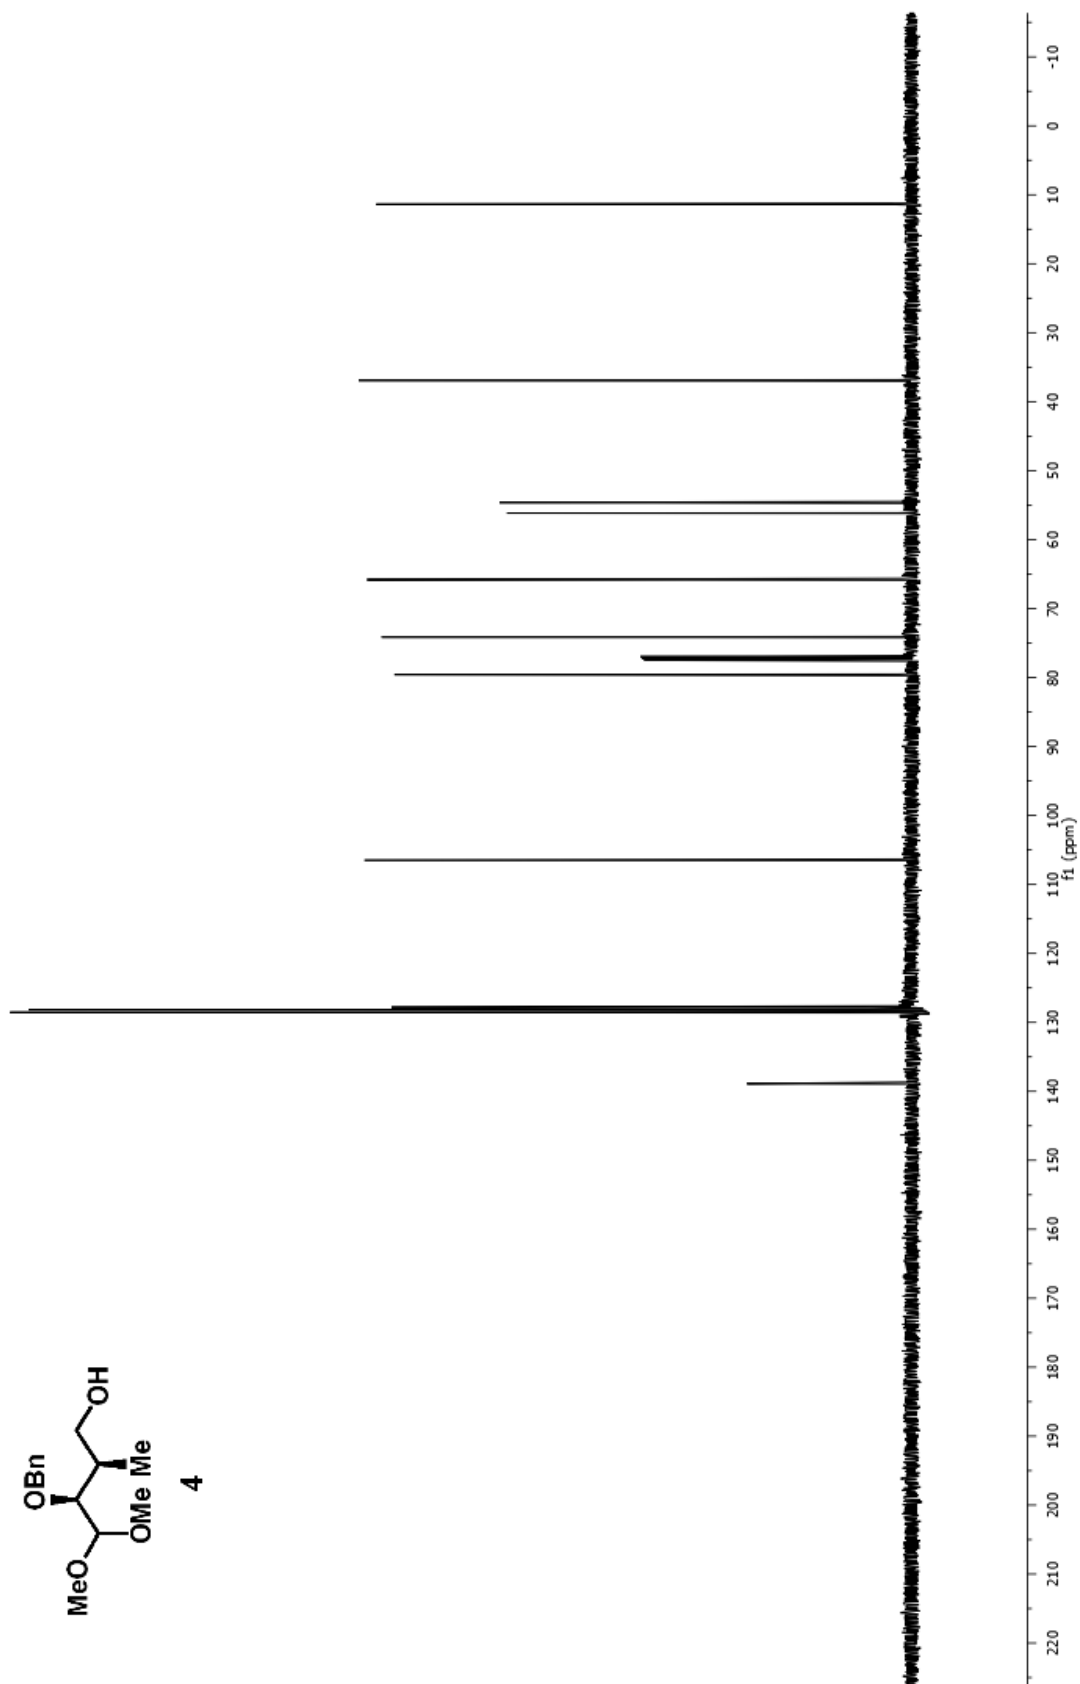

<sup>1</sup>H NMR (500MHz, CDCl<sub>3</sub>)

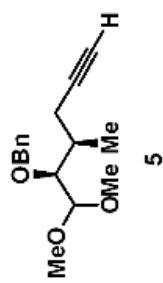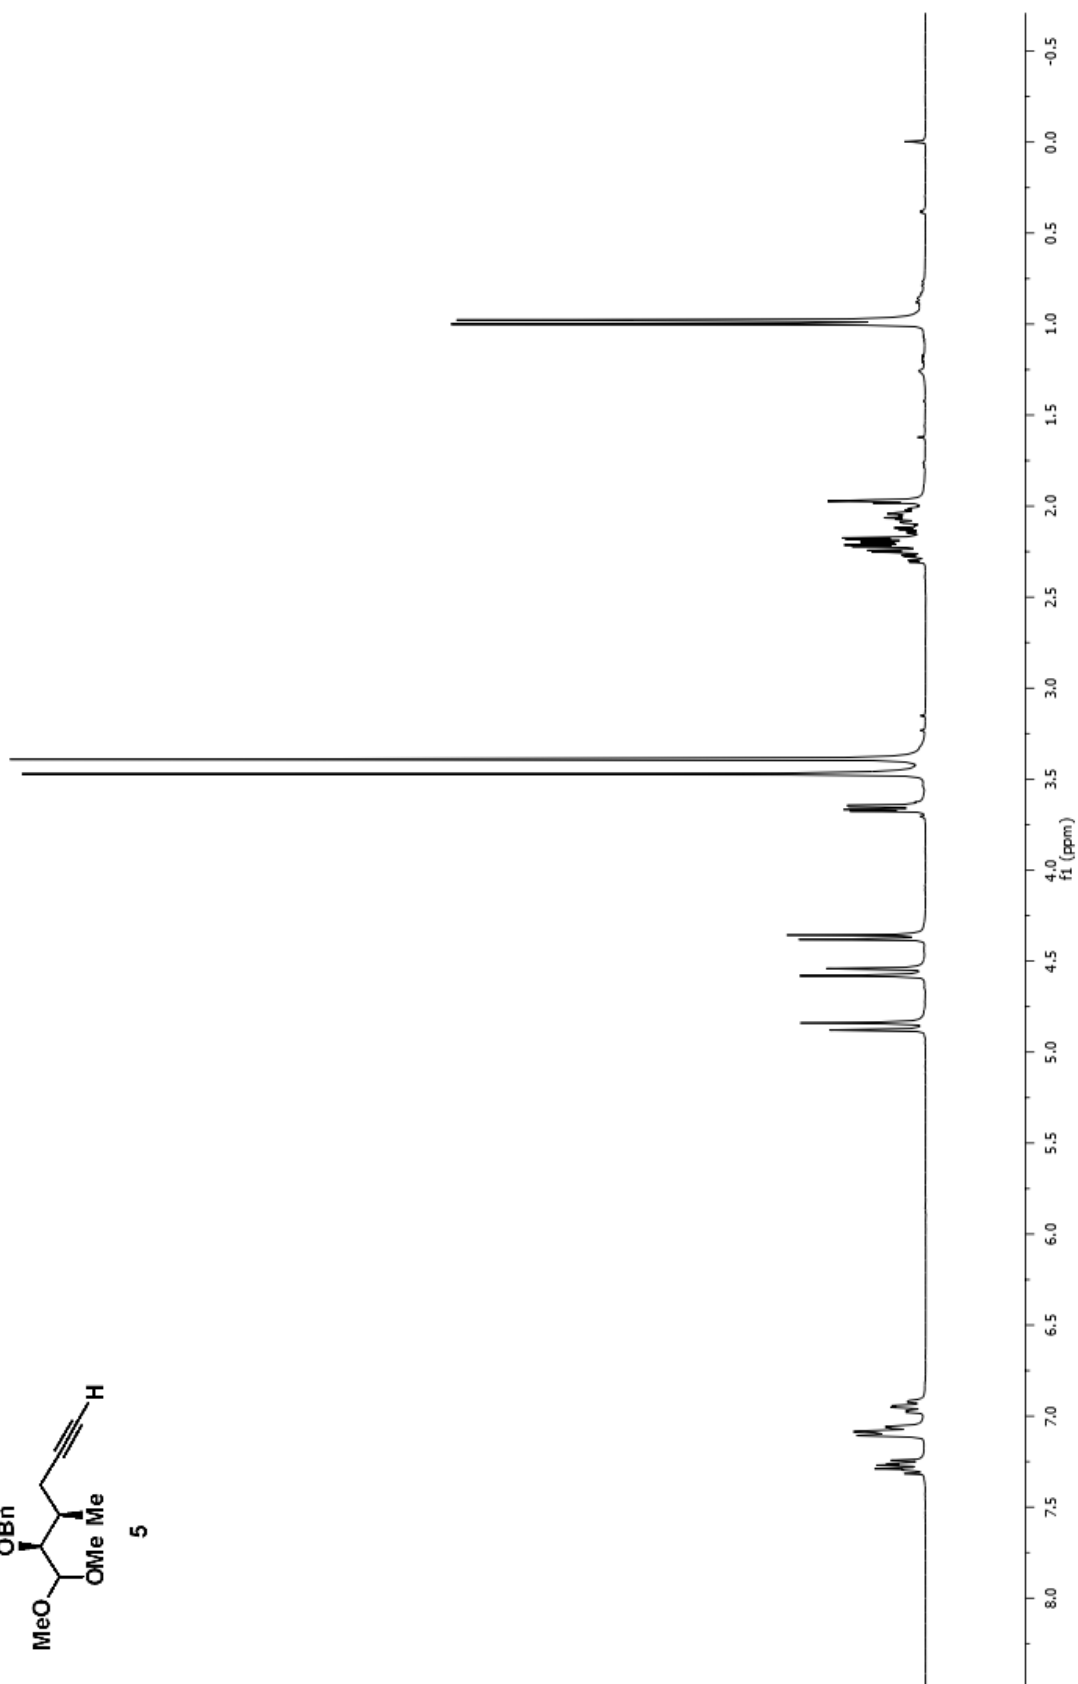

<sup>13</sup>C NMR (125MHz, CDCl<sub>3</sub>)

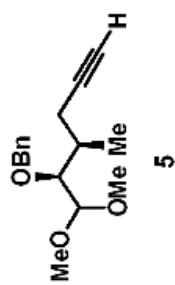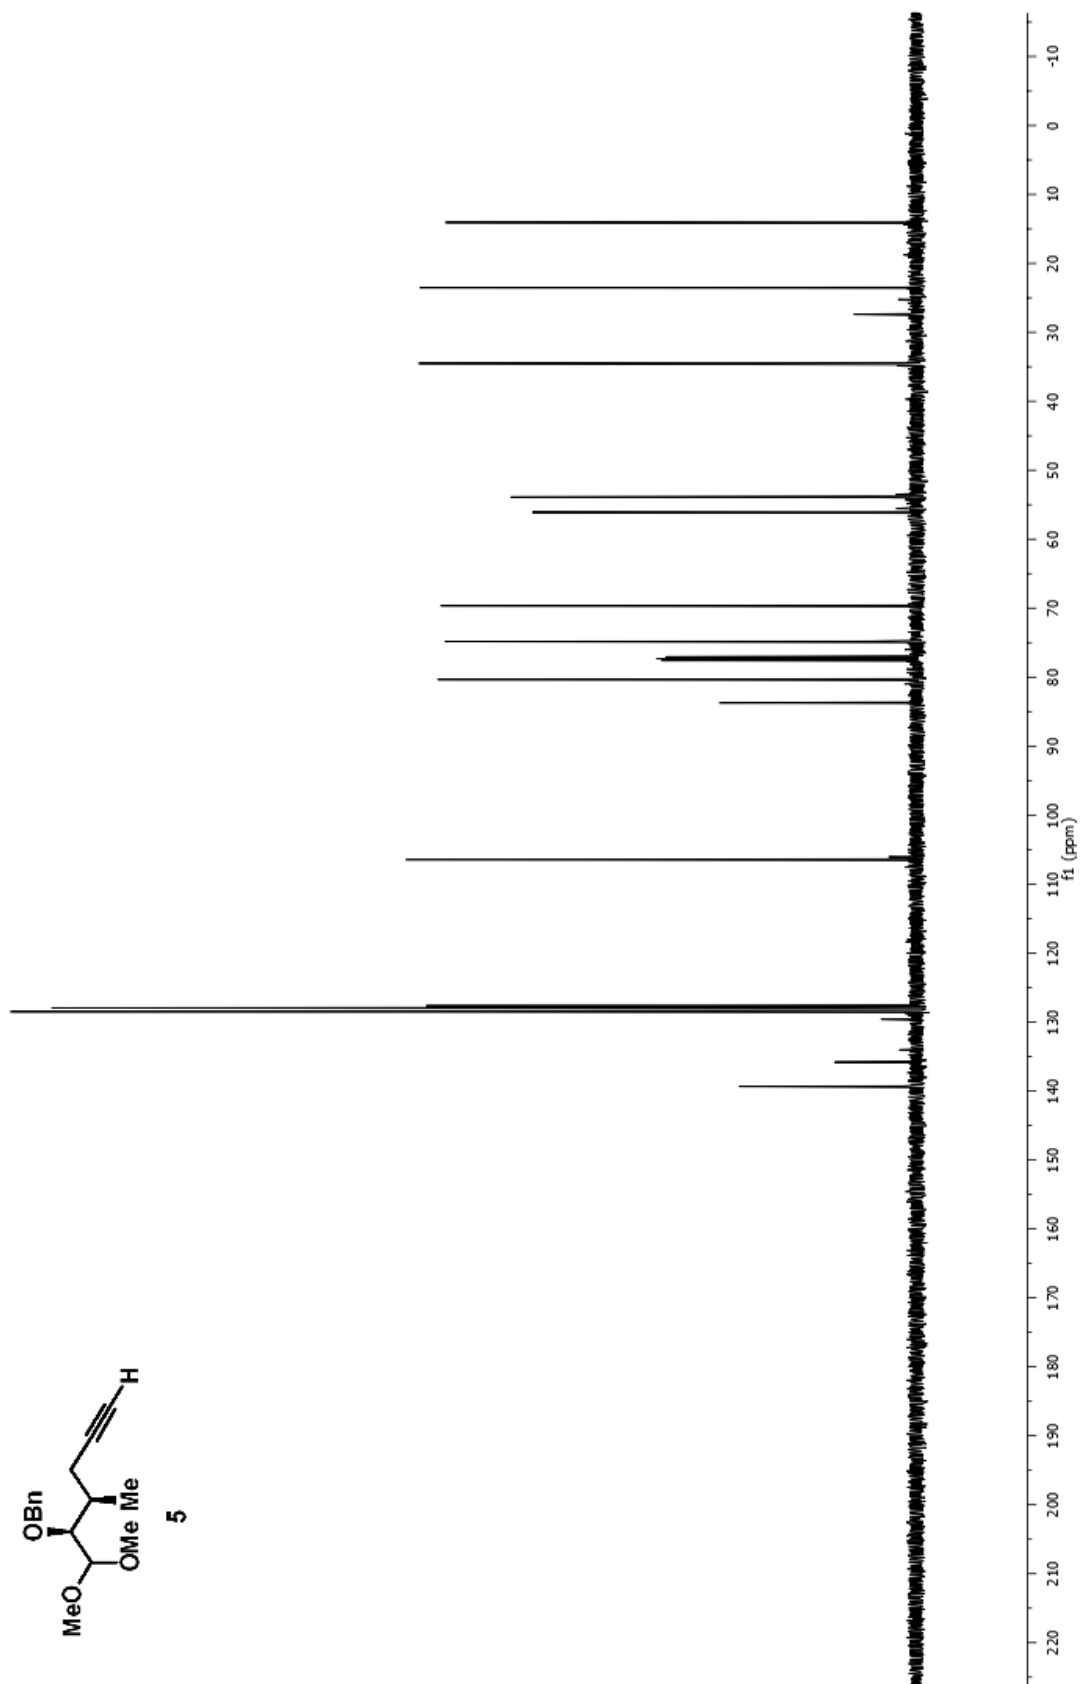

<sup>1</sup>H NMR (500MHz, CDCl<sub>3</sub>)

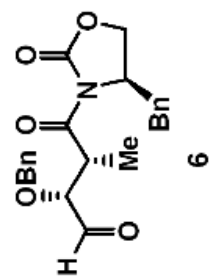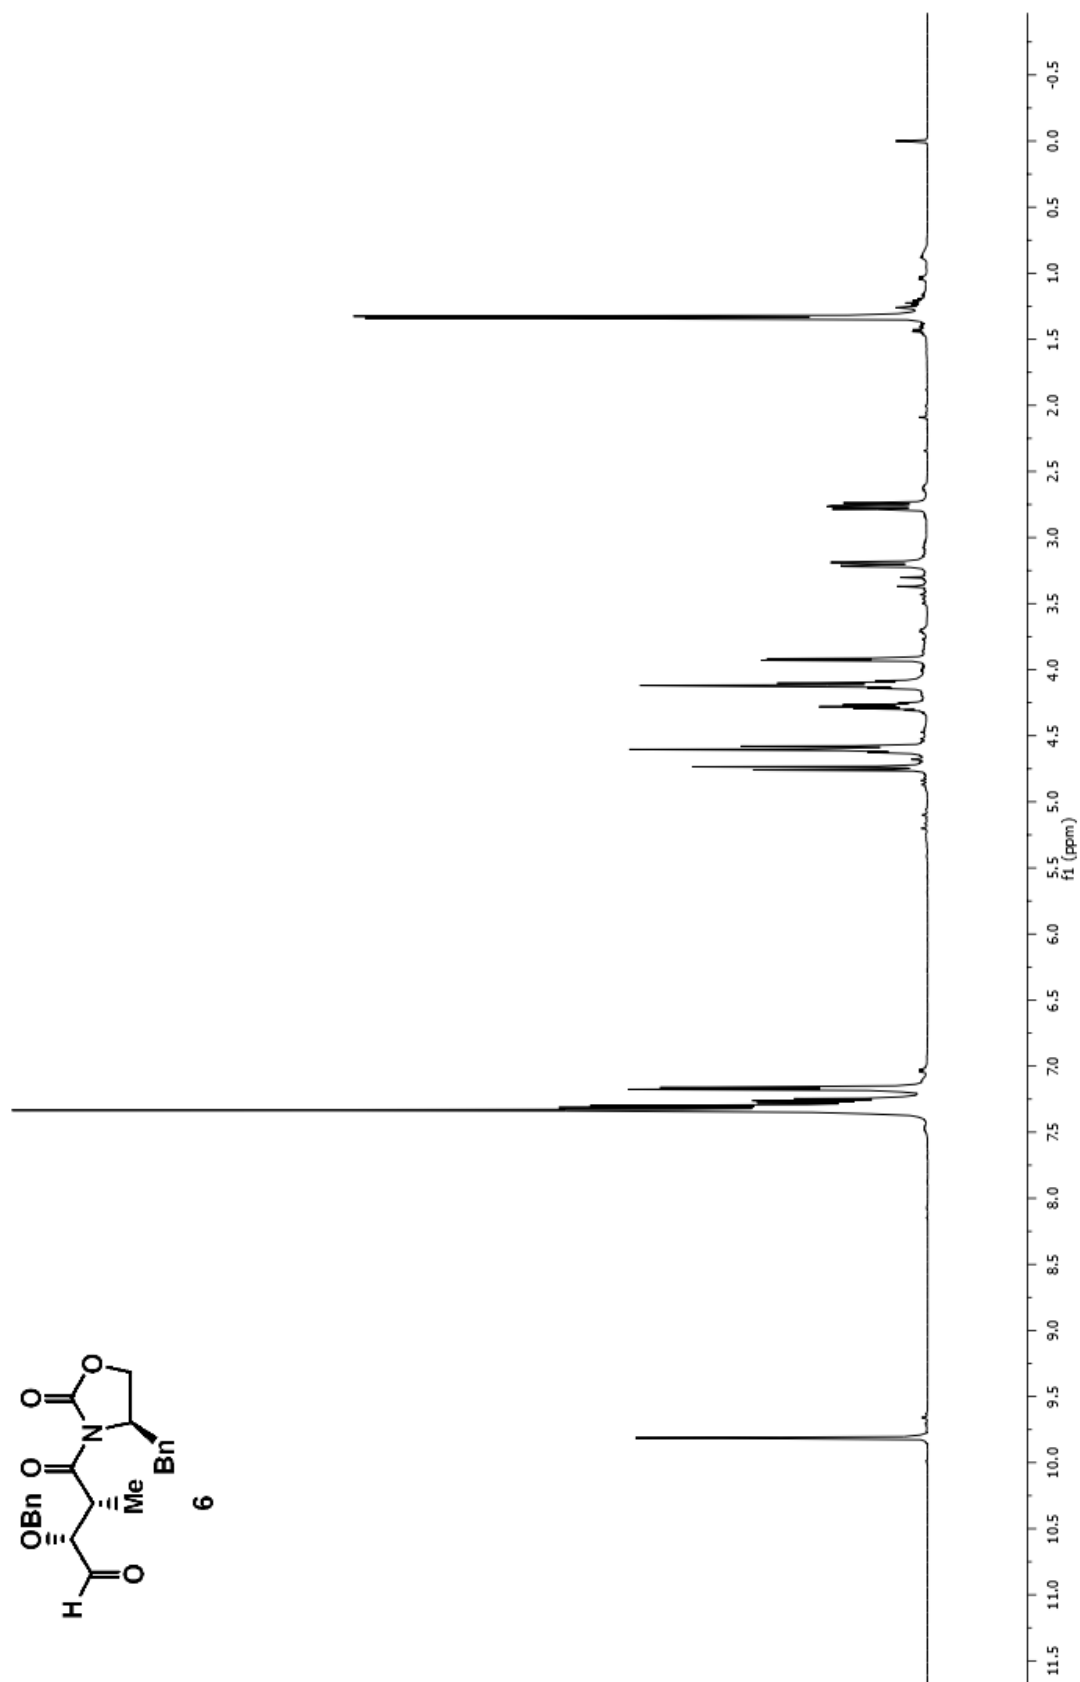

$^{13}\text{C}$  NMR (125MHz,  $\text{CDCl}_3$ )

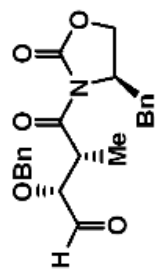

6

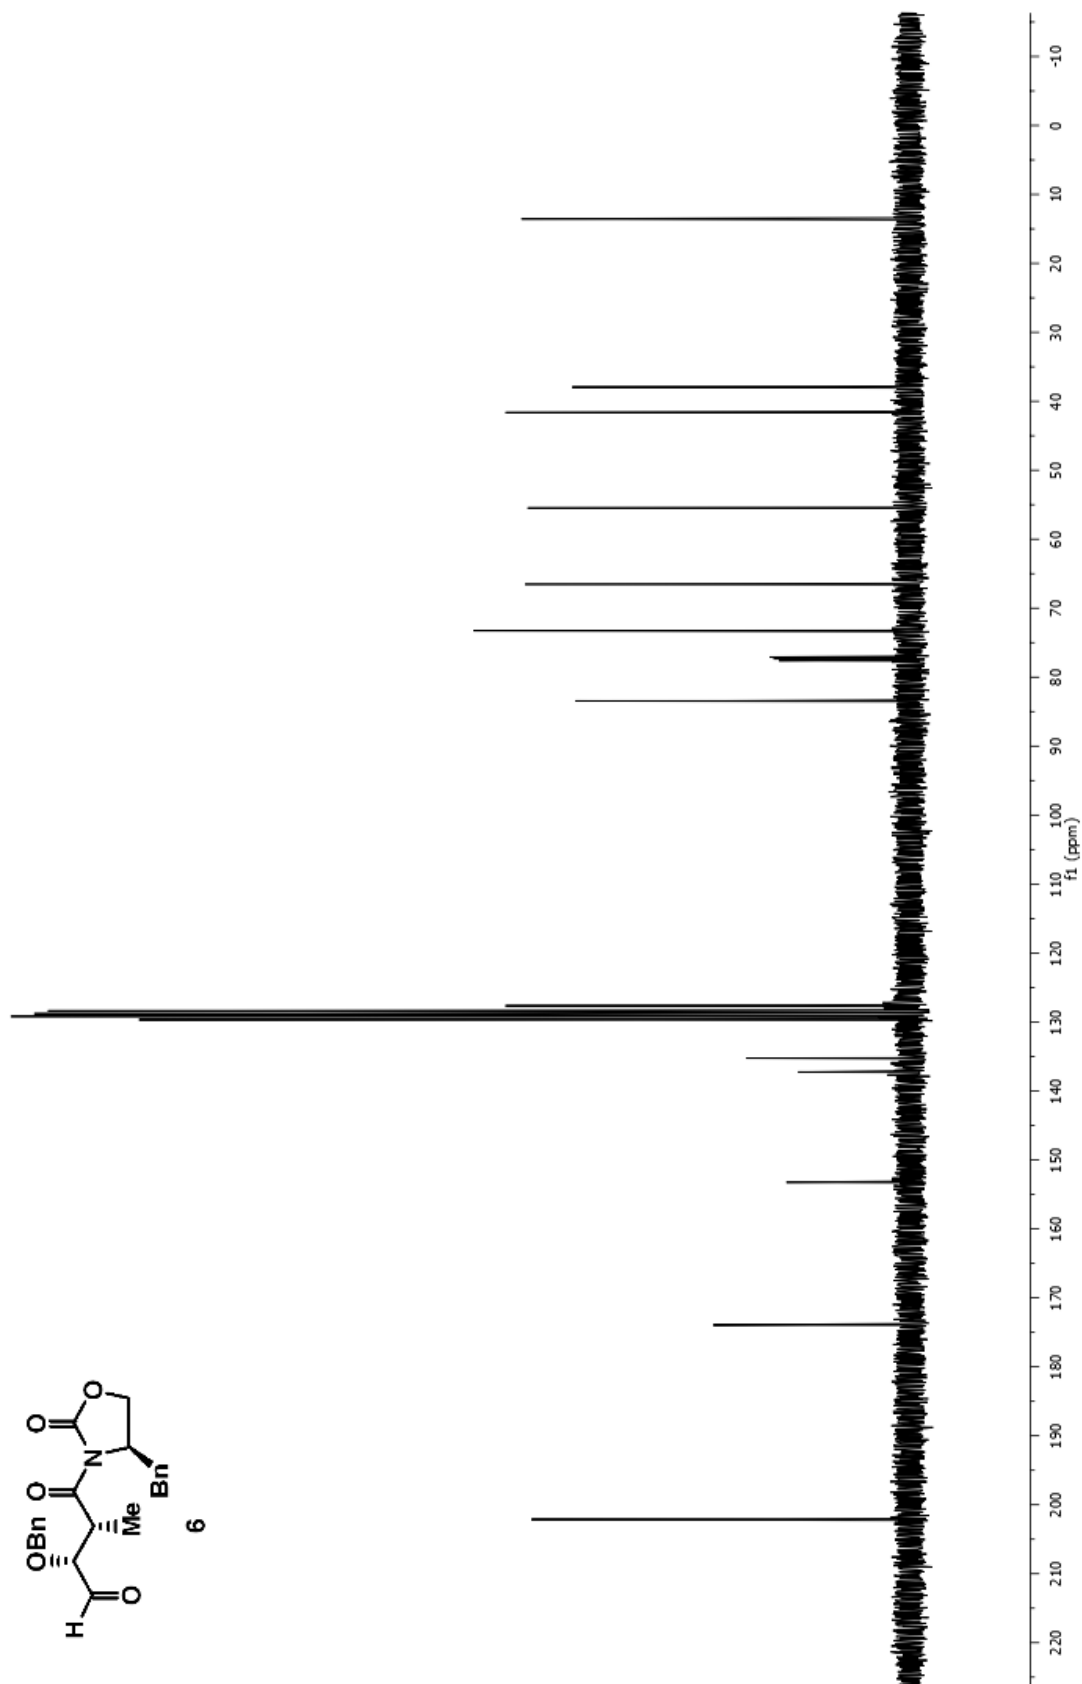

<sup>1</sup>H NMR (500MHz, CDCl<sub>3</sub>)

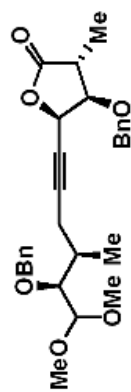

7

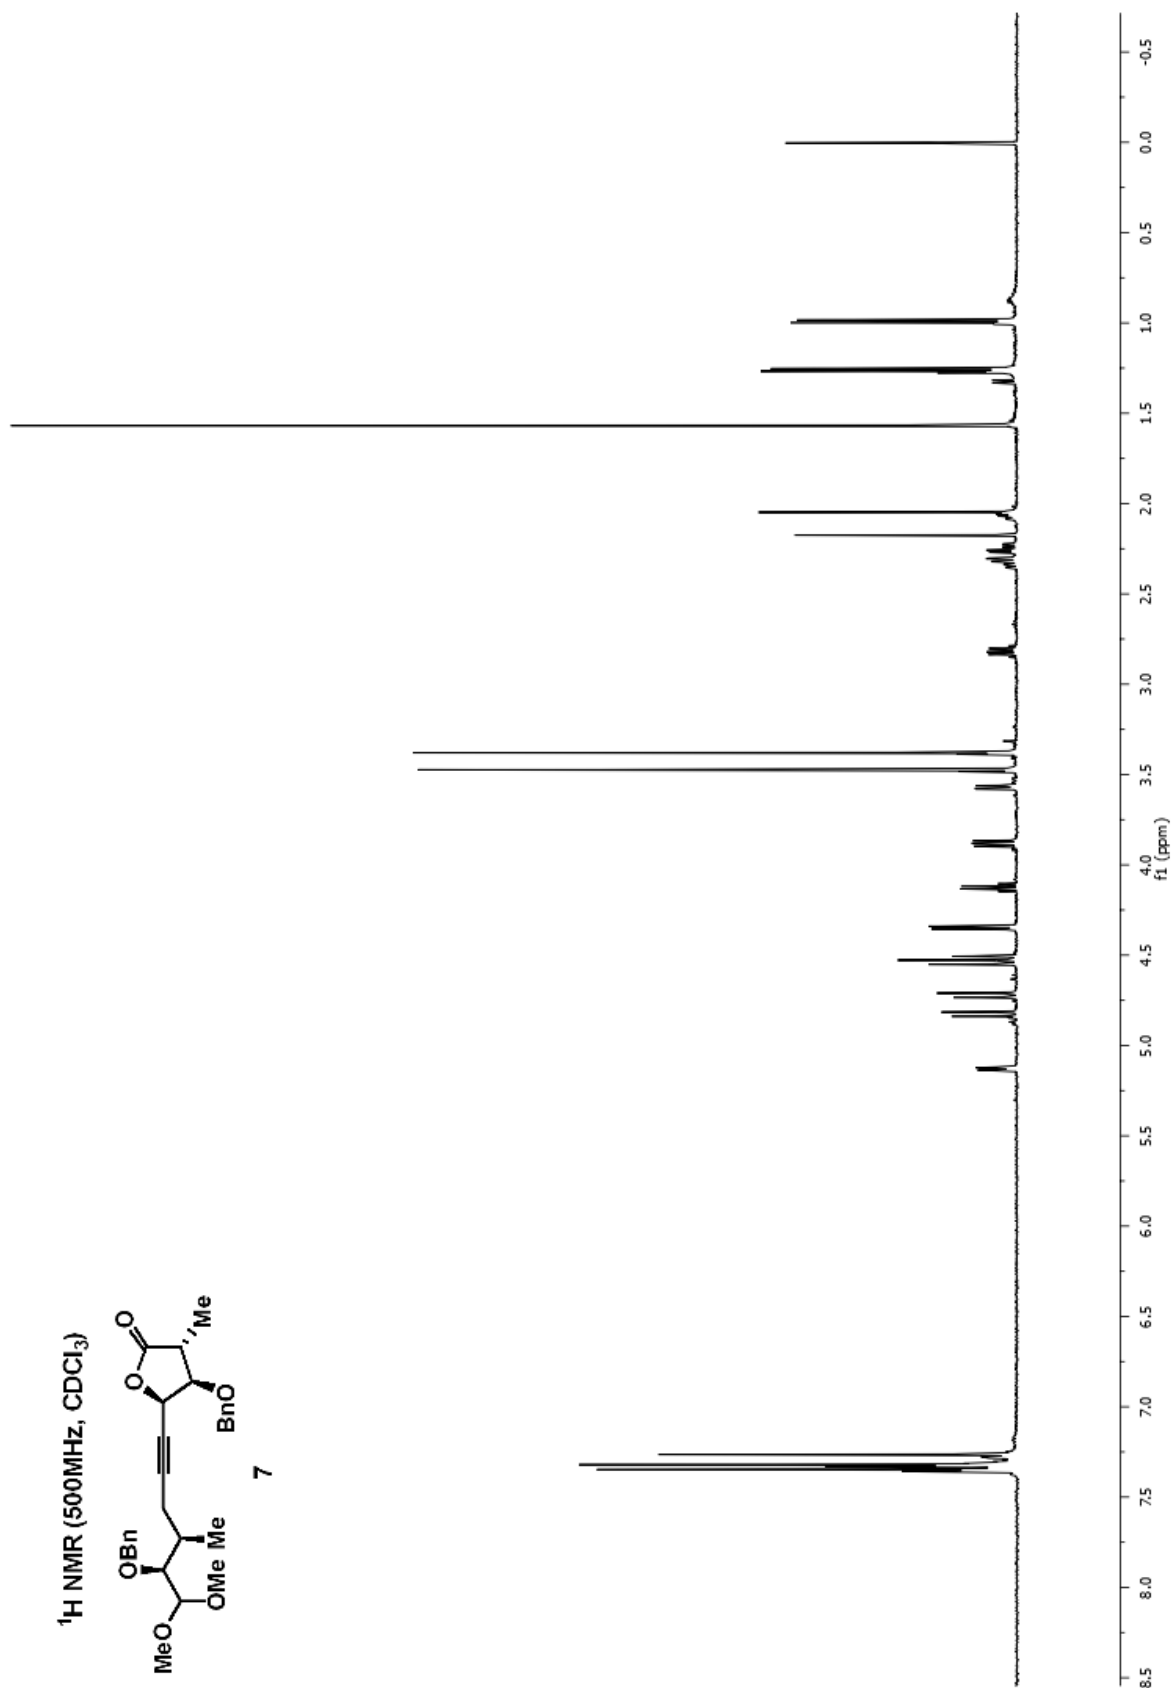

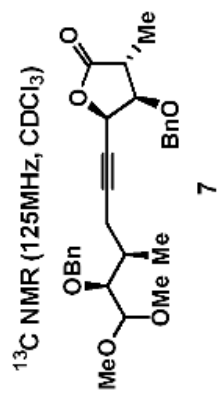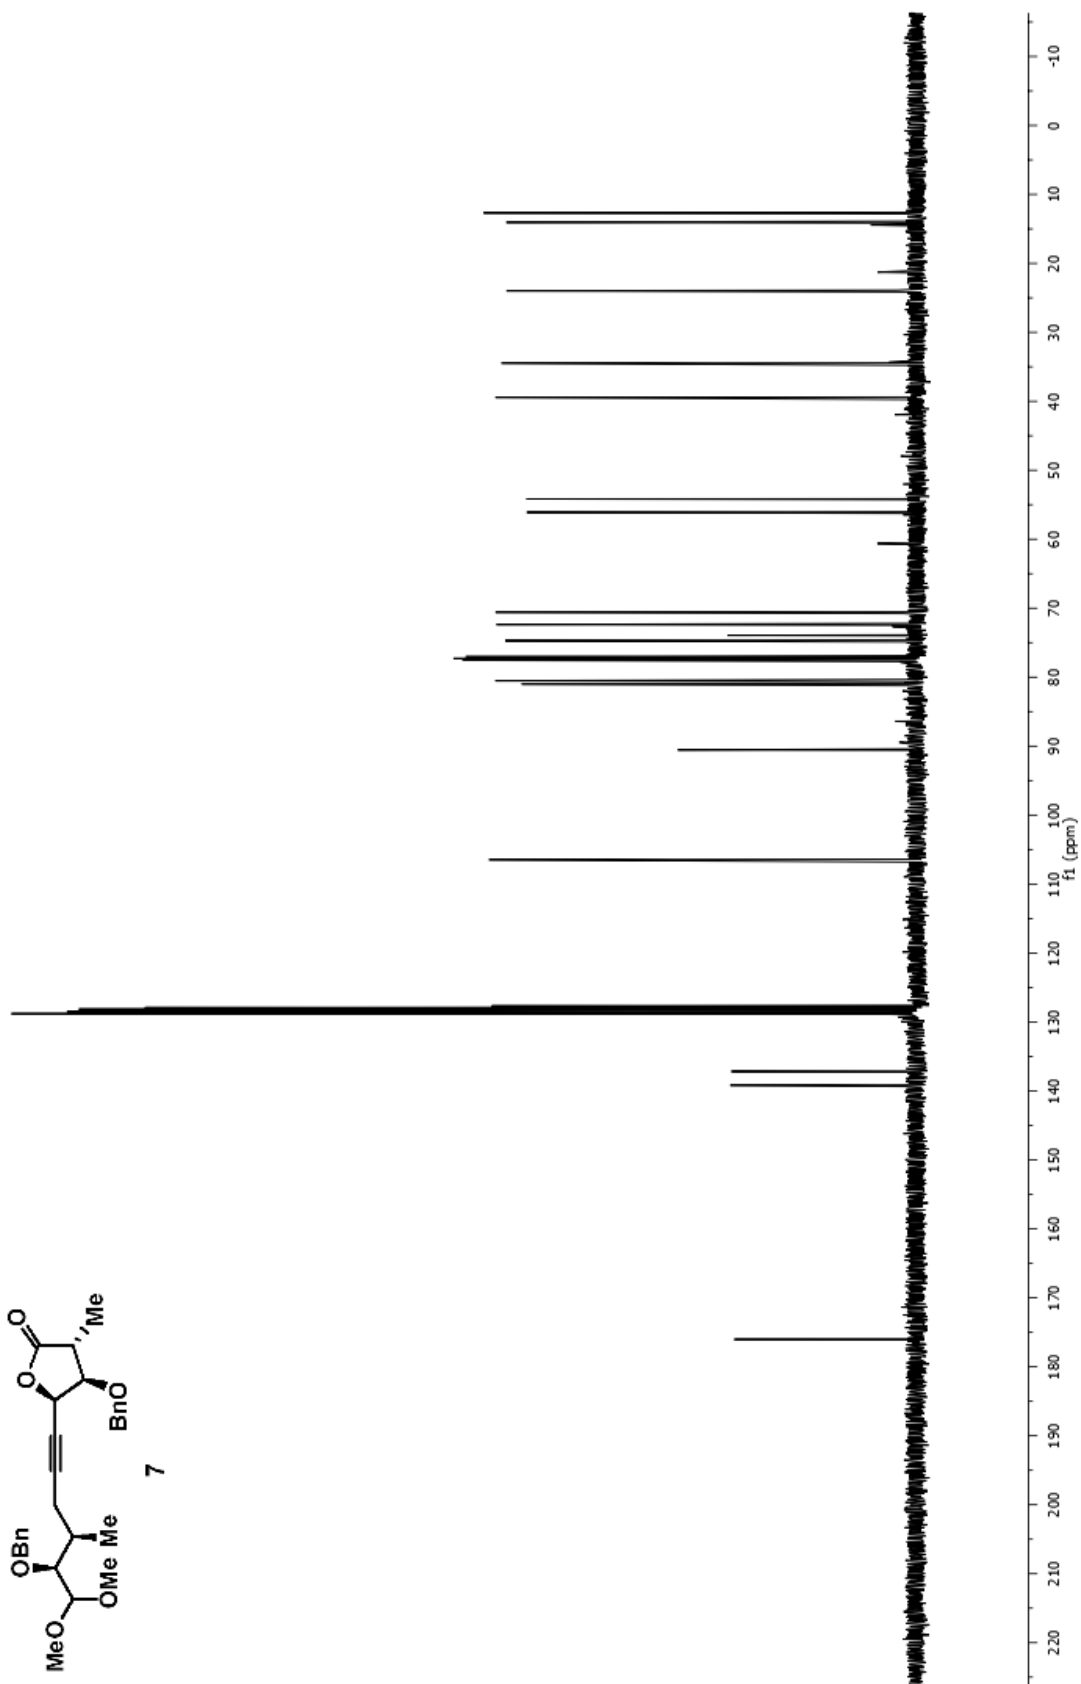





<sup>13</sup>C NMR (125MHz, CDCl<sub>3</sub>)

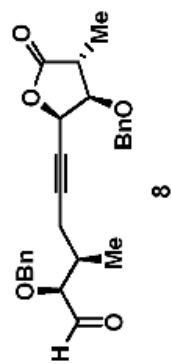

8

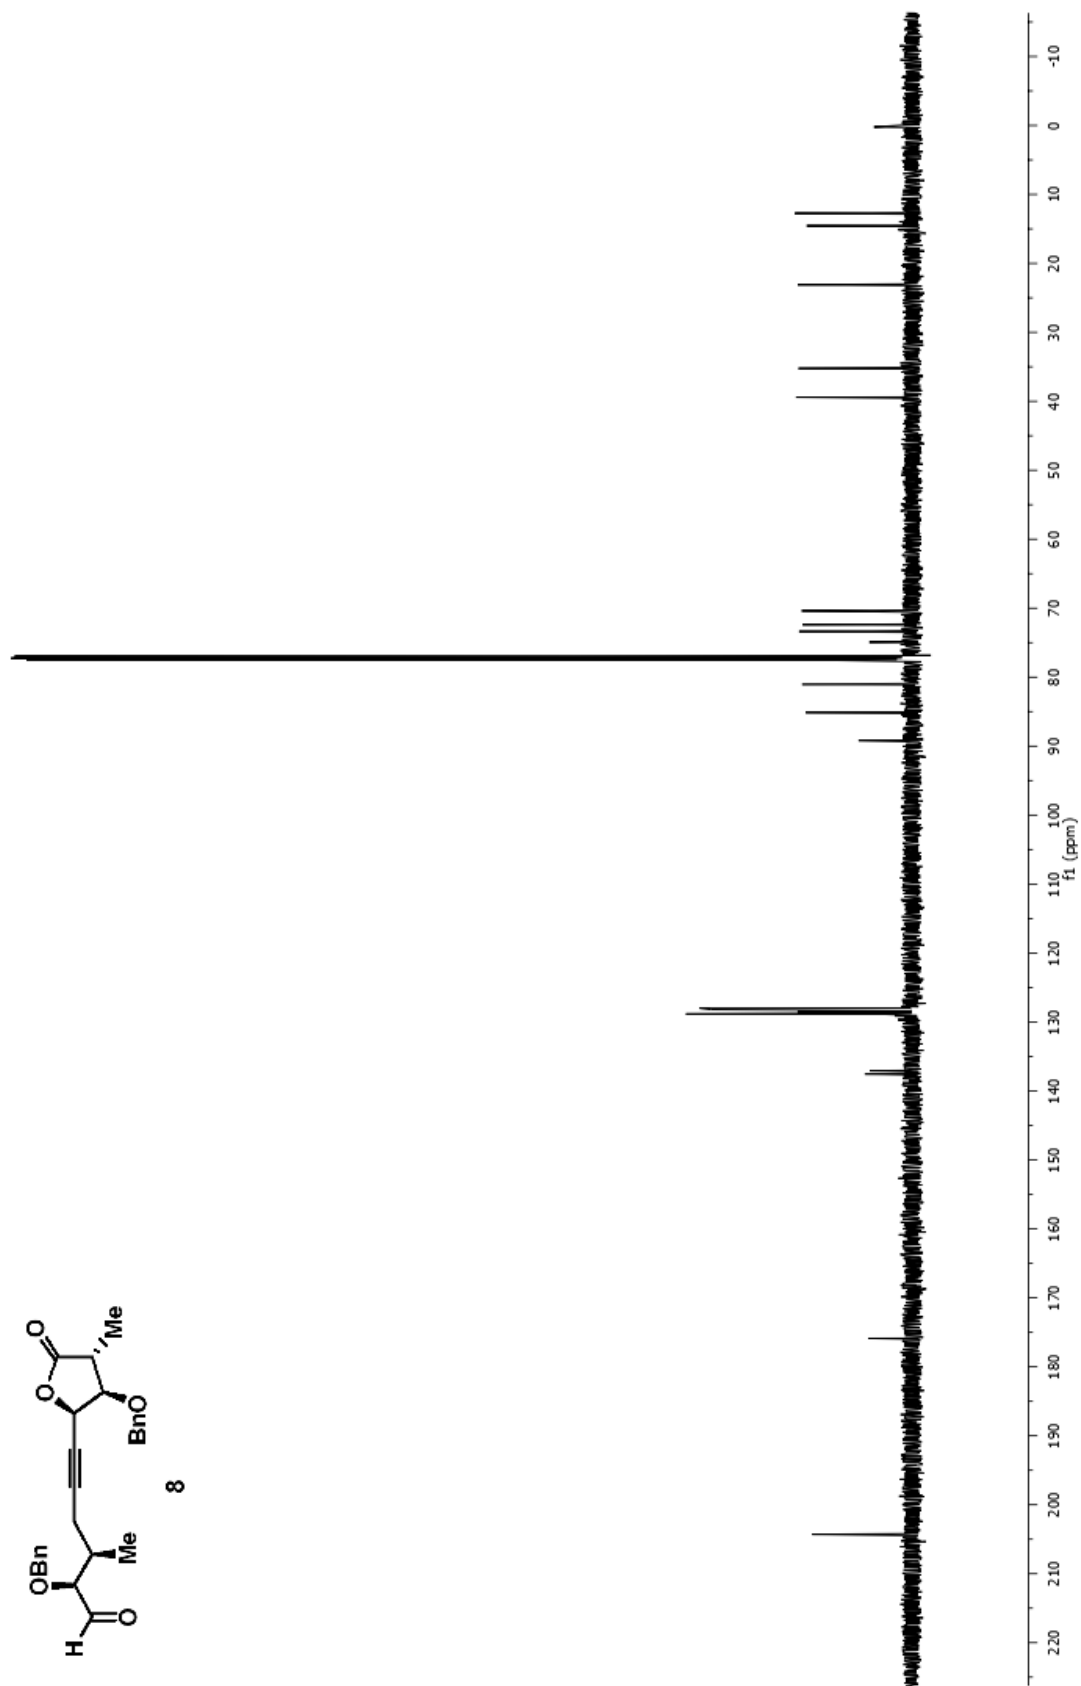

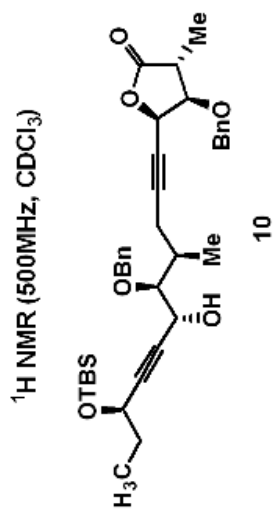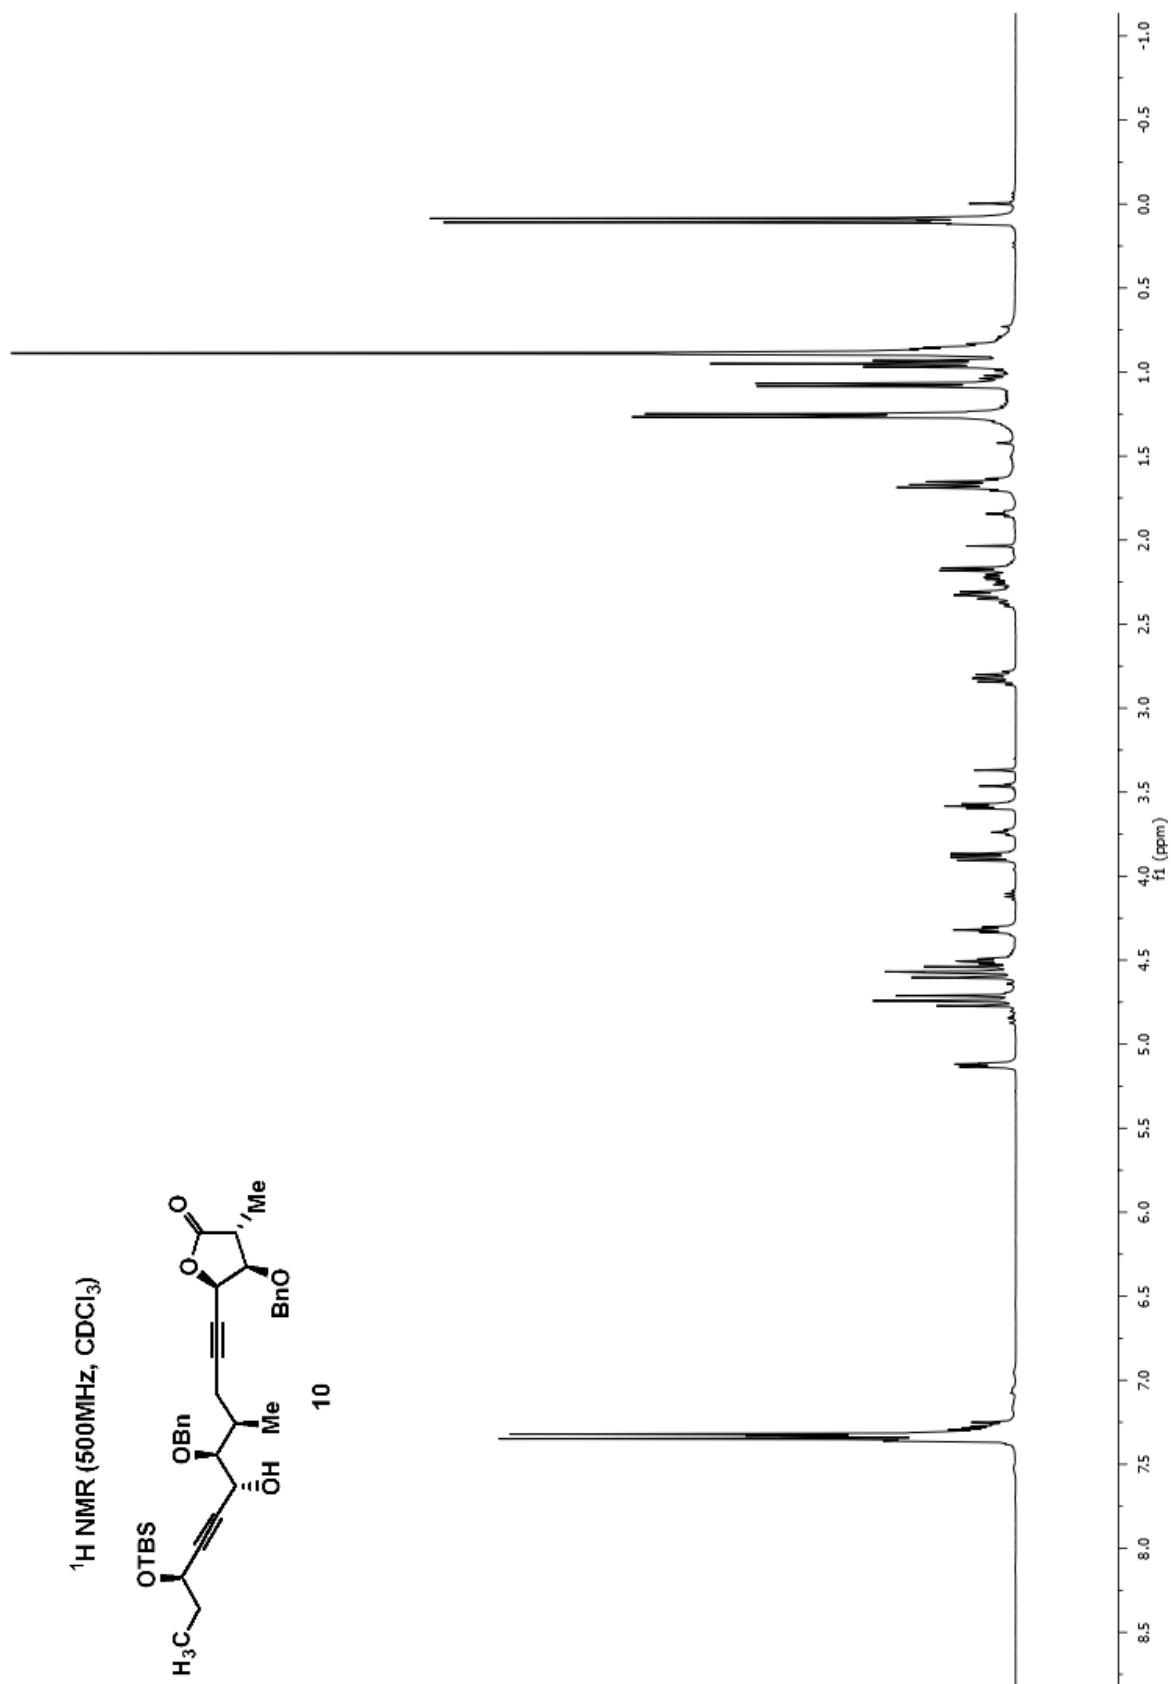

$^{13}\text{C}$  NMR (125MHz,  $\text{CDCl}_3$ )

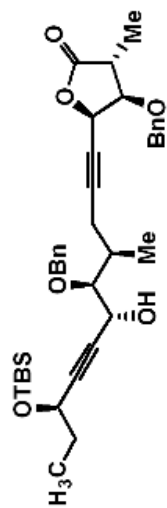

10

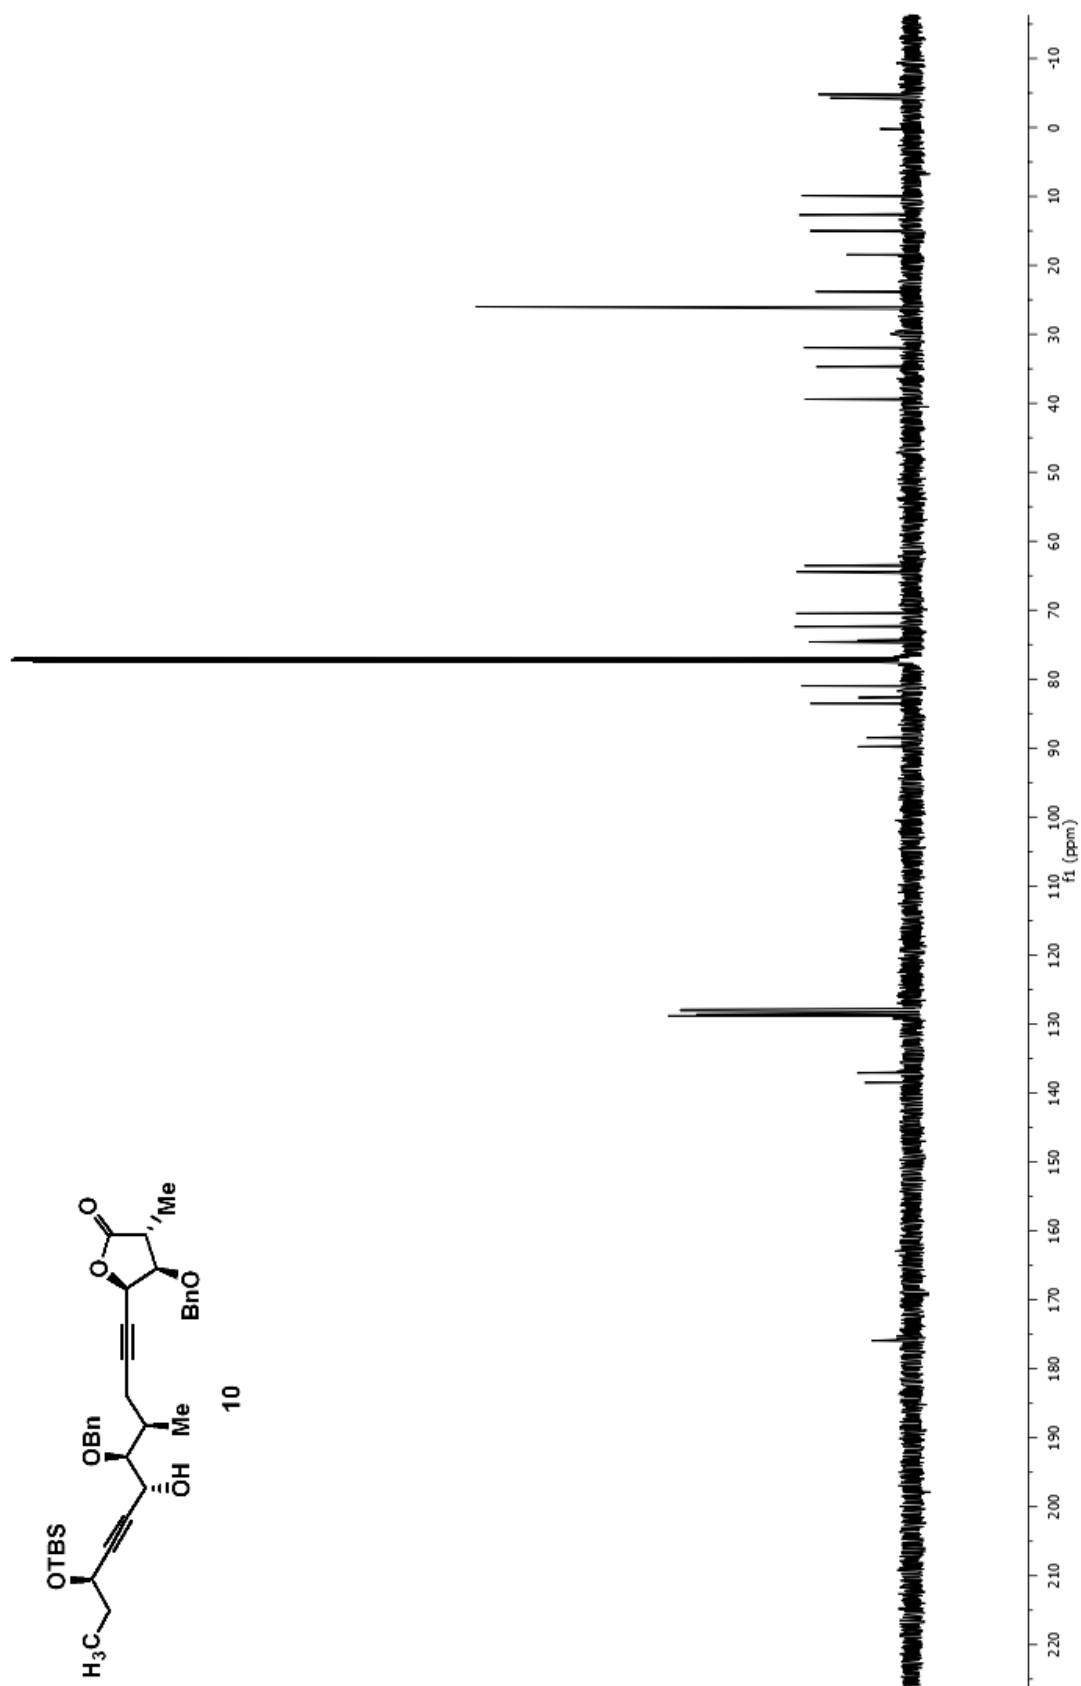

<sup>1</sup>H NMR (500MHz, CDCl<sub>3</sub>)

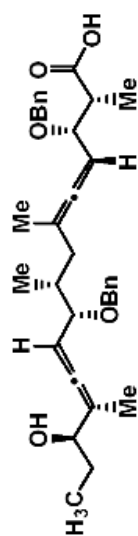

11

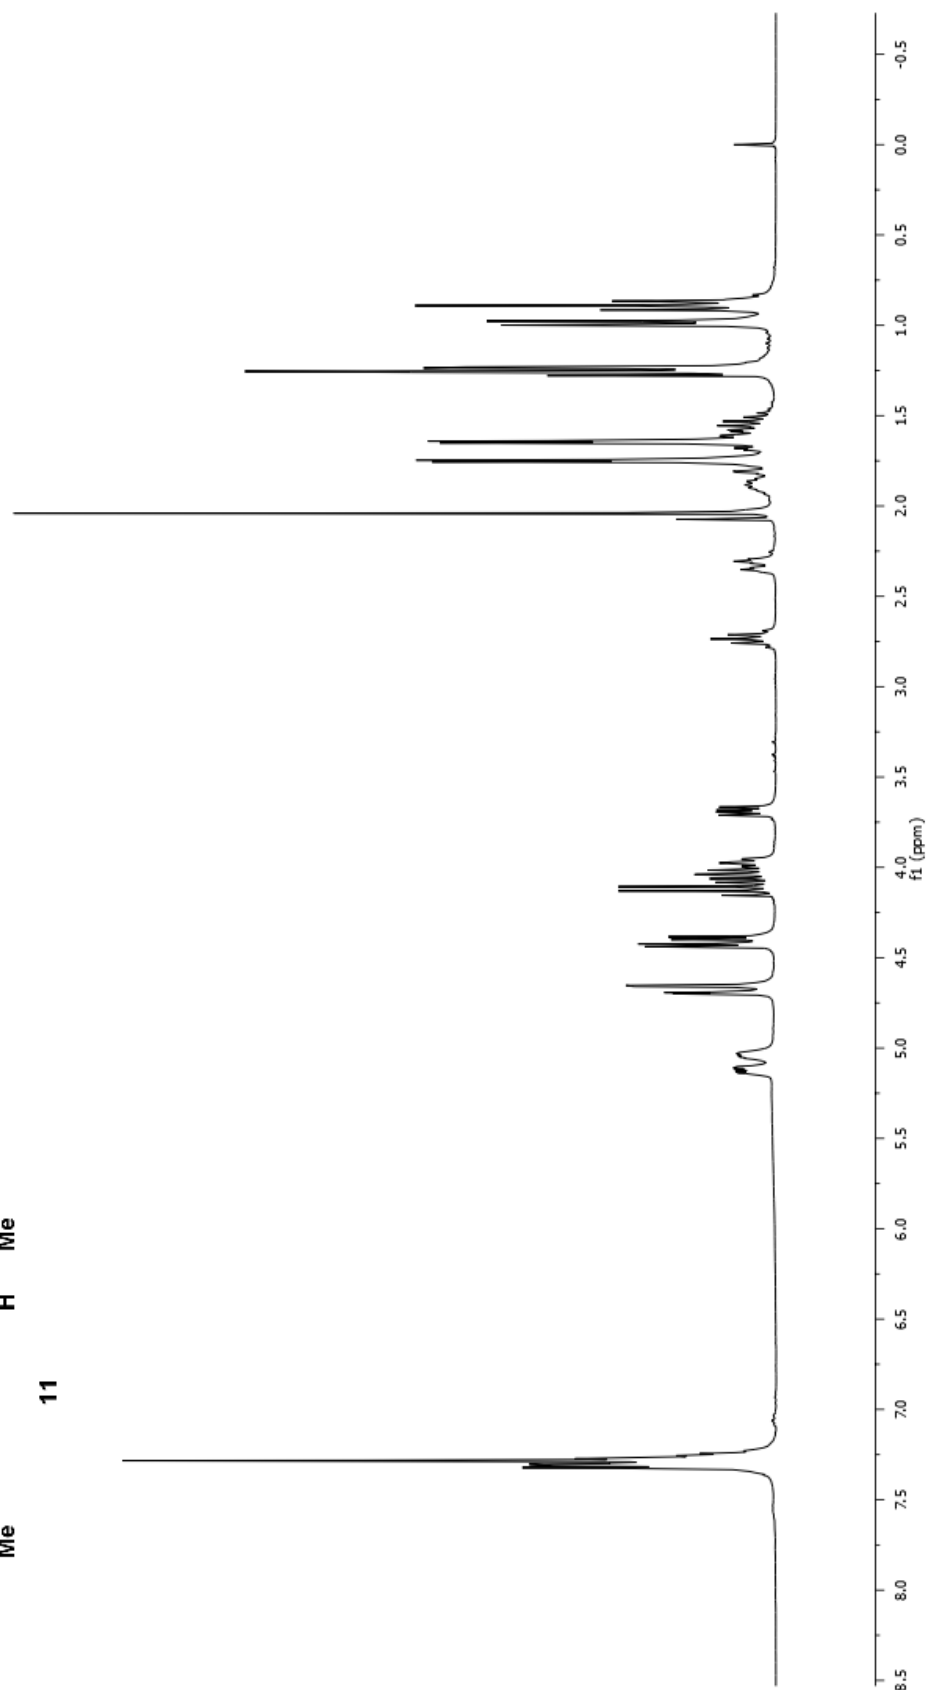

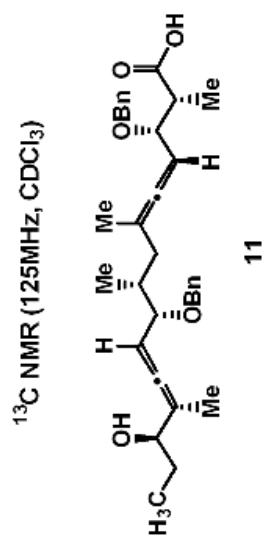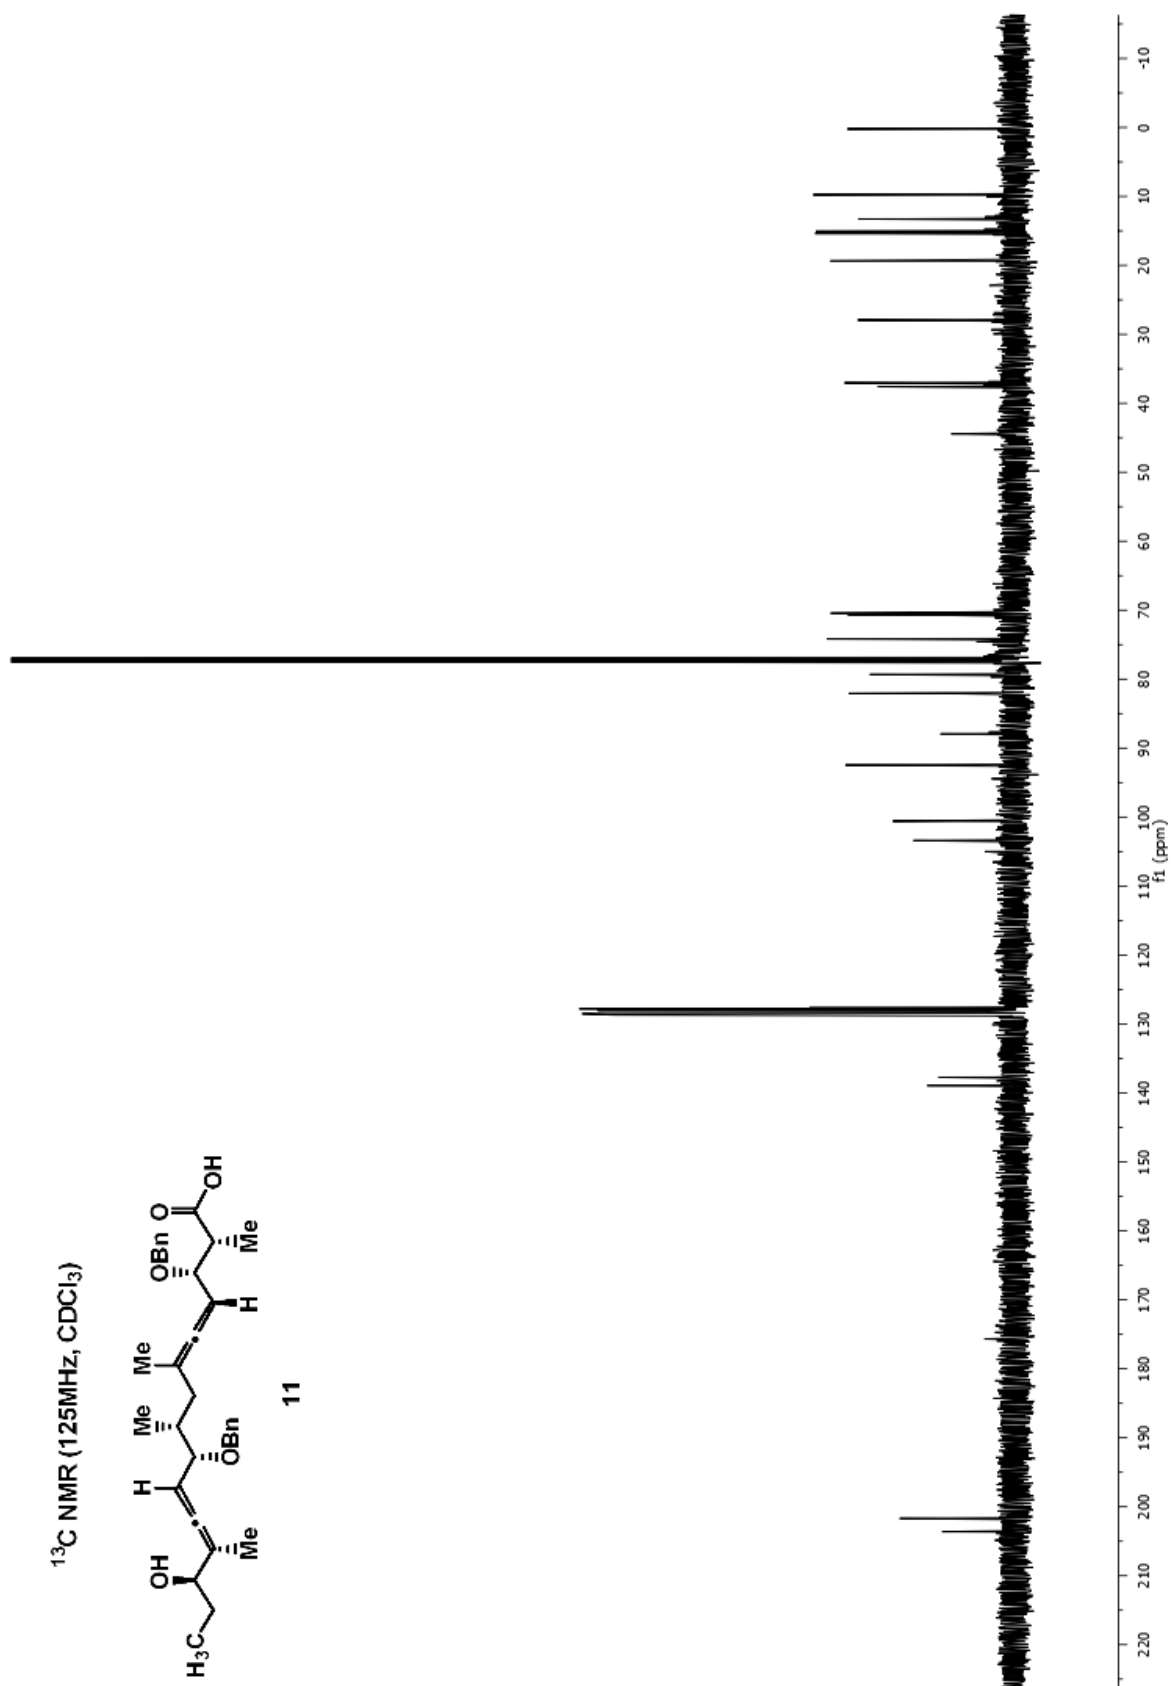

$^1\text{H}$  NMR (500MHz,  $\text{CDCl}_3$ )

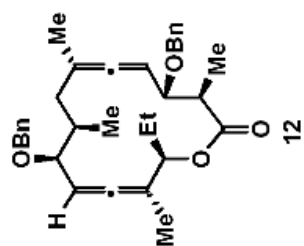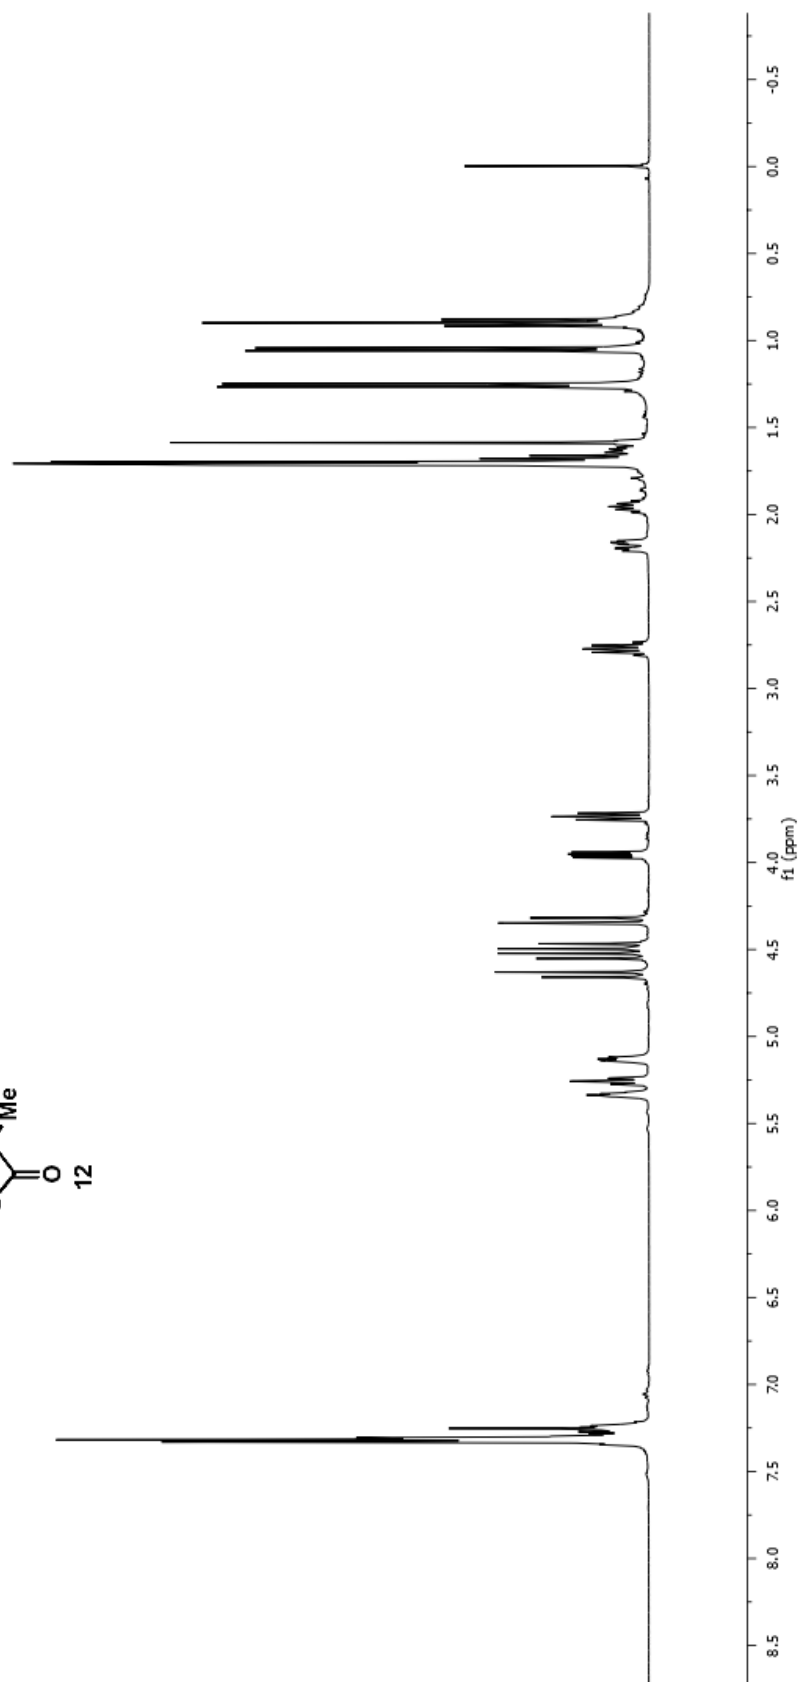

<sup>13</sup>C NMR (125MHz, CDCl<sub>3</sub>)

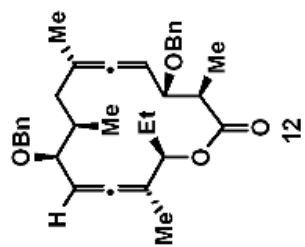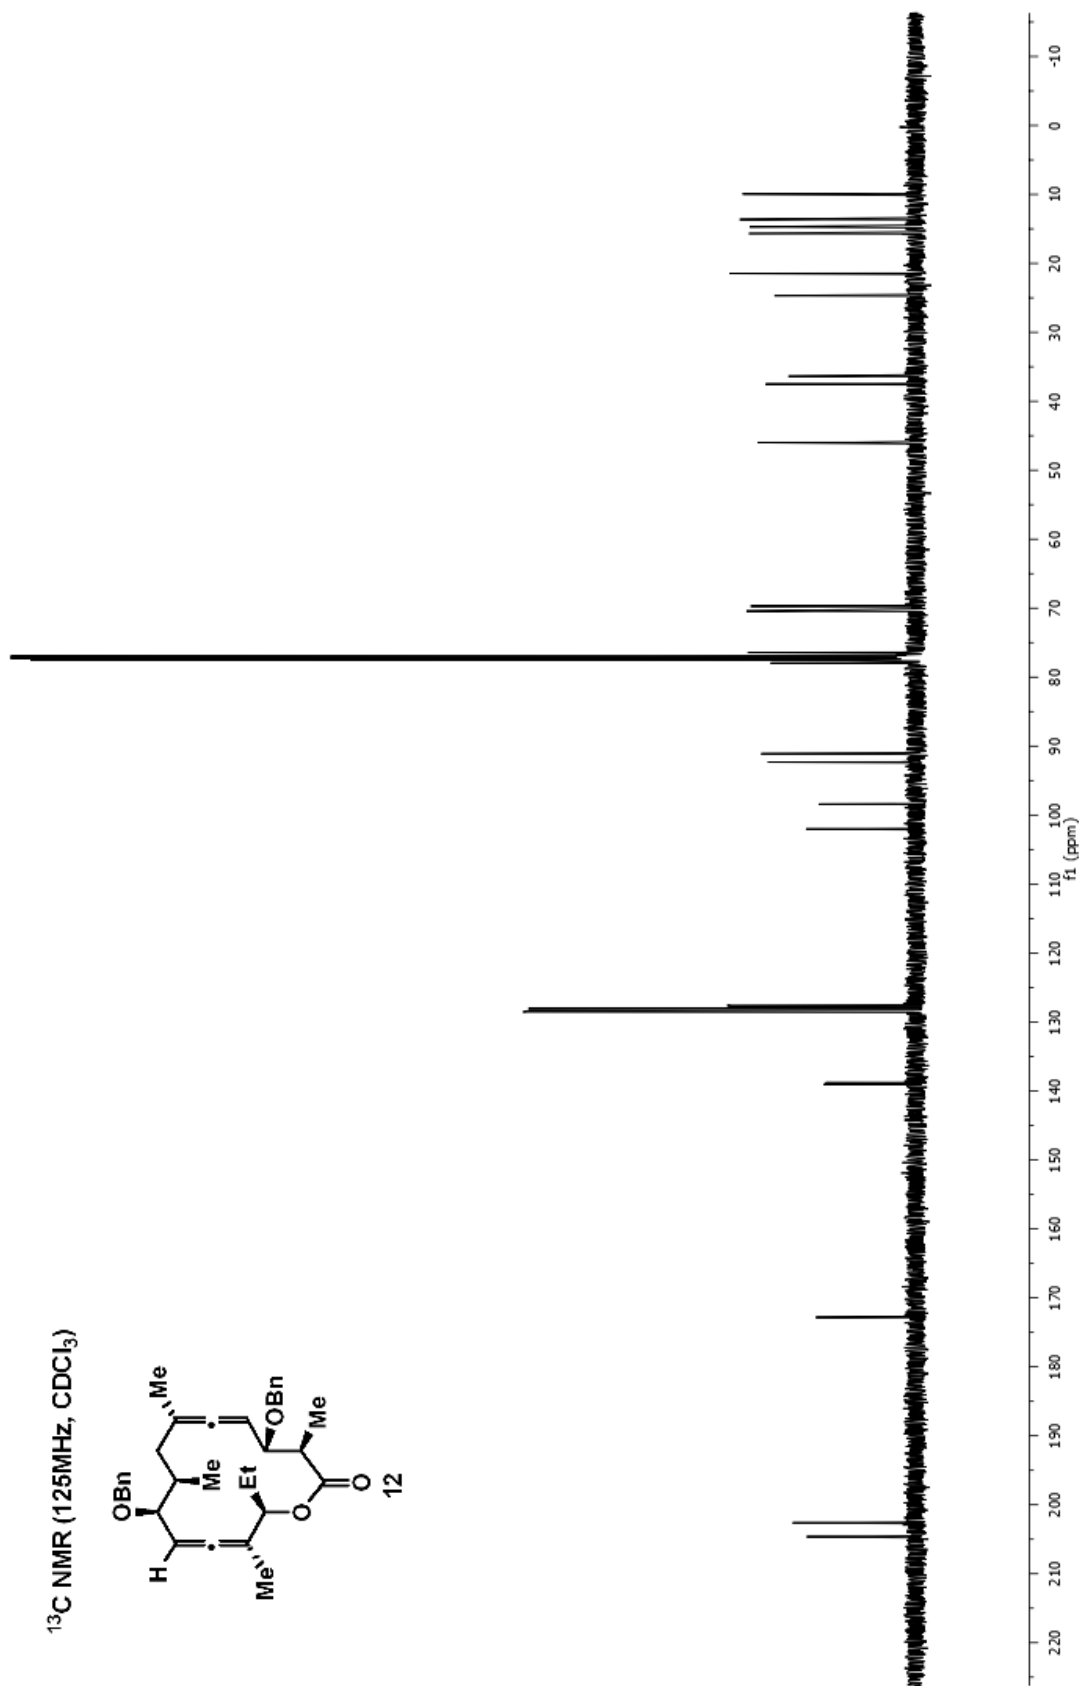



gCOSY

gCOSY, NOSEY, and HETCOR of compound 12

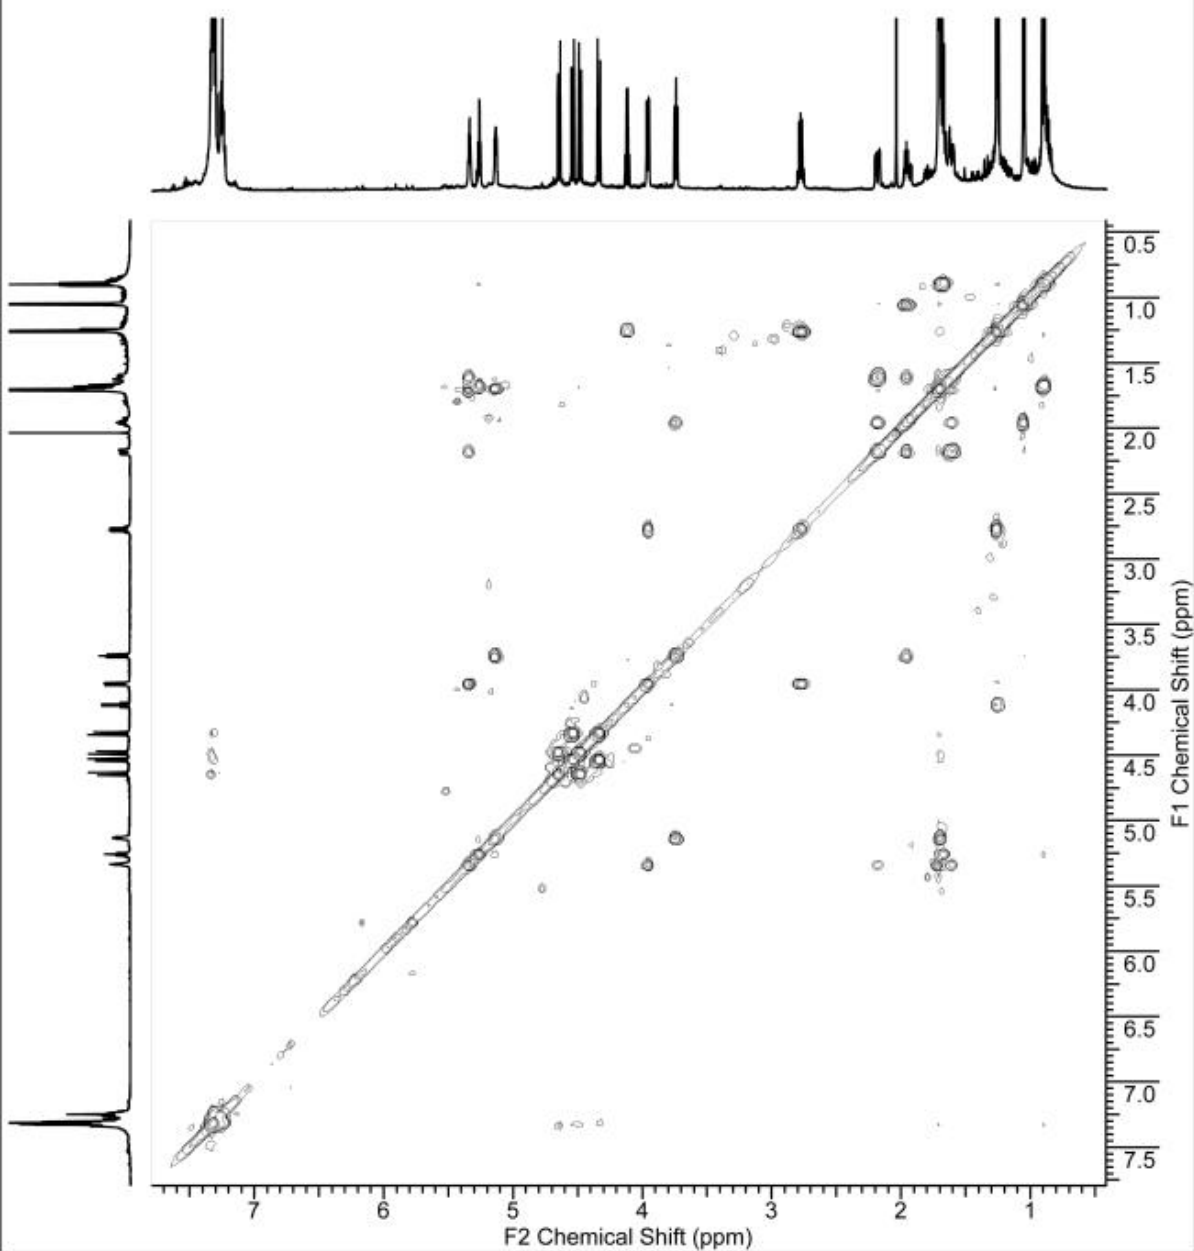

NOESY

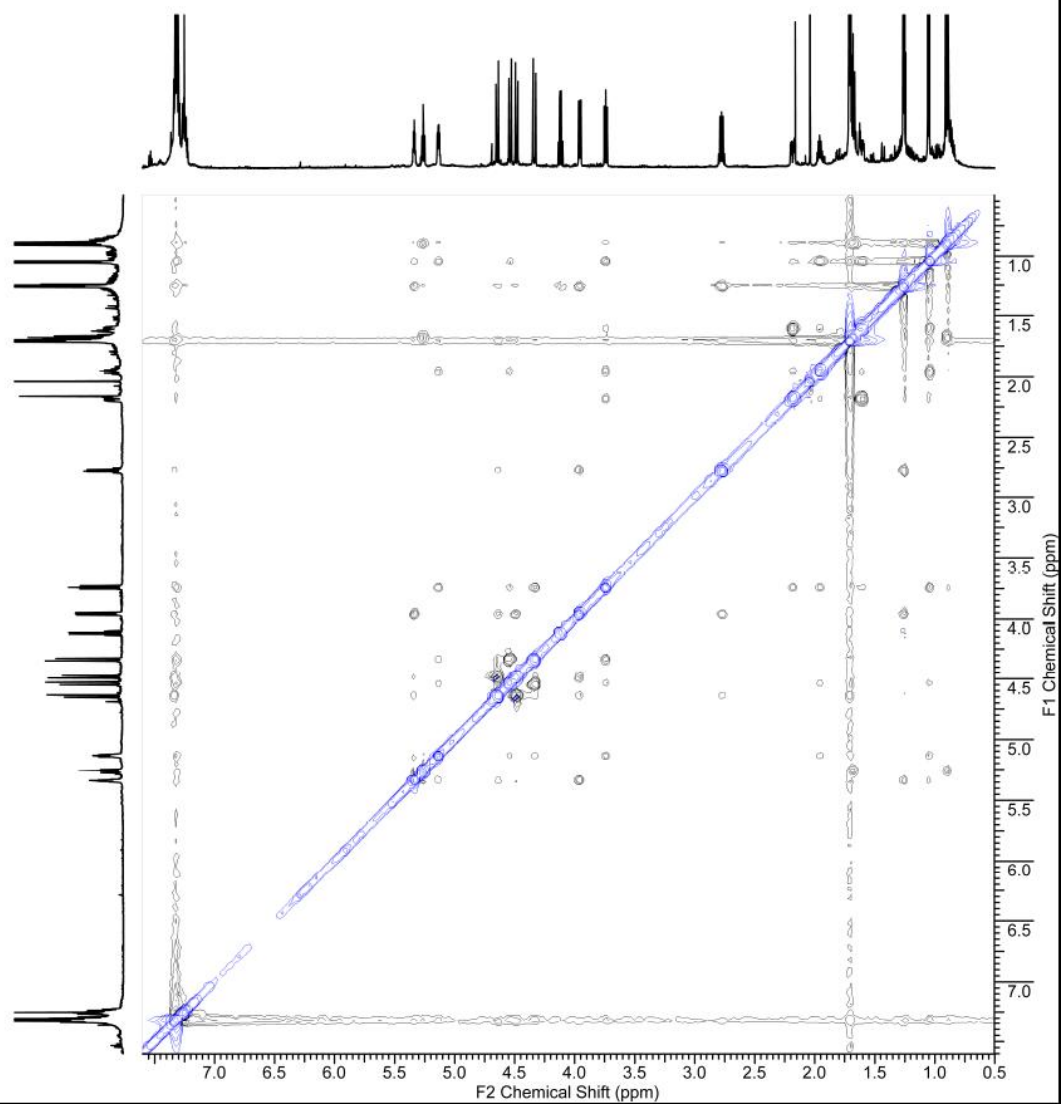

# HETCOR

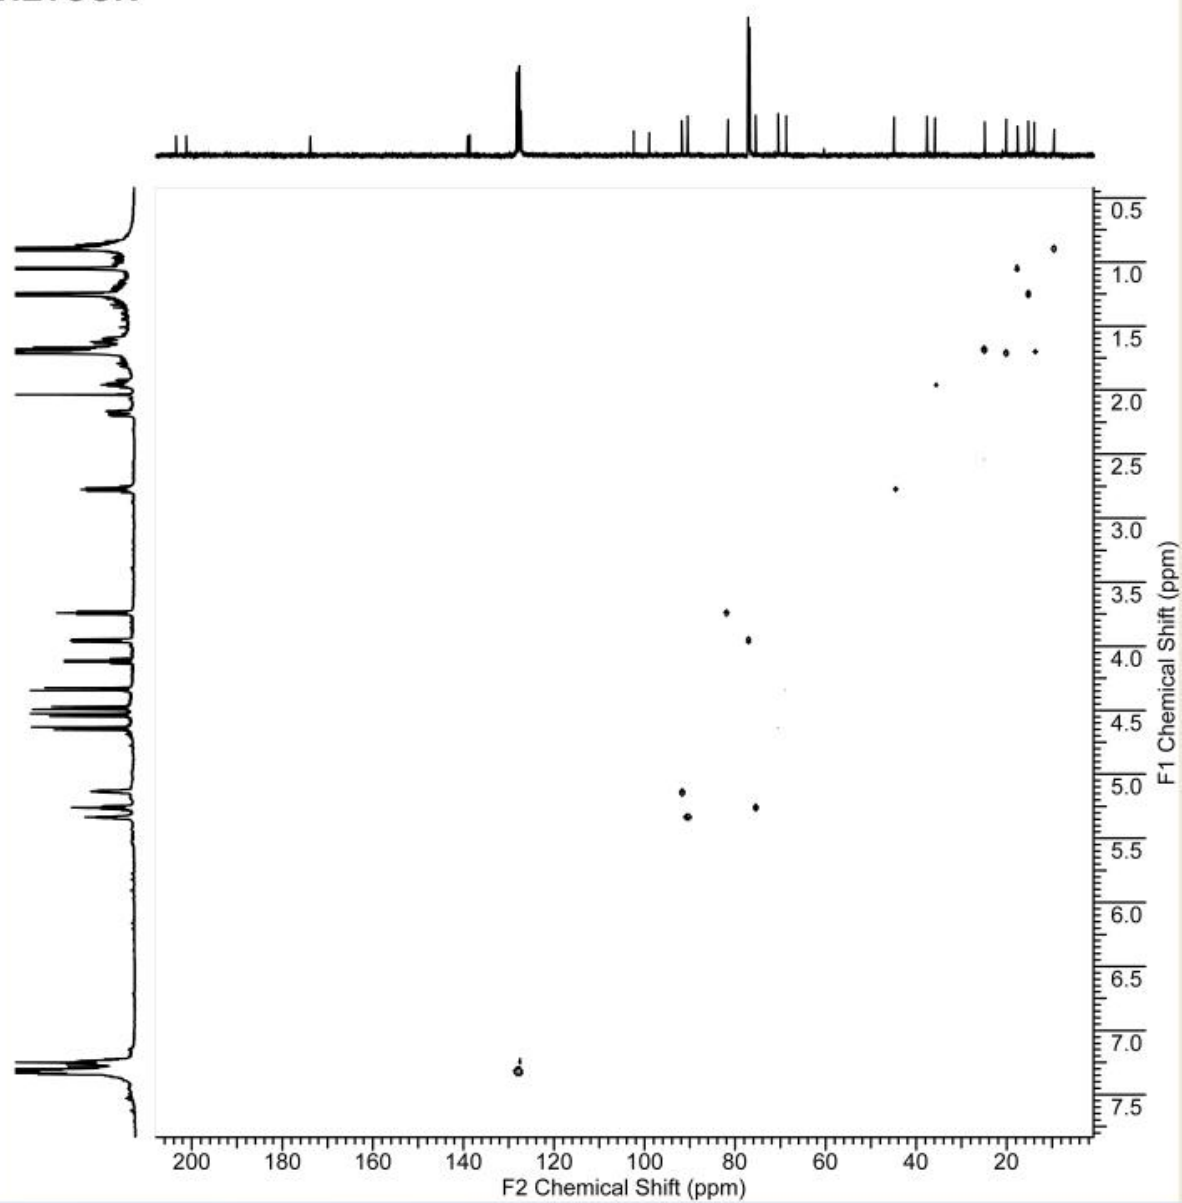

<sup>1</sup>H NMR (500MHz, CDCl<sub>3</sub>)

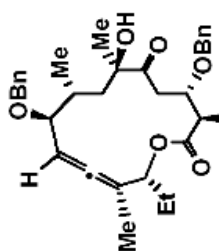

13

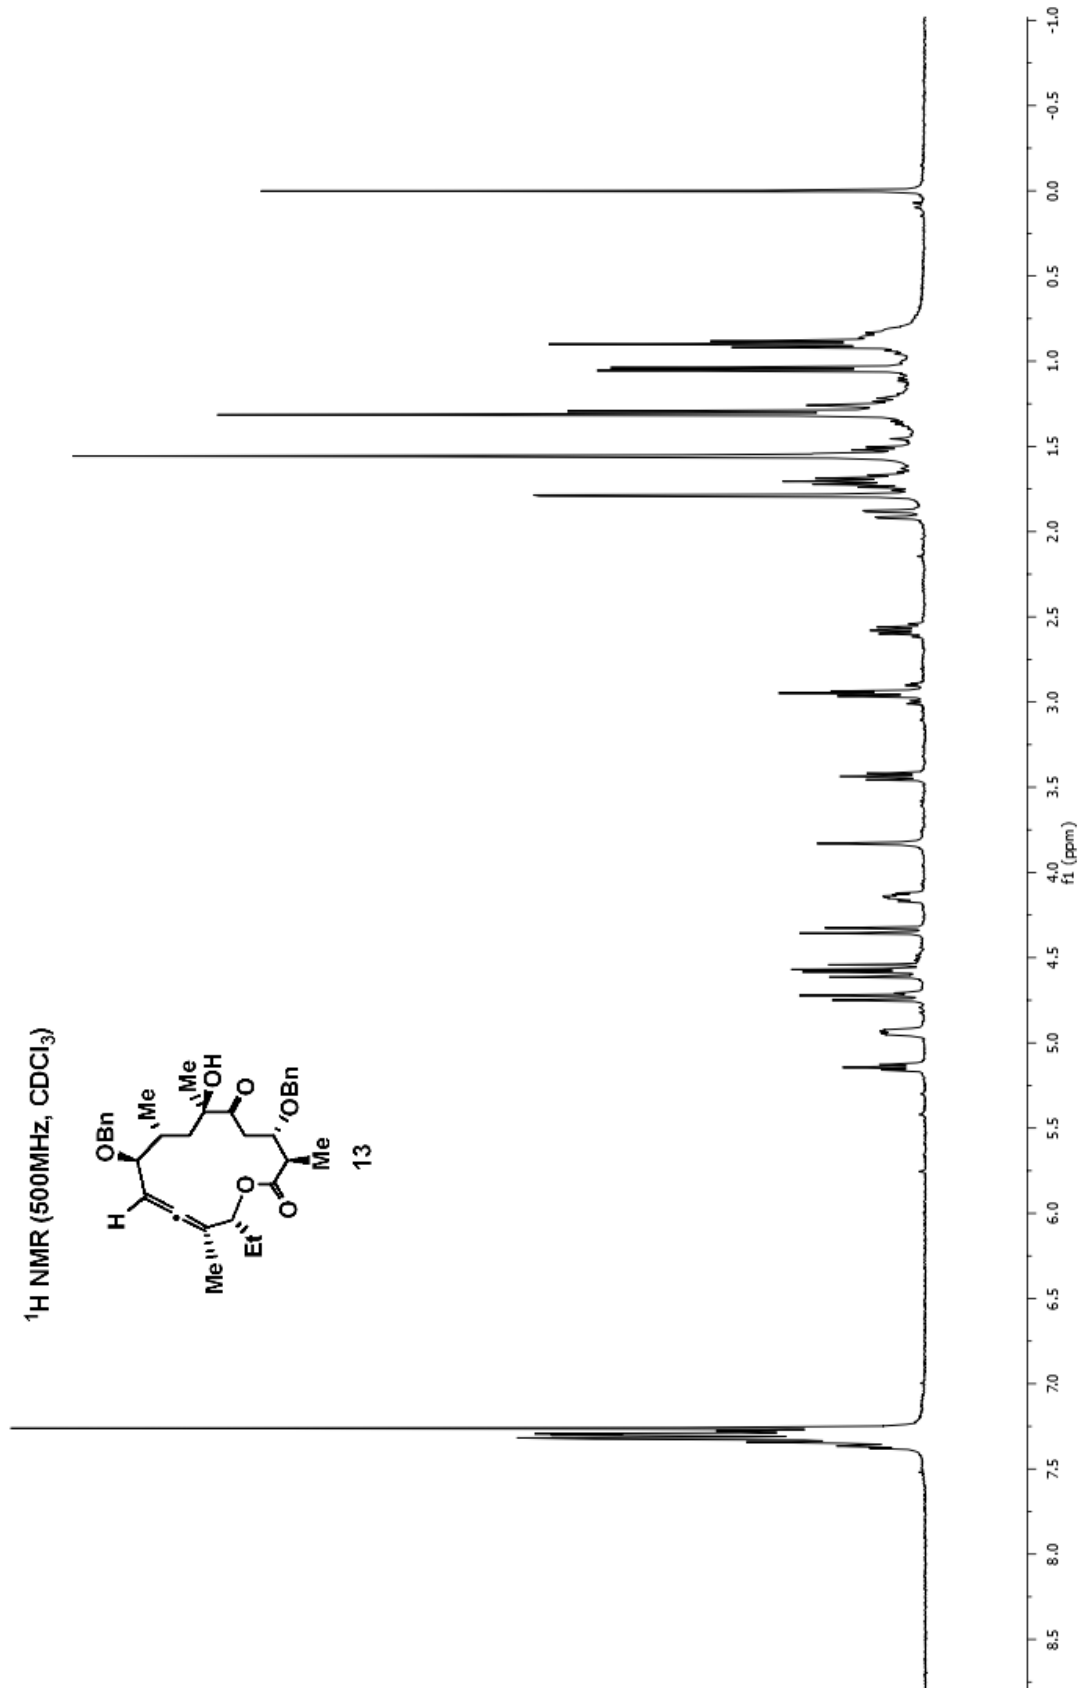

$^{13}\text{C}$  NMR (125MHz,  $\text{CDCl}_3$ )

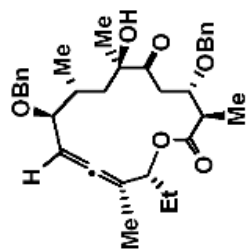

13

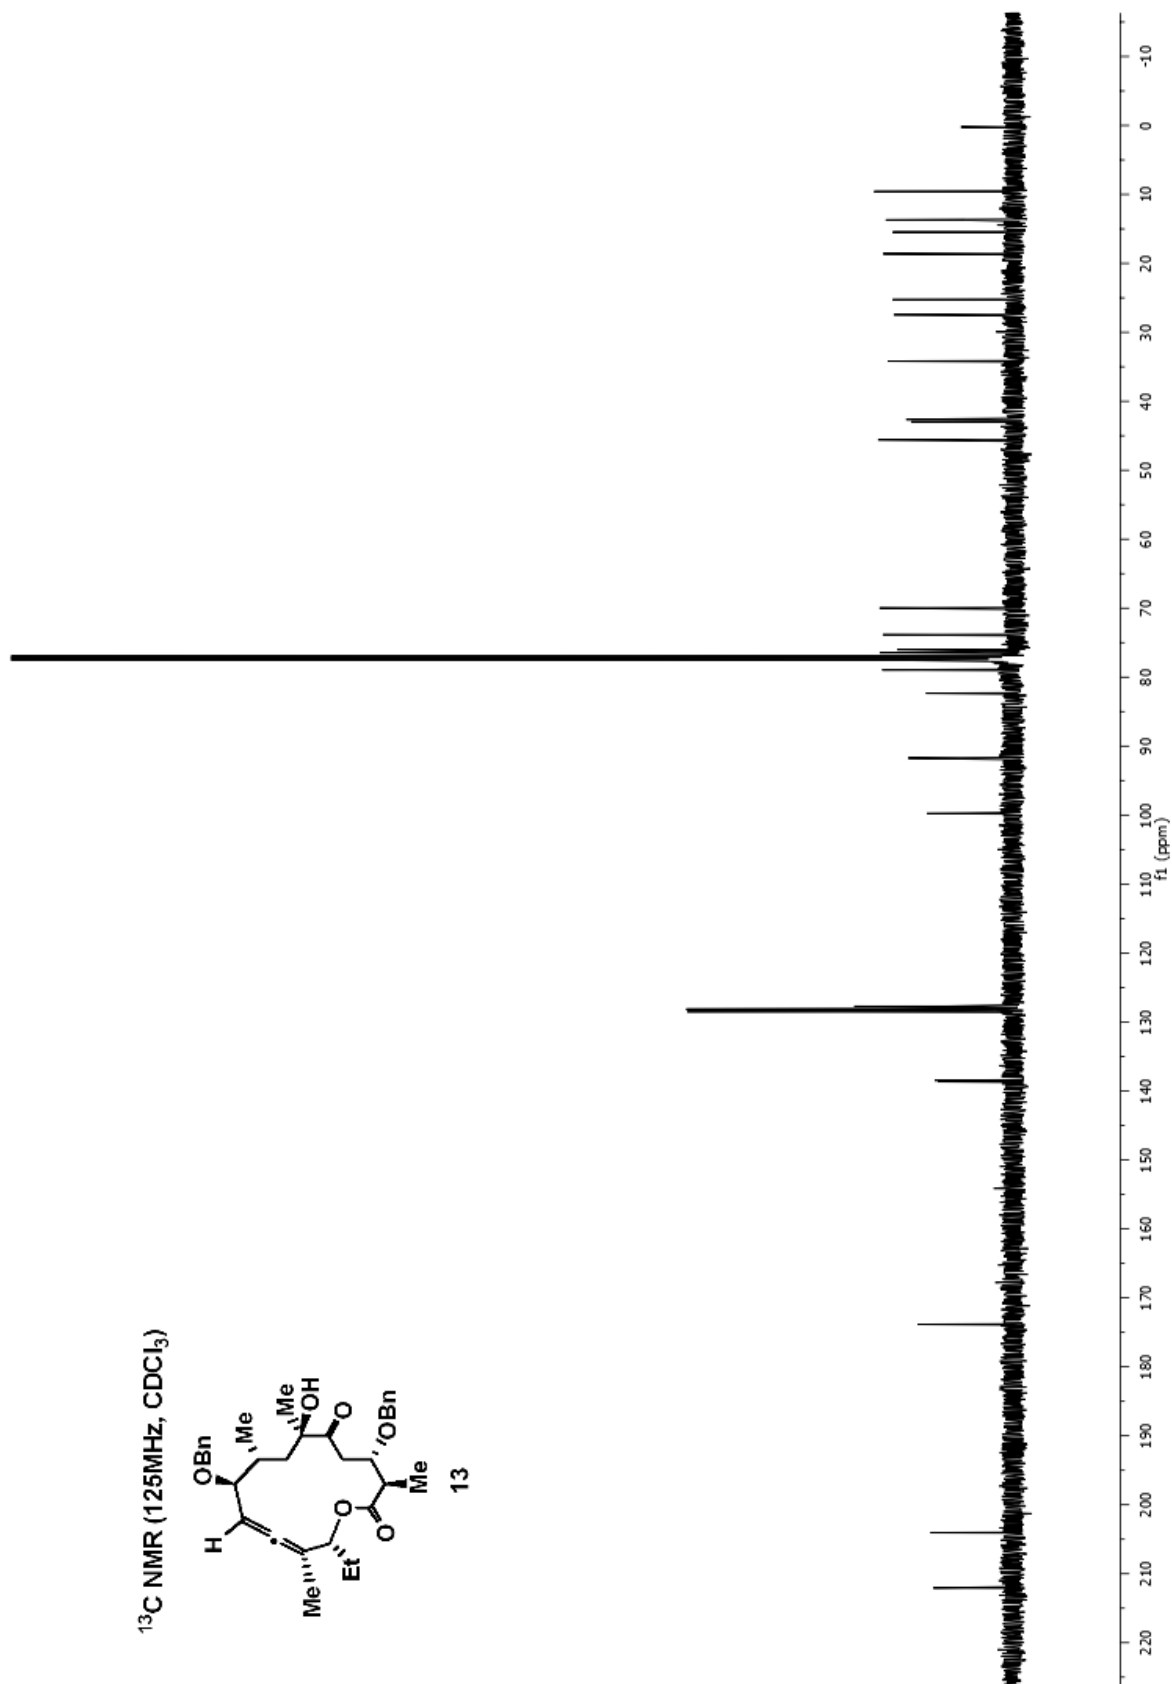

gCOSY, DPGSENOE, gHMBC and HETCOR of compound 13

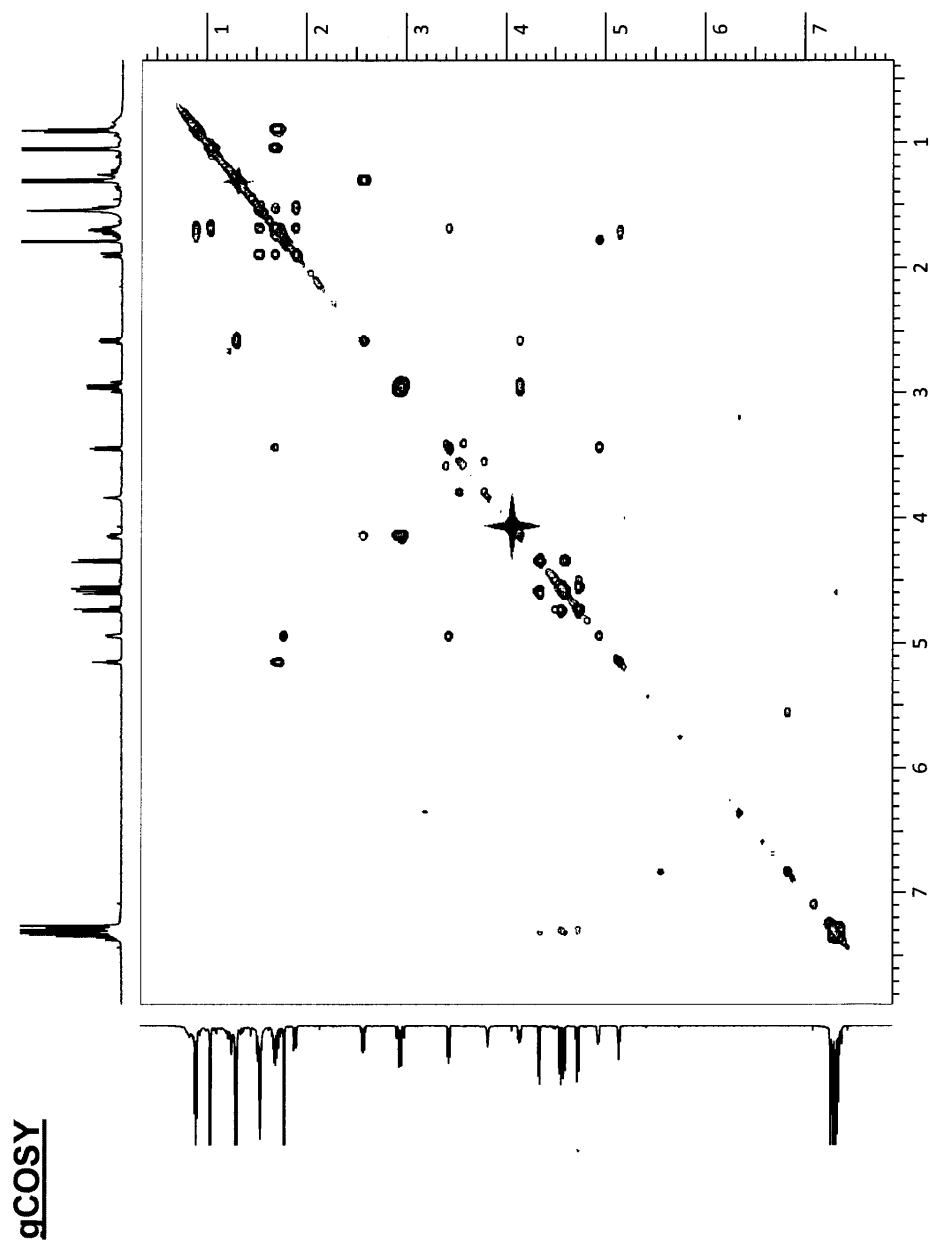

**DPFGSENOE**  
spectrum

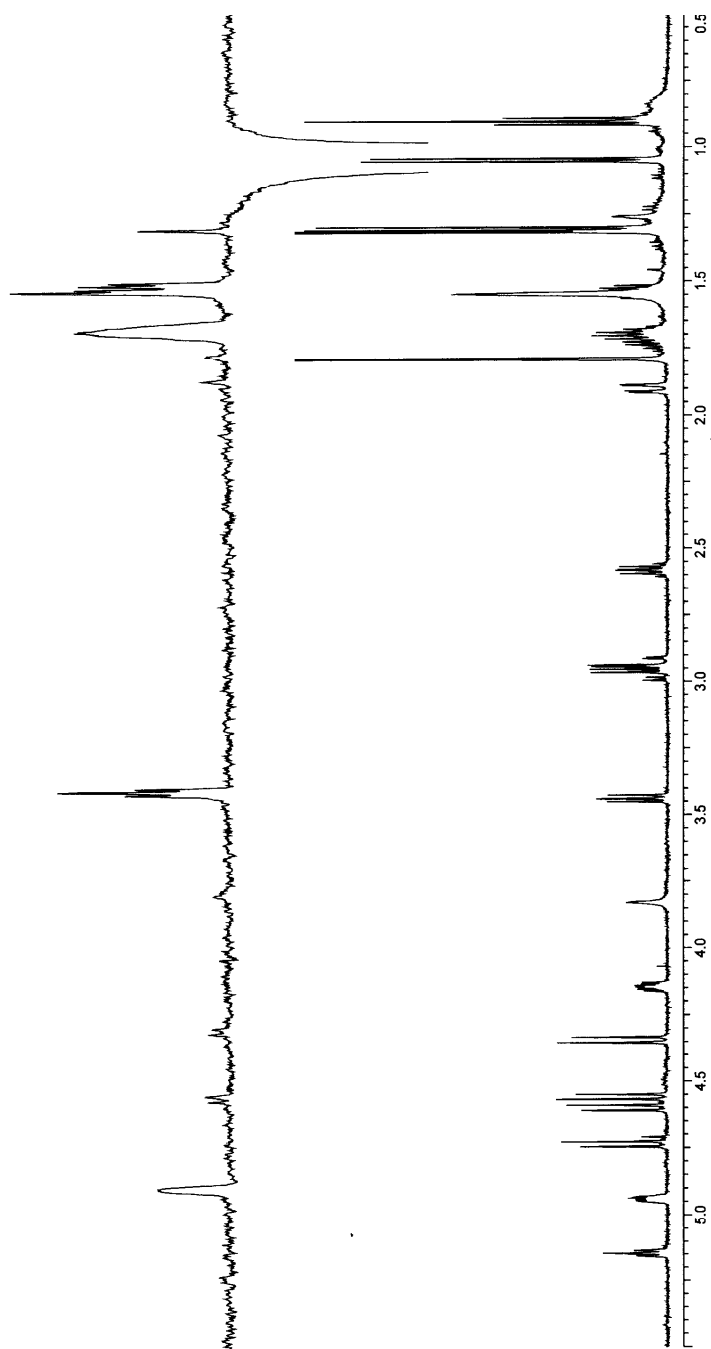

**DPFGSENOE**  
spectrum

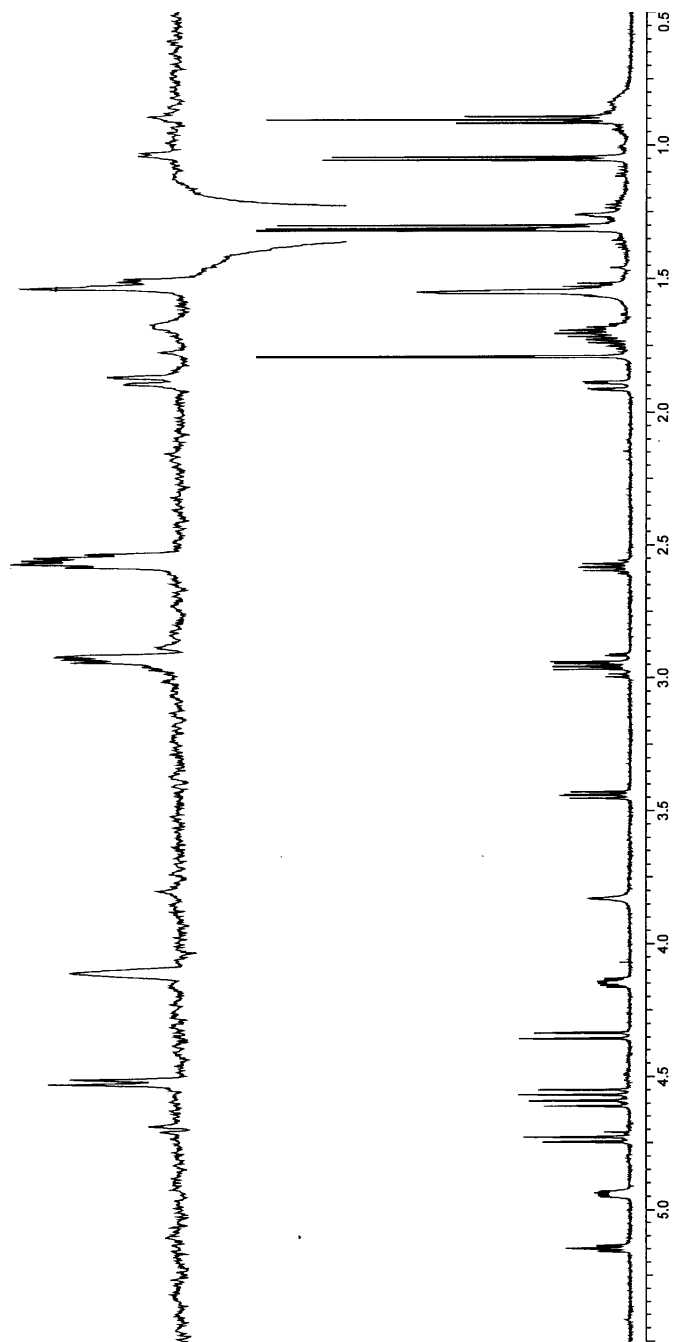



**DPFGSENOE**  
spectra

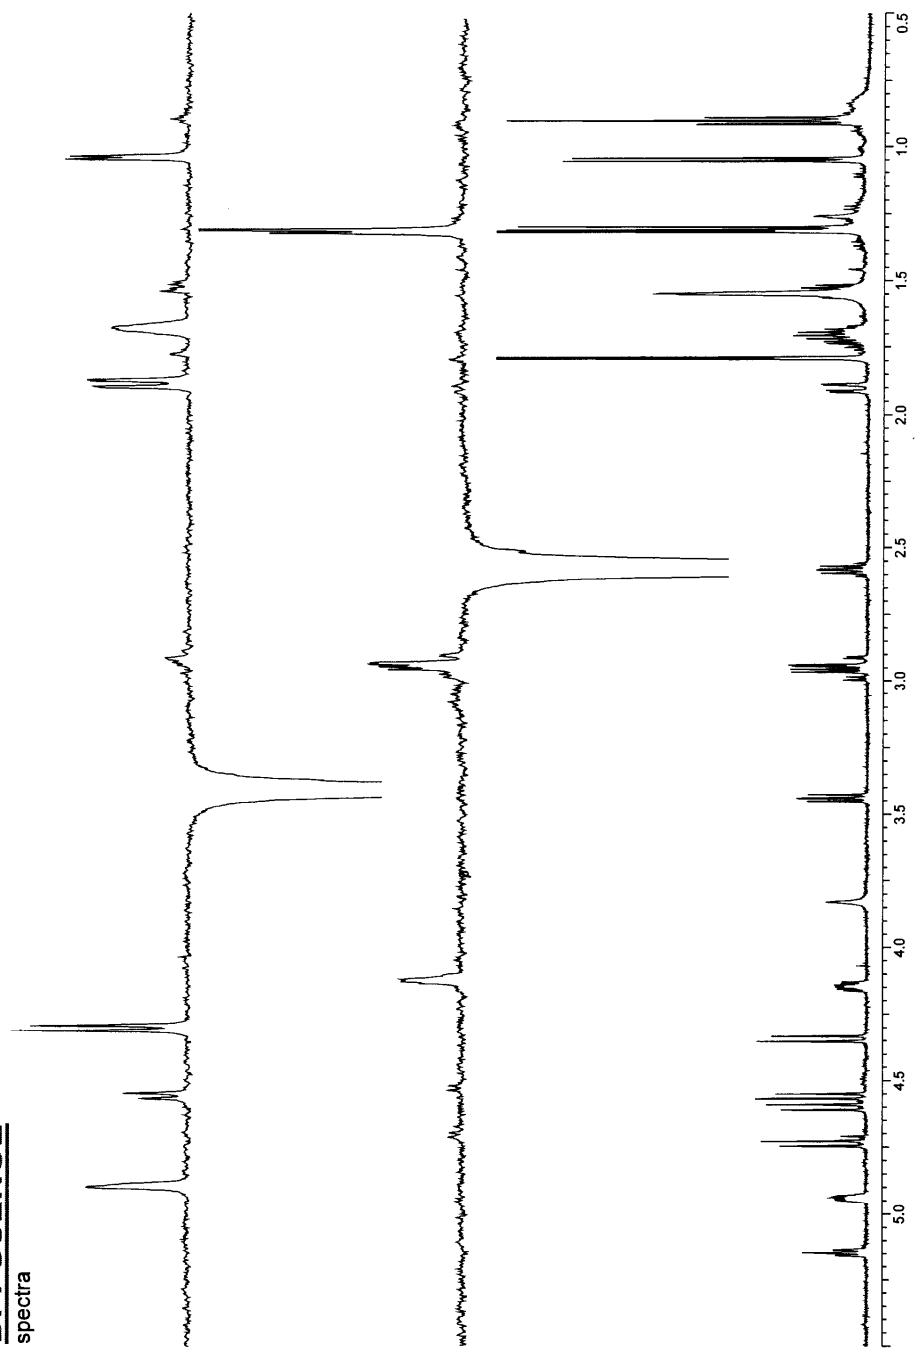

**DPFGSENOE**  
spectrum

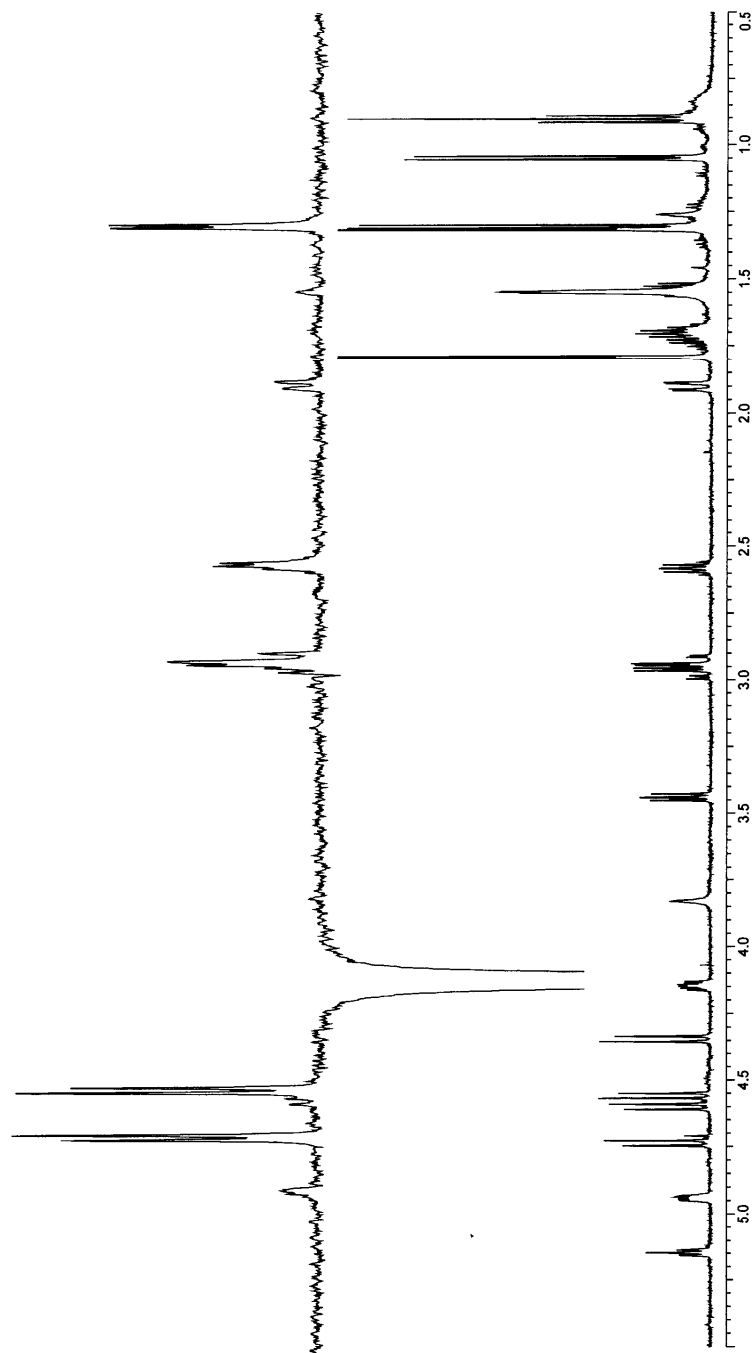

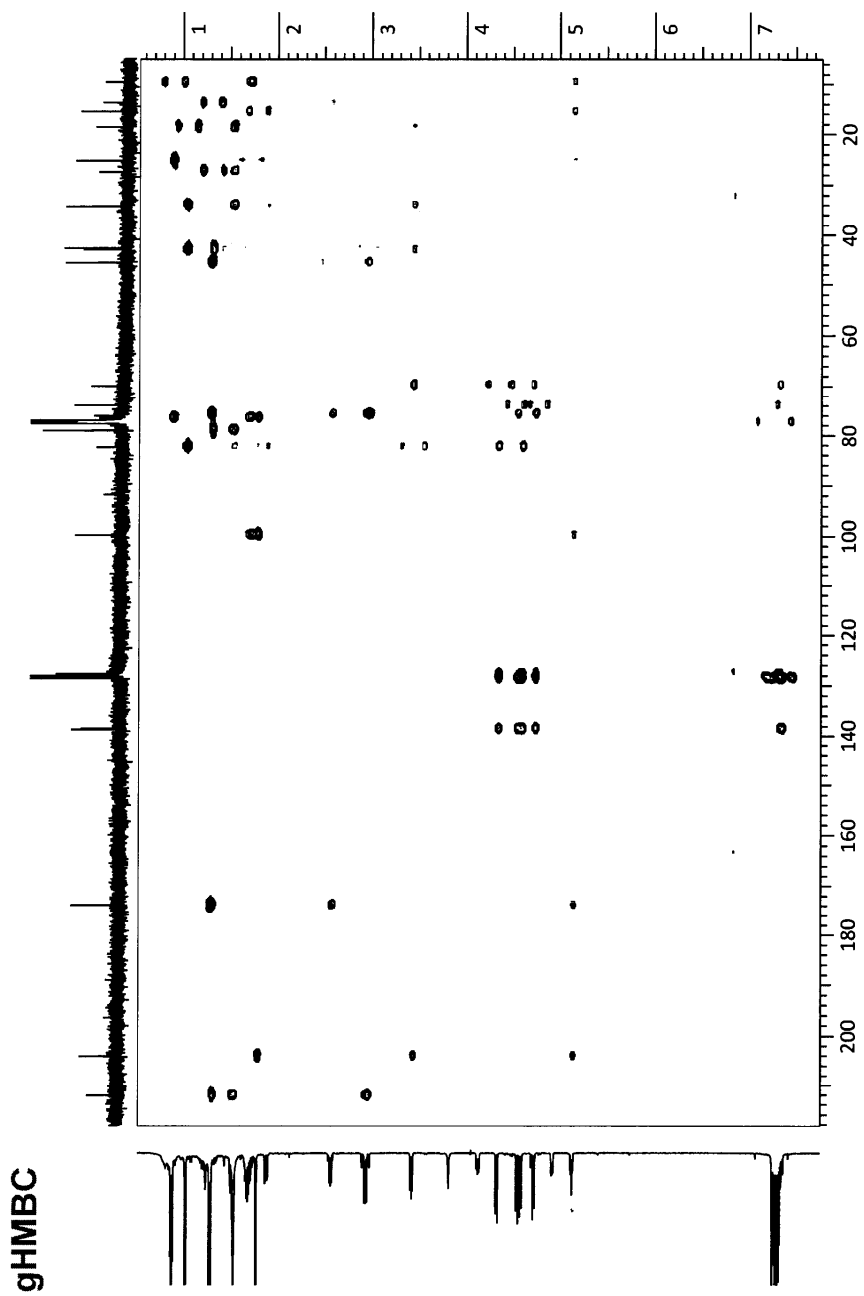

# HETCOR

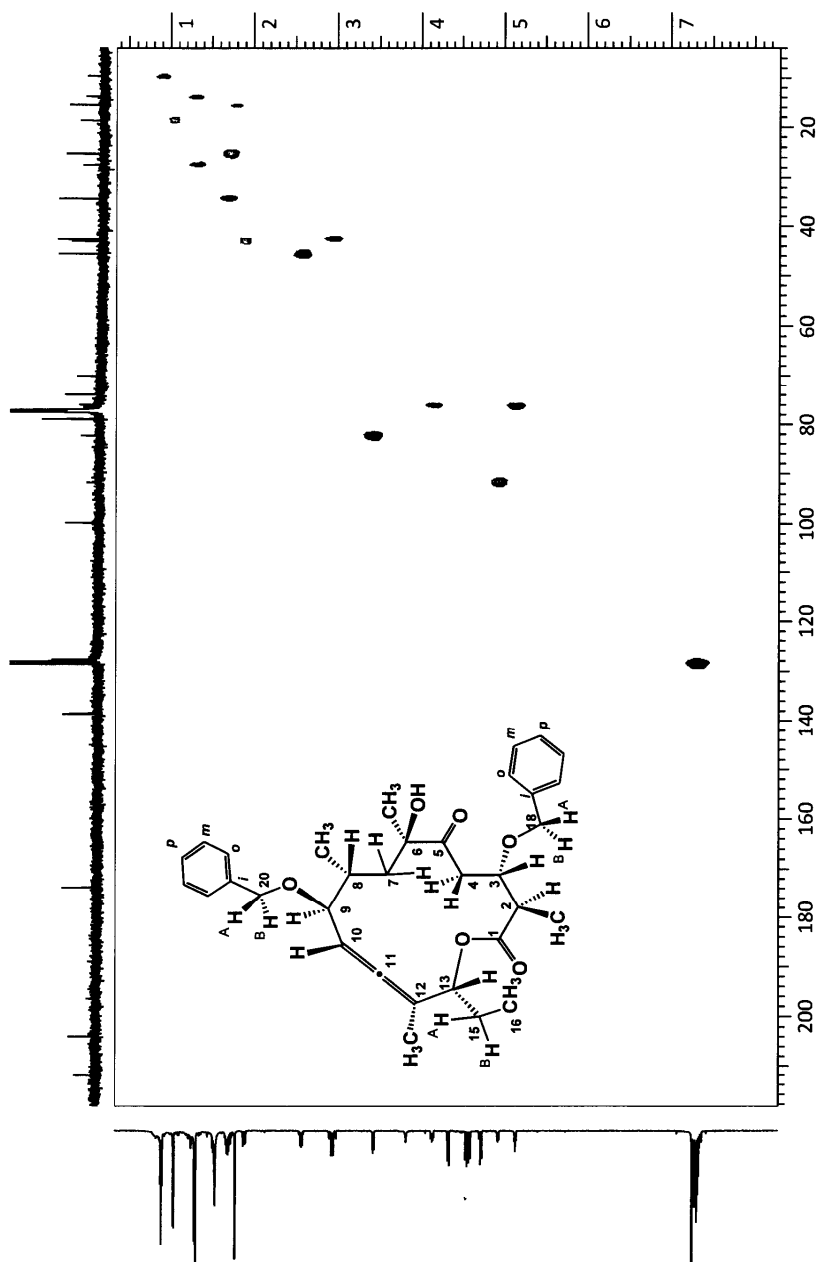

Jun22nd-H1-KL-2-027  
Std proton

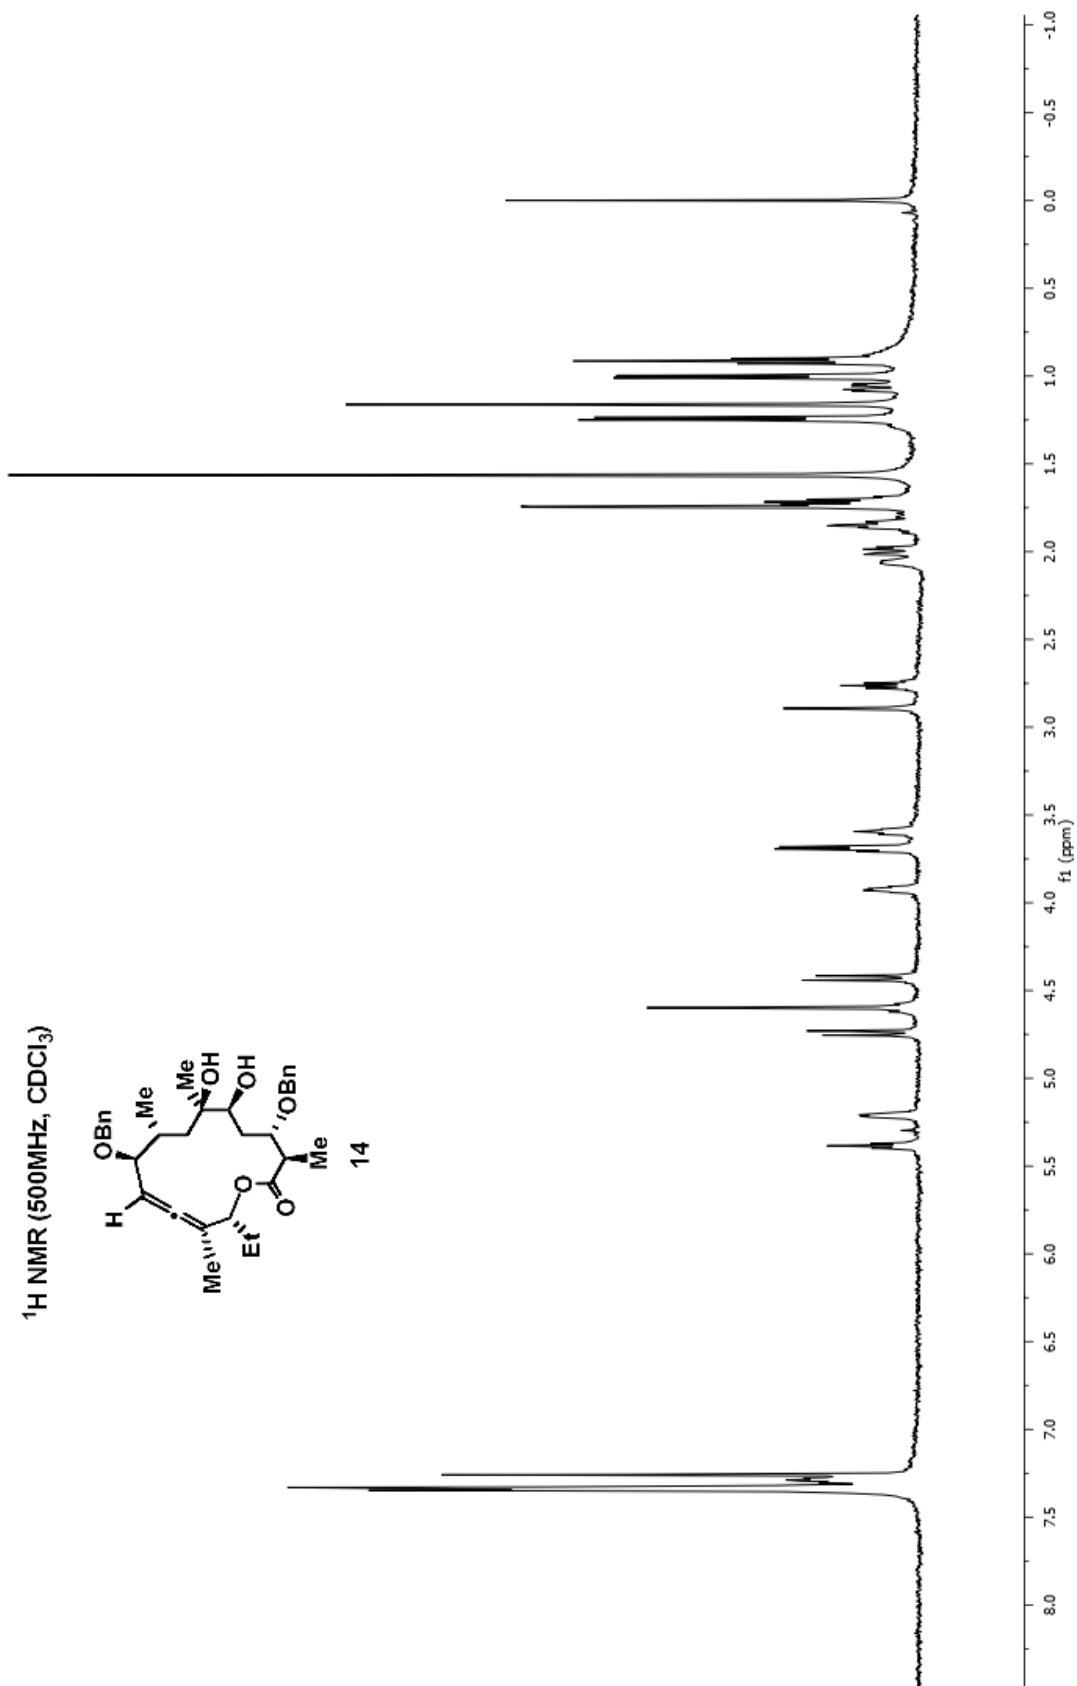

Jun22nd-C13-KL-2-027  
Std proton

$^{13}\text{C}$  NMR (125MHz,  $\text{CDCl}_3$ )

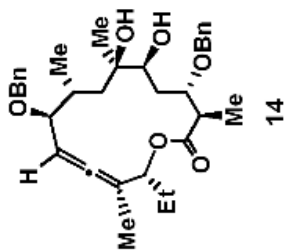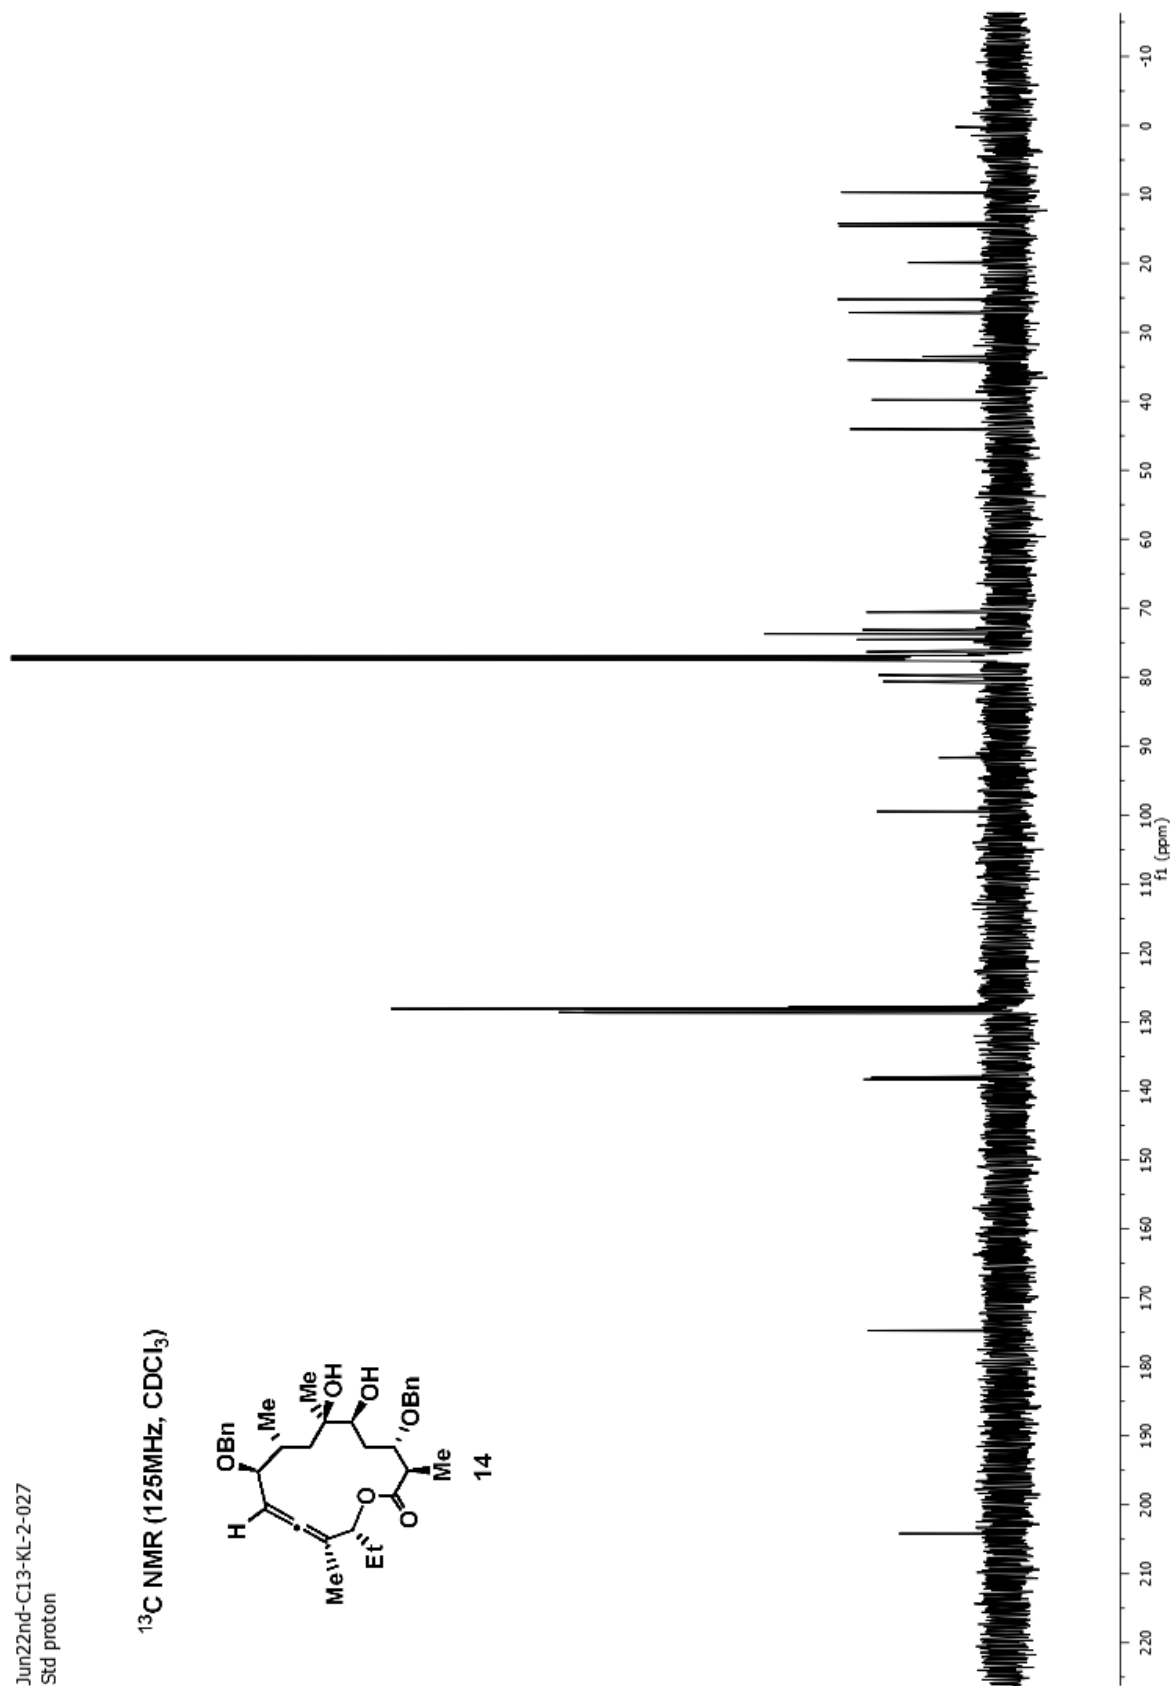

# 1D TOCSY spectra

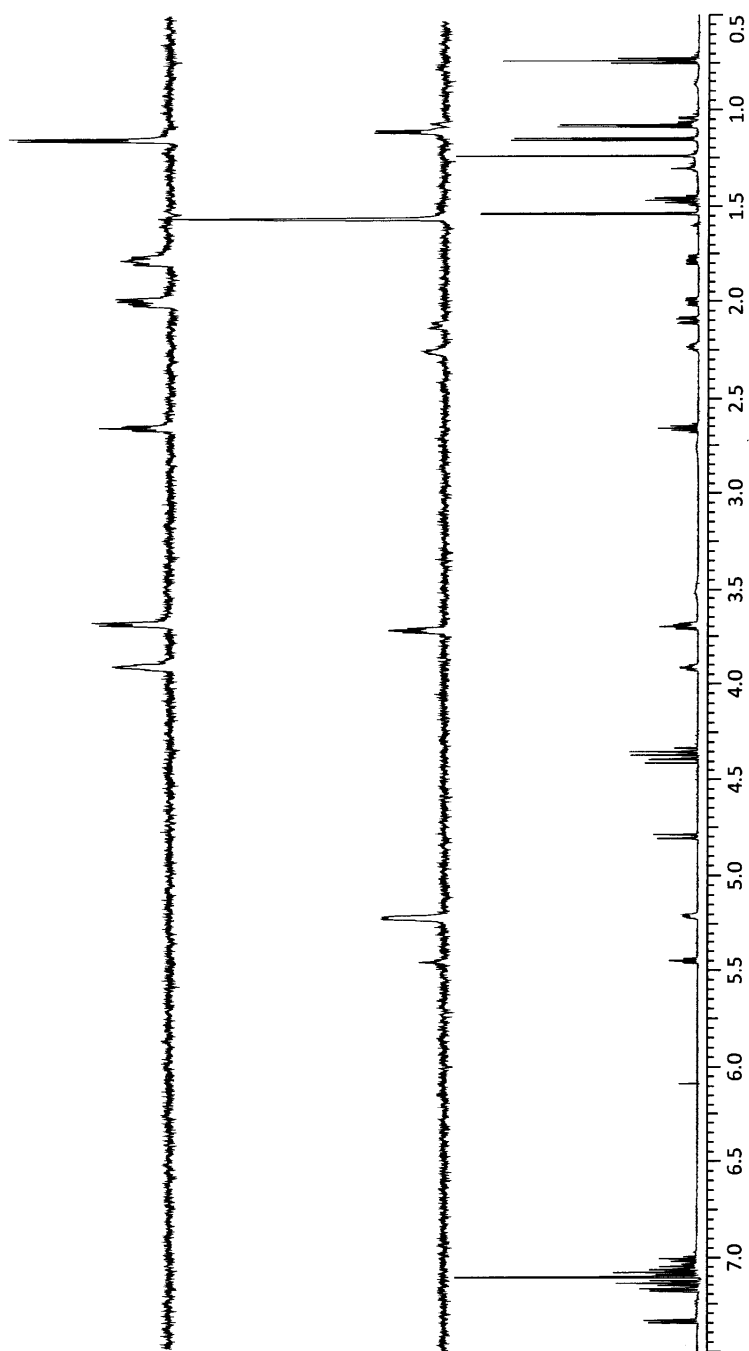

1D TOCSY, NOSEY and gHMBC of compound 14

# NOESY

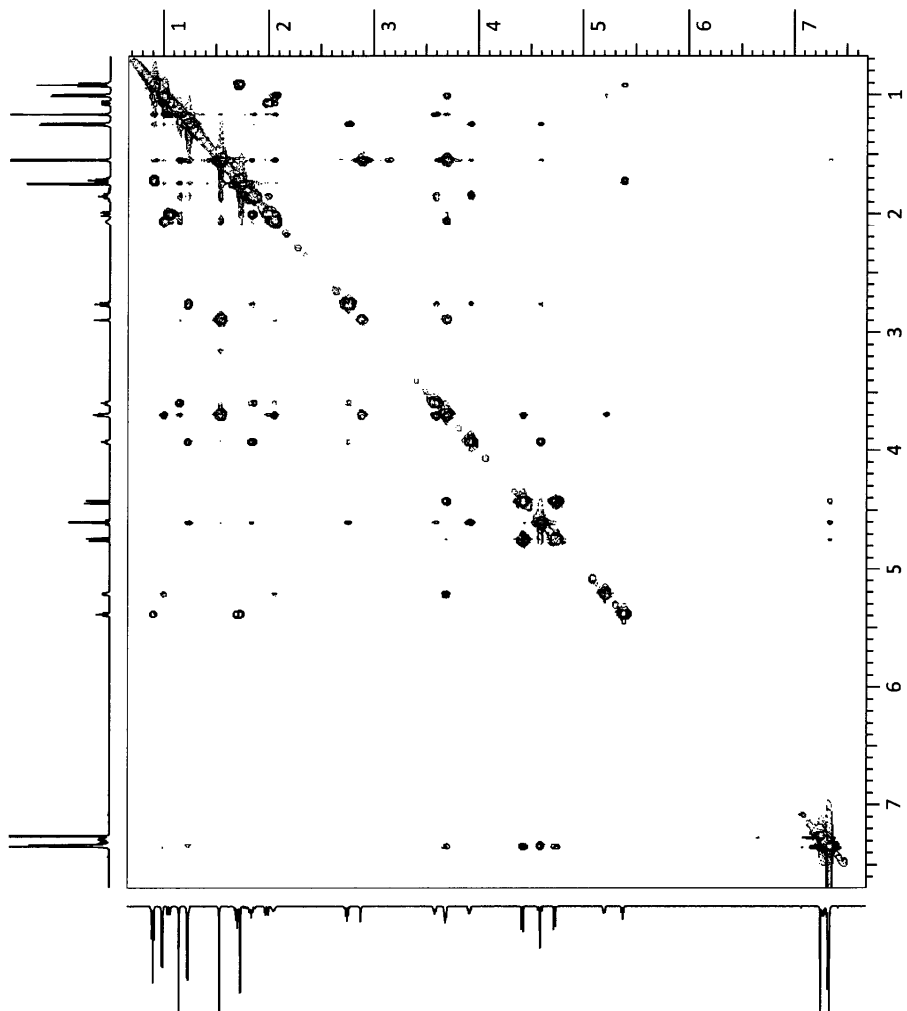



# gHMBC (long-range correlations)

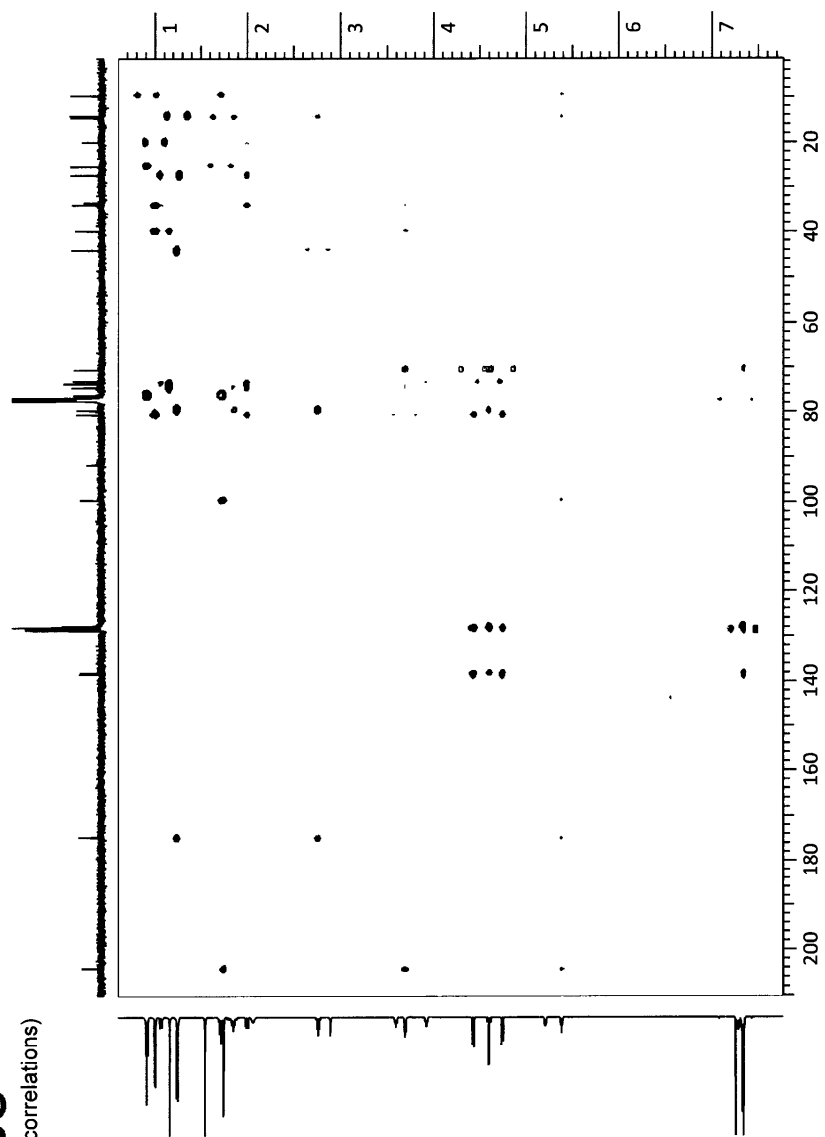

<sup>1</sup>H NMR (500MHz, CDCl<sub>3</sub>)

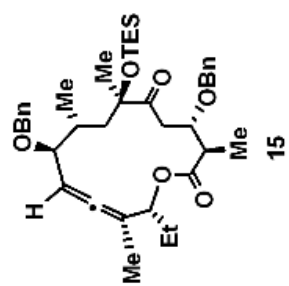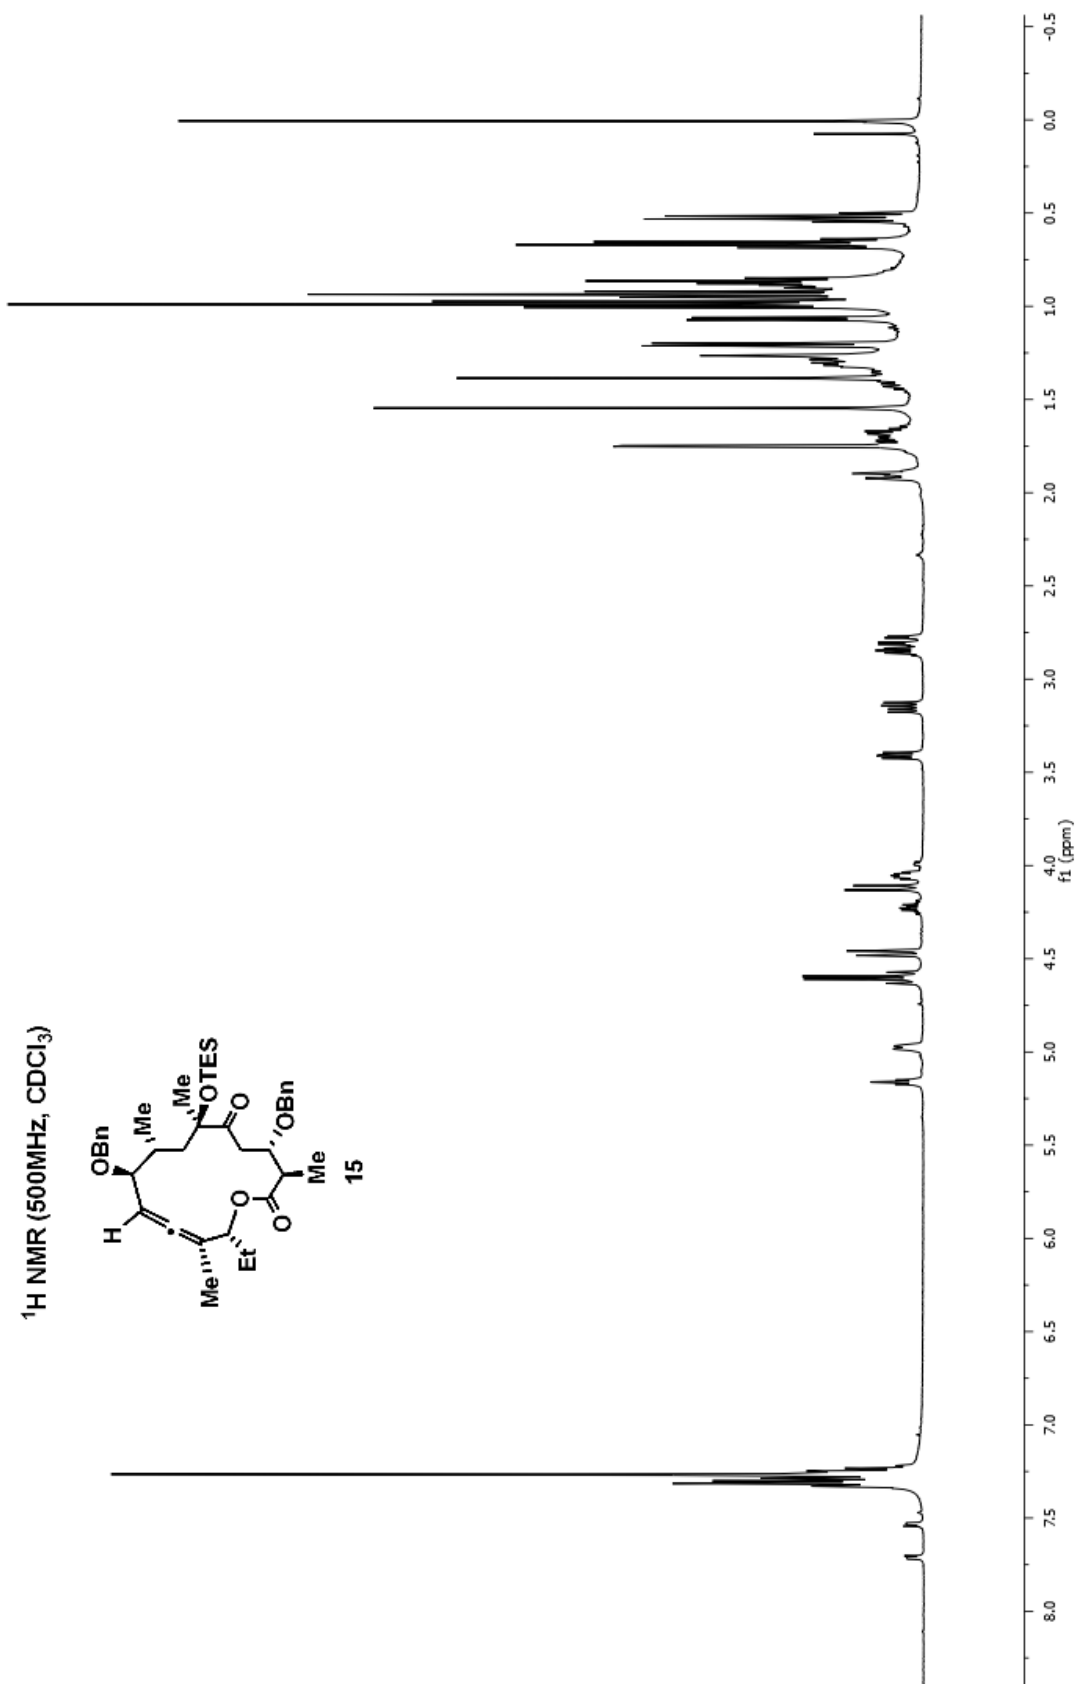

$^{13}\text{C}$  NMR (125MHz,  $\text{CDCl}_3$ )

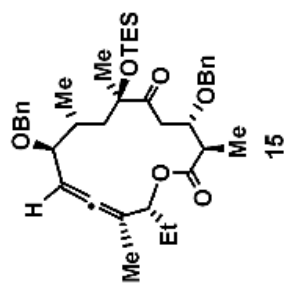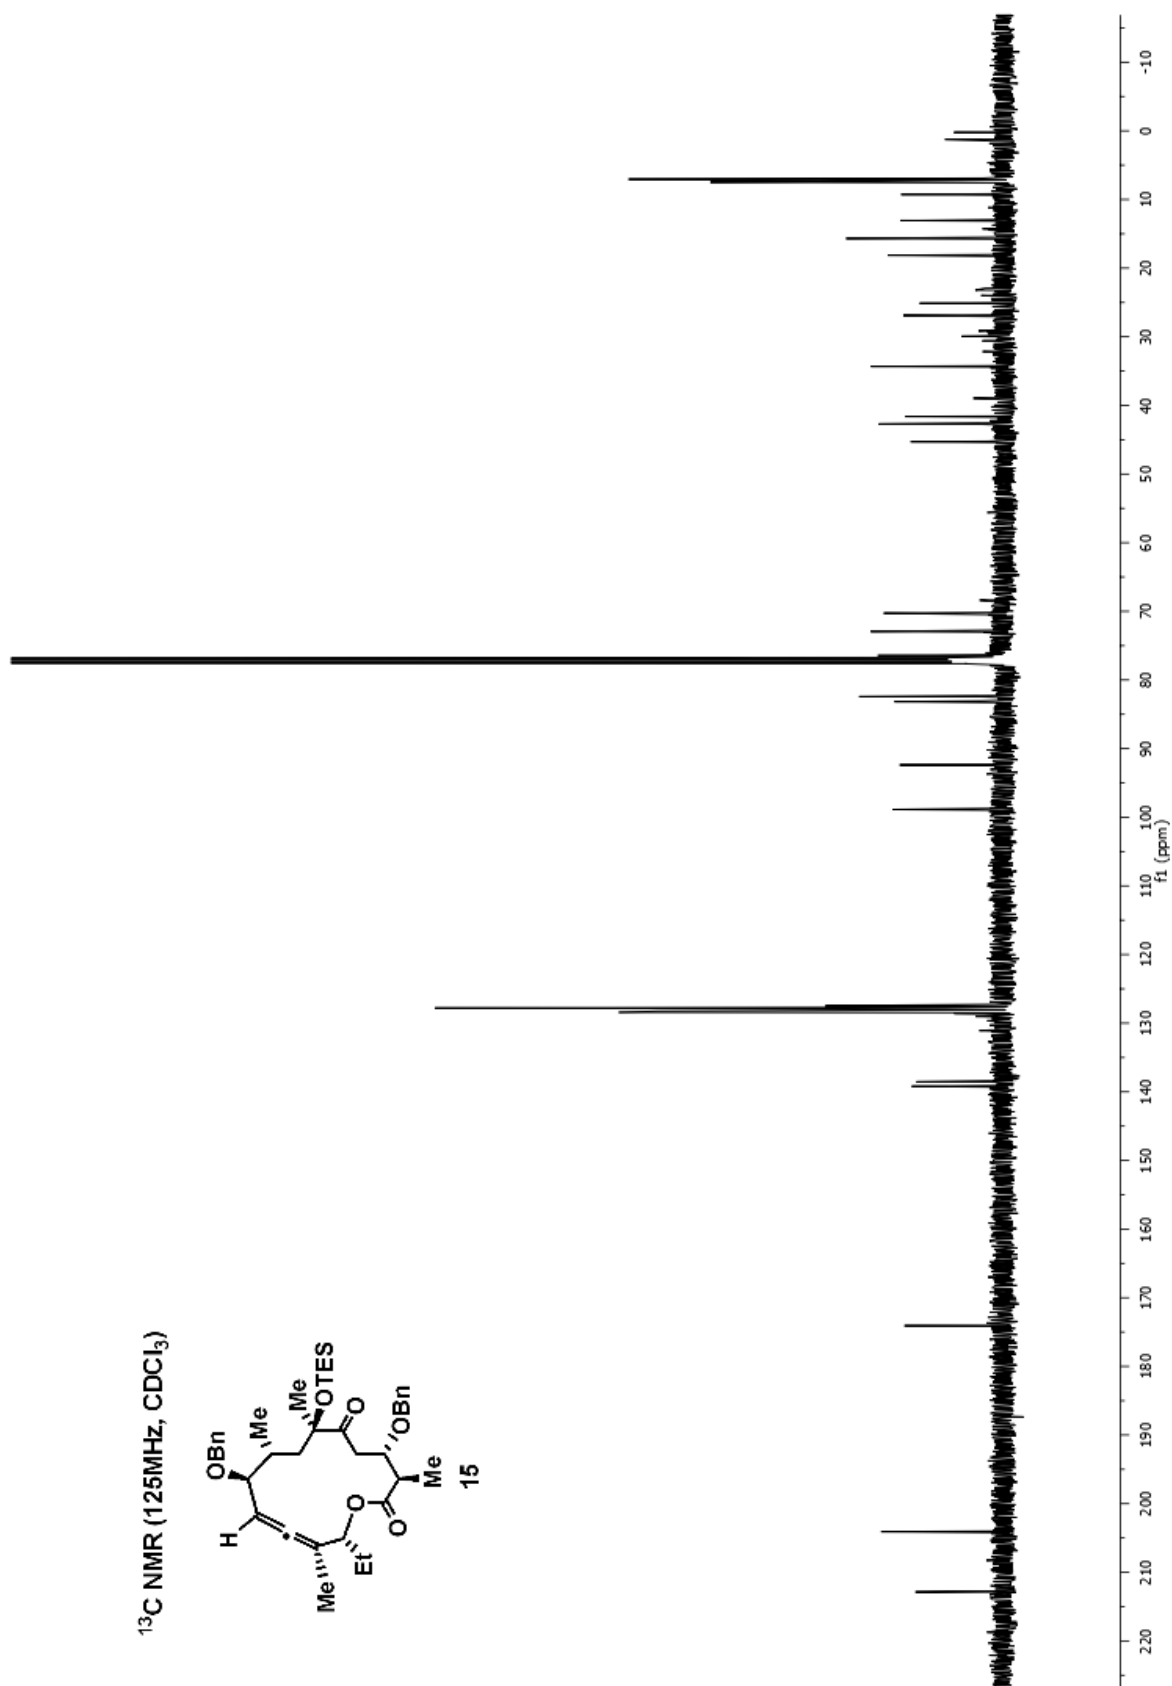

$^1\text{H}$  NMR (500MHz,  $\text{CDCl}_3$ )

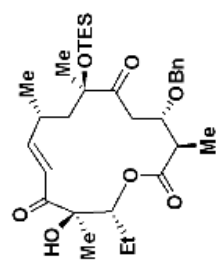

16

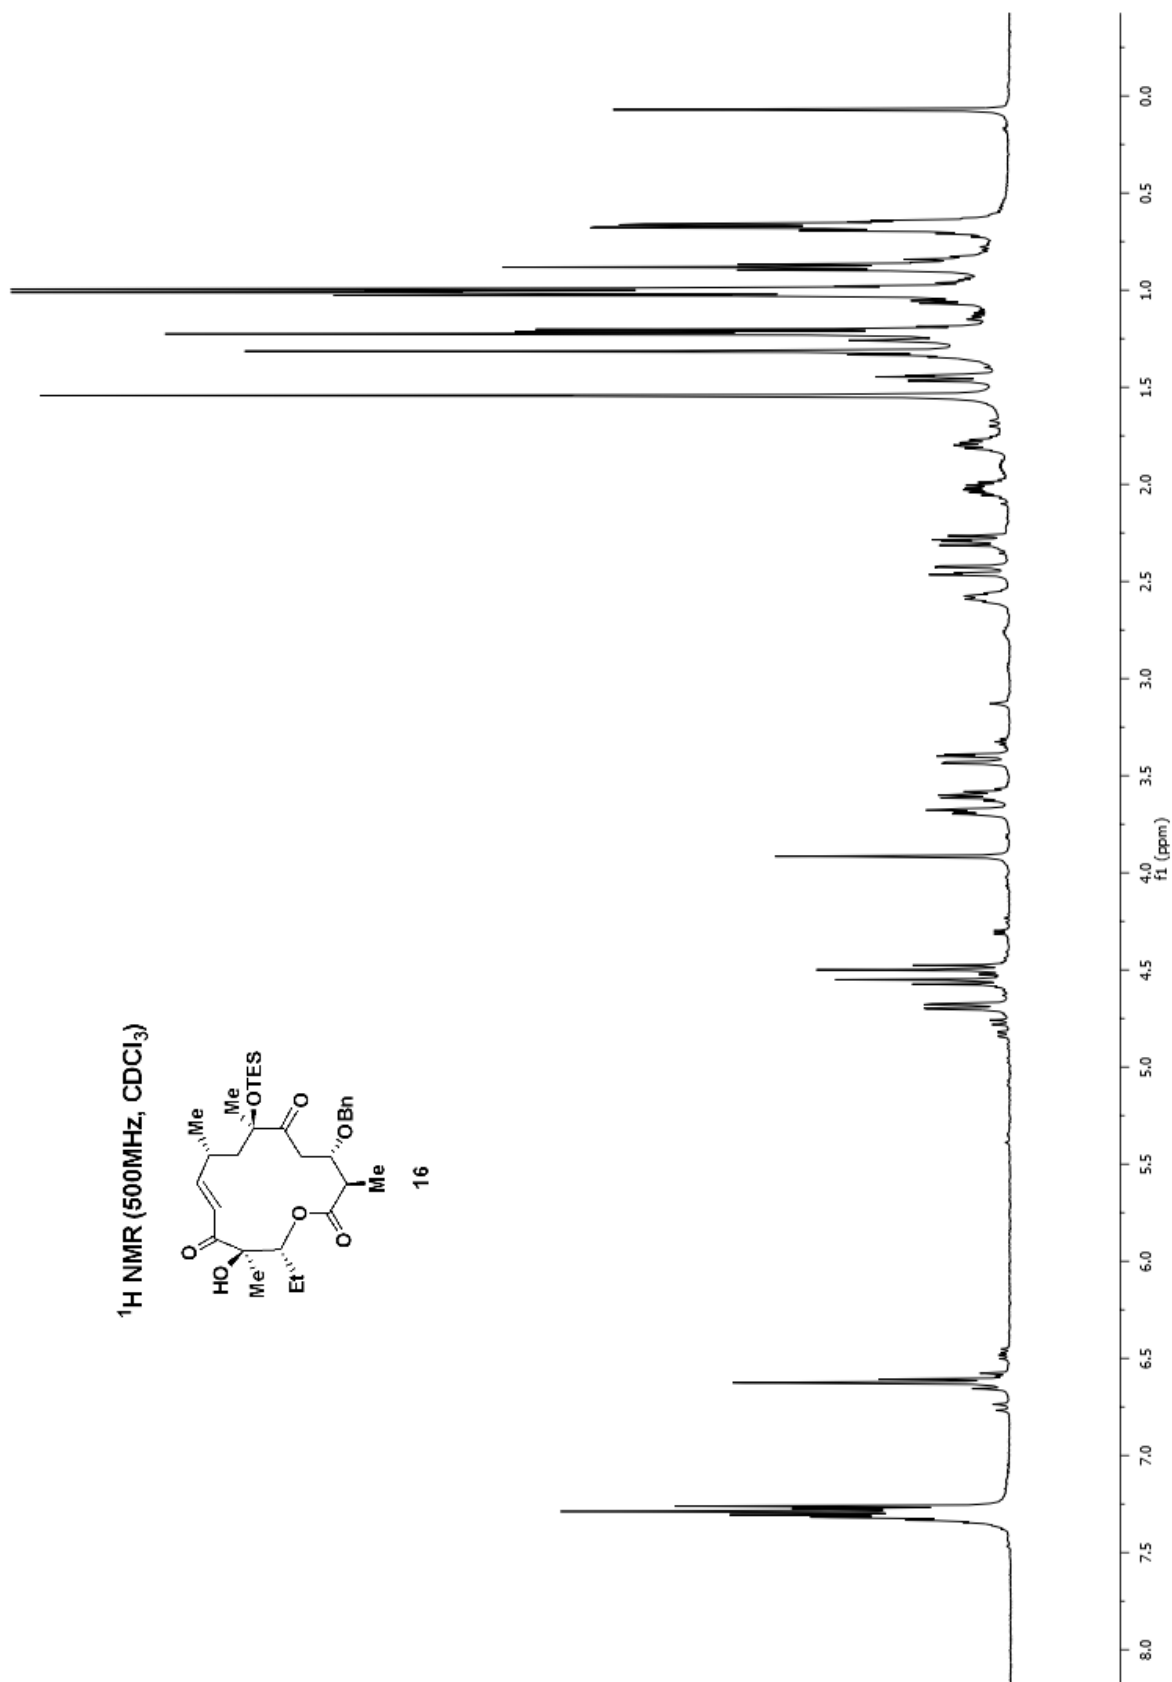

$^{13}\text{C}$  NMR (125MHz,  $\text{CDCl}_3$ )

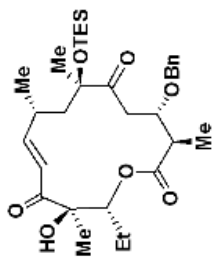

16

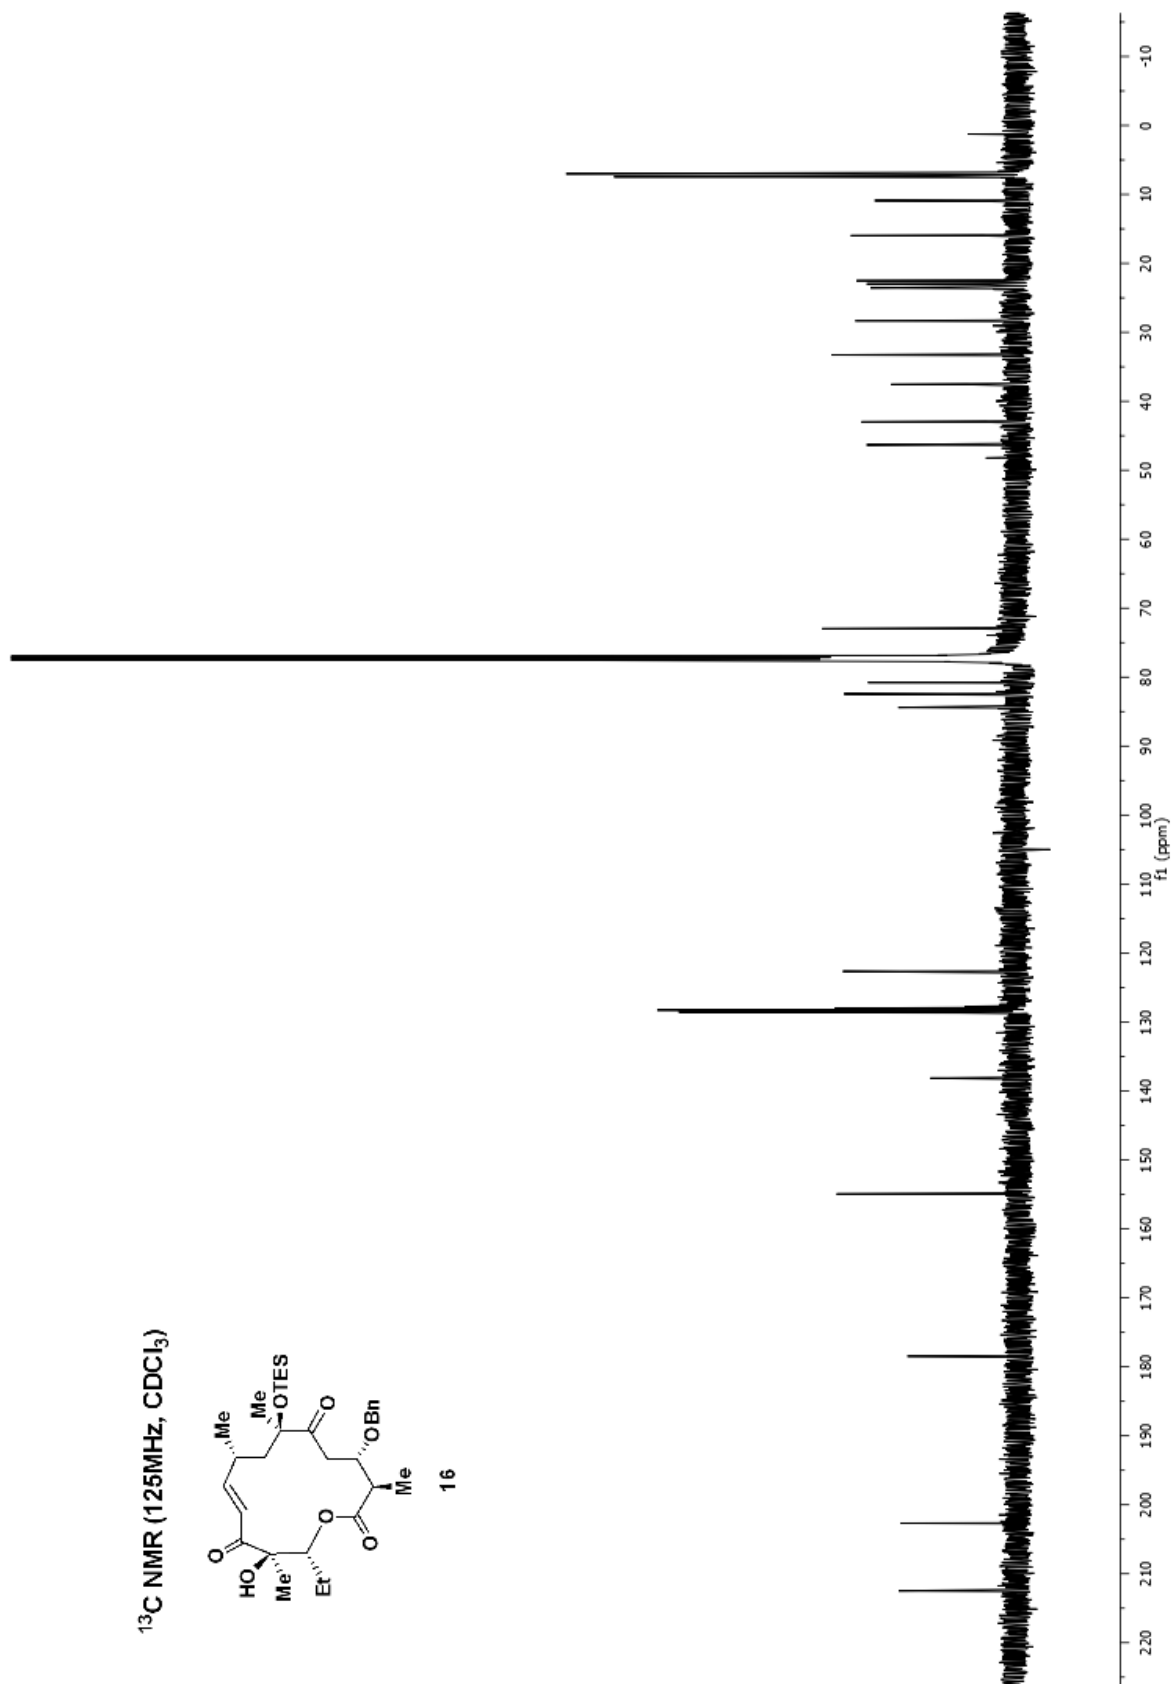

gCOSY, NOSEY and gHMBC of compound 16

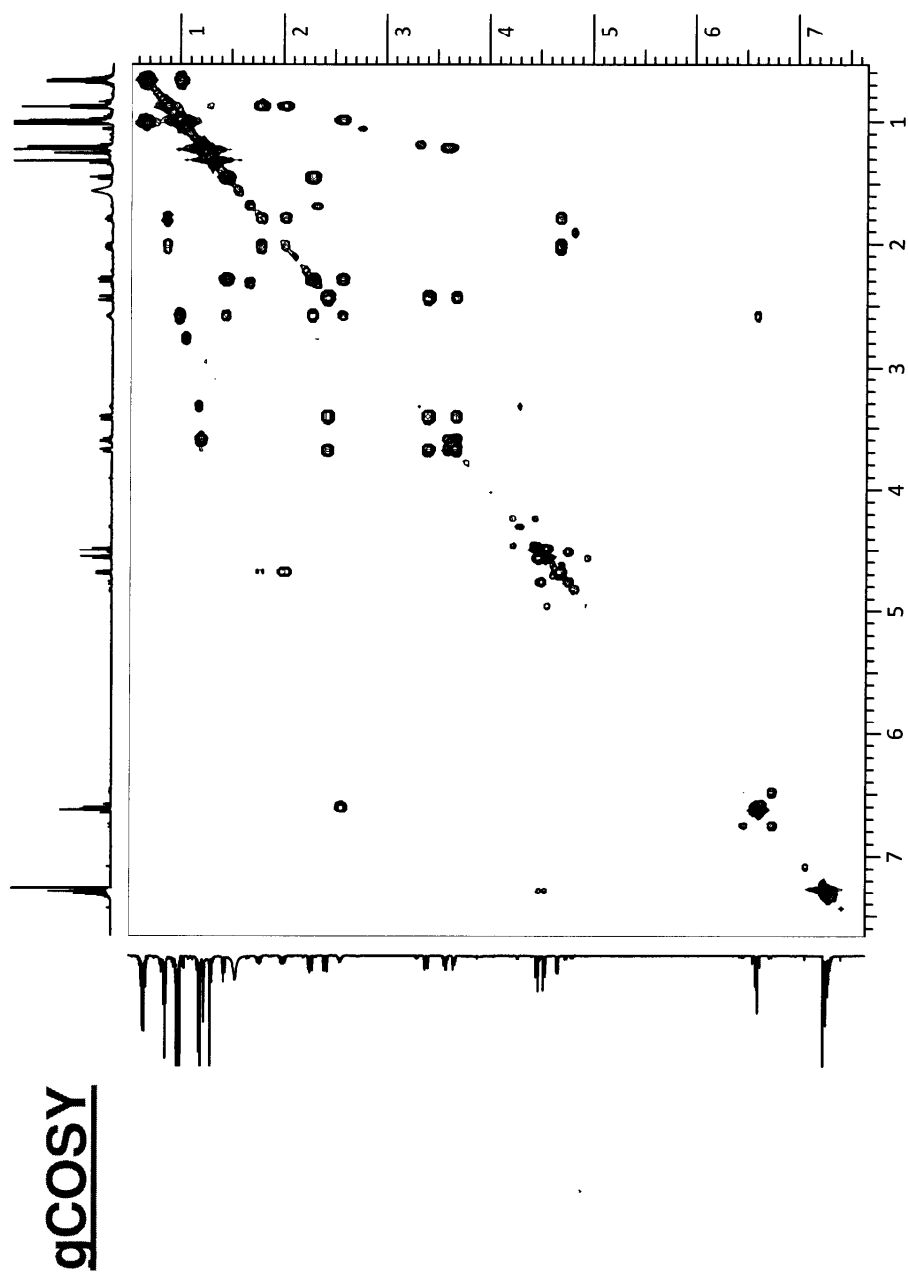

# NOSEY

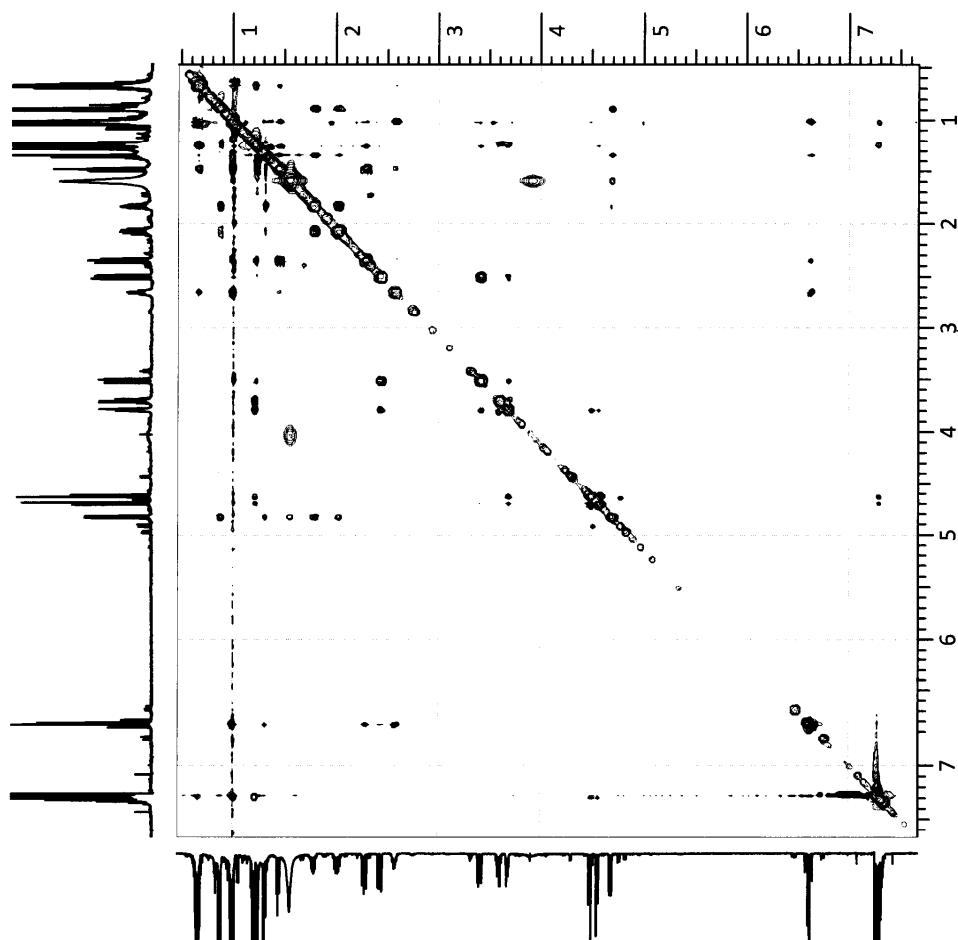

# gHMBC

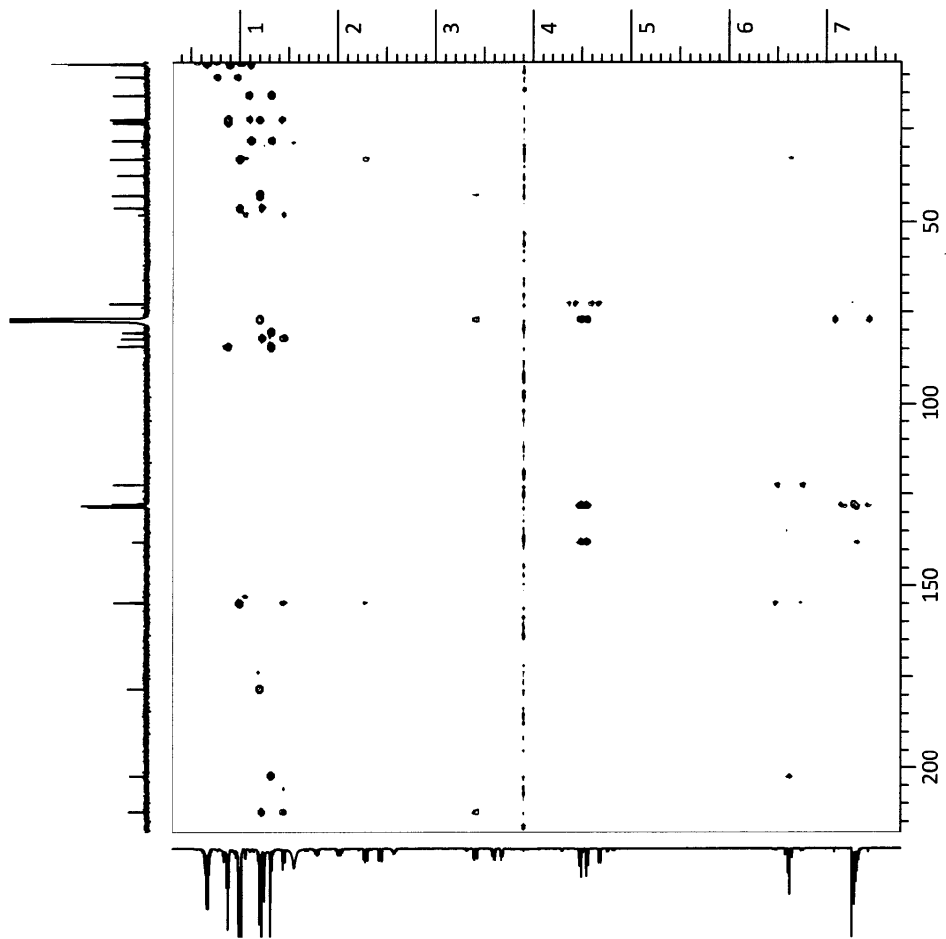



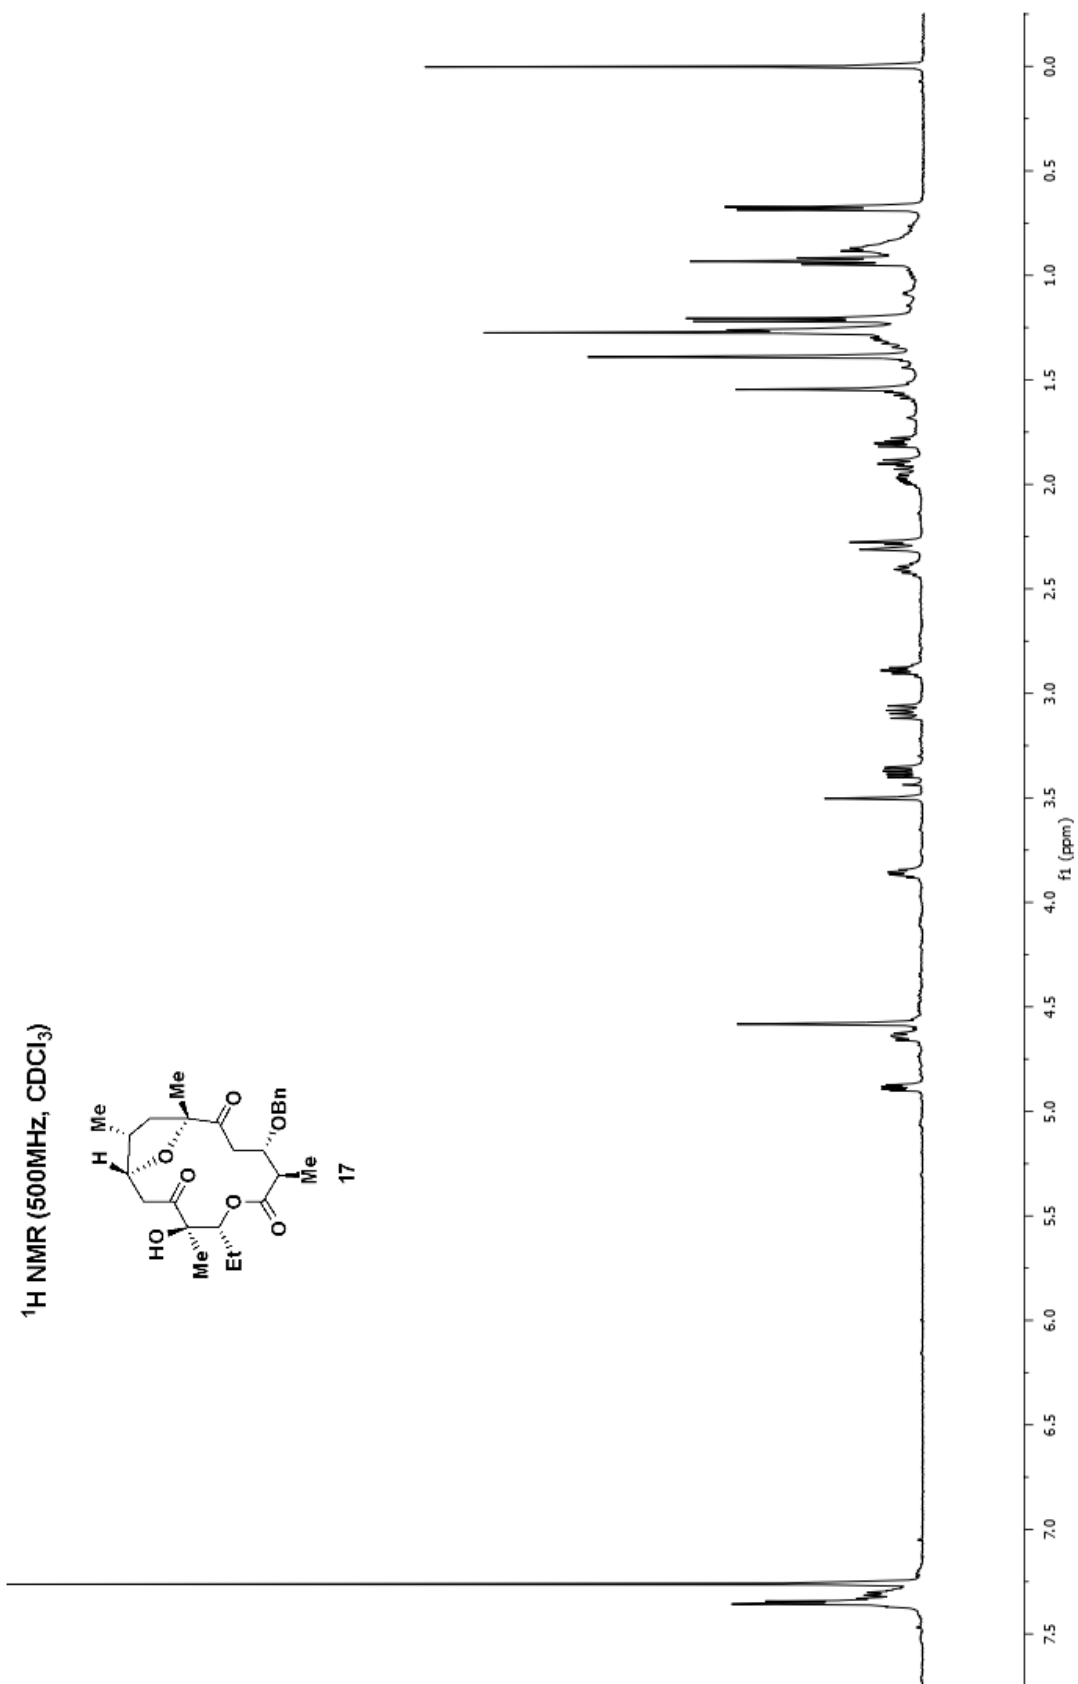

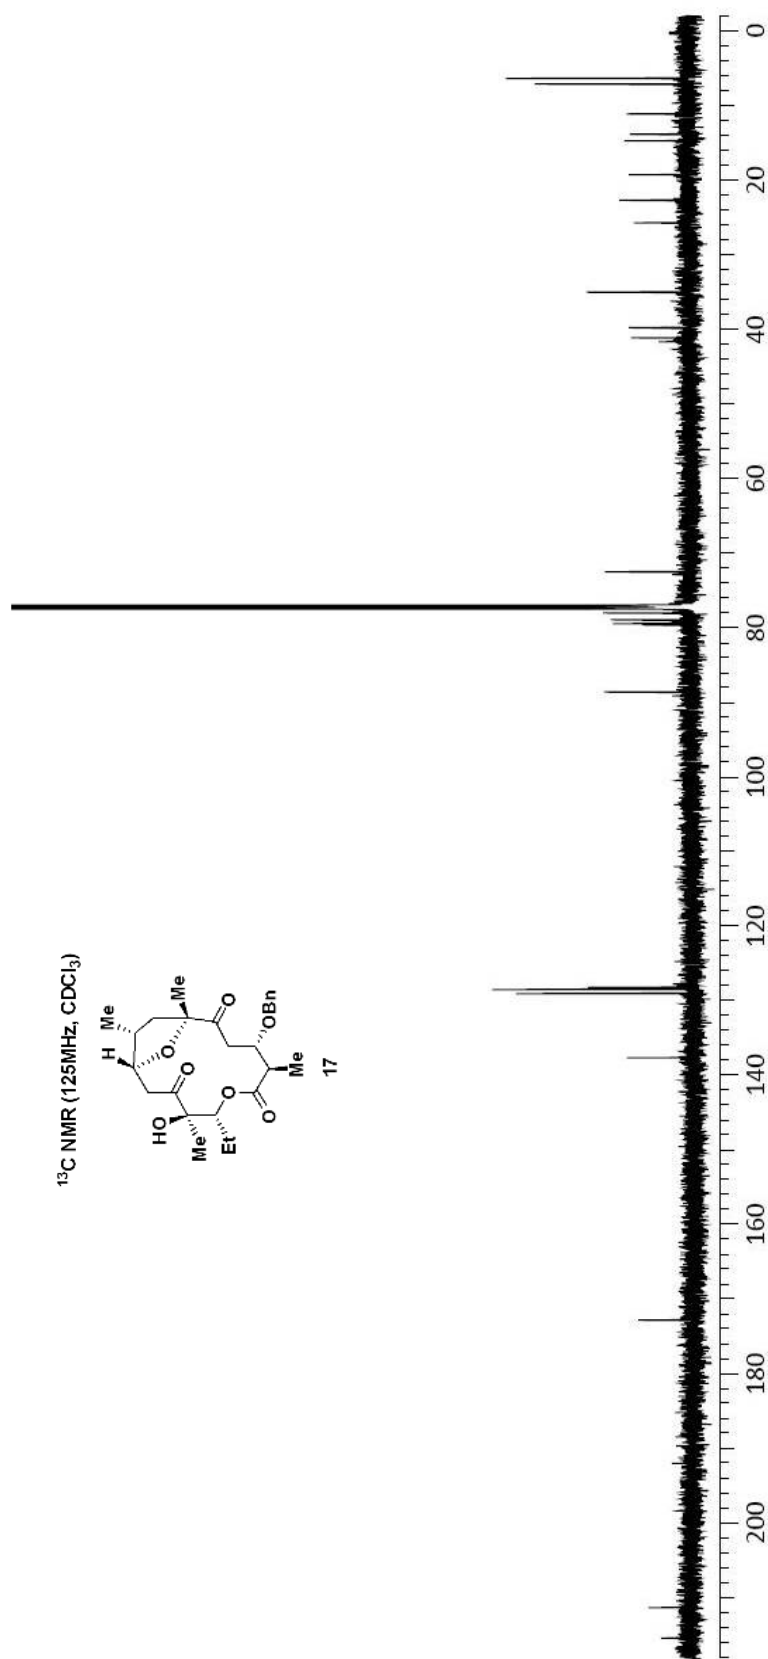

# gCOSY

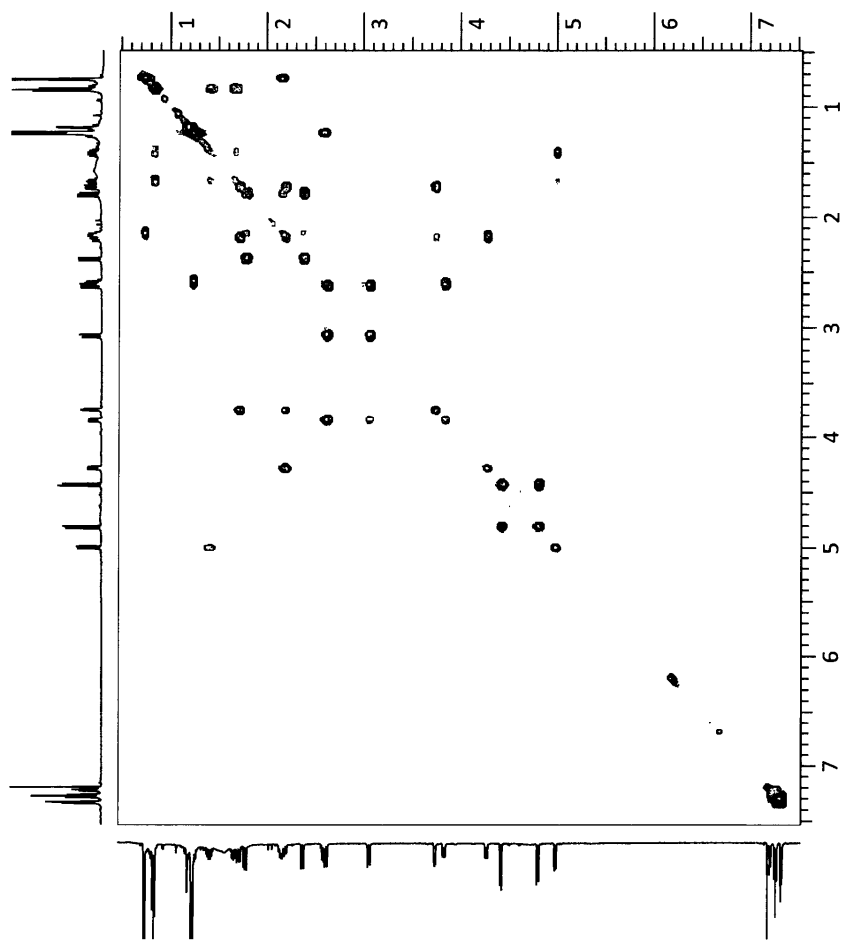

gCOSY, NOSEY and gHMBC of compound 17

**NOESY**  
*correlations*

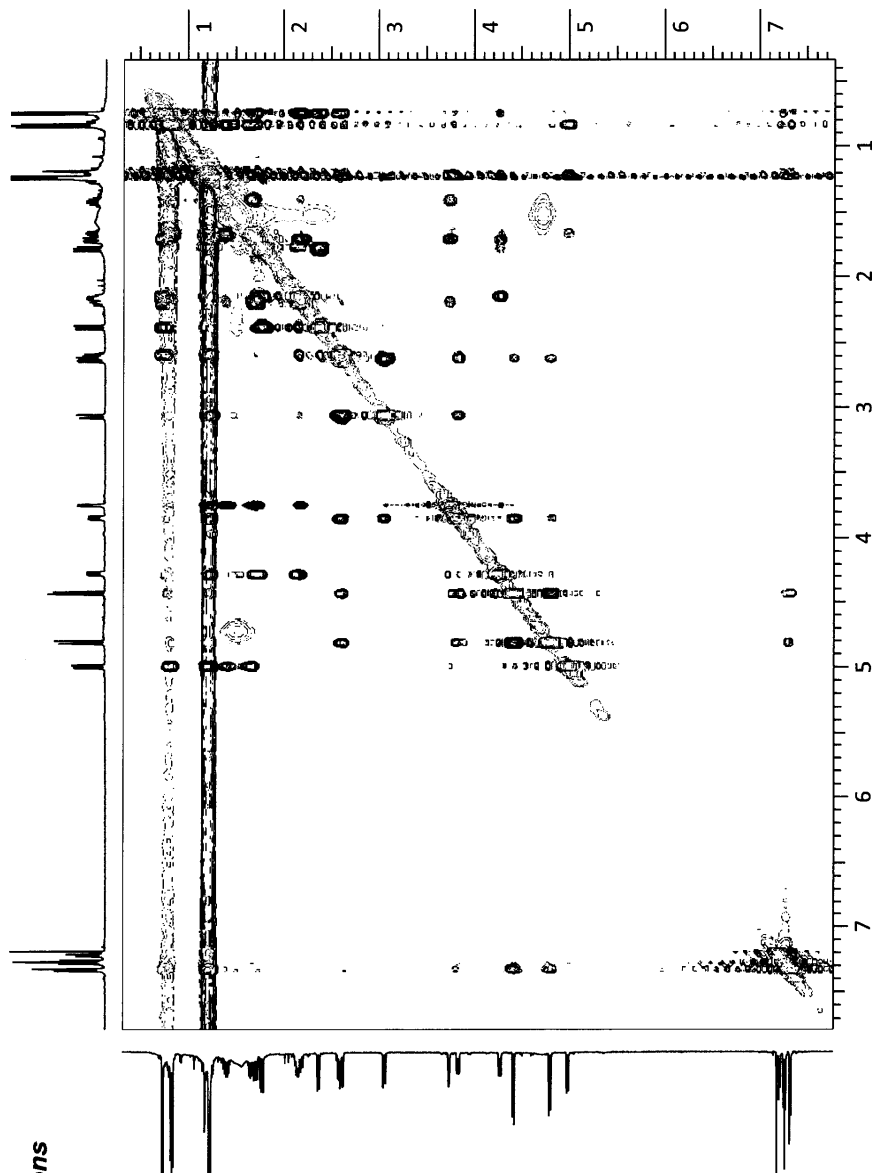

**gHMBC**  
*correlations*

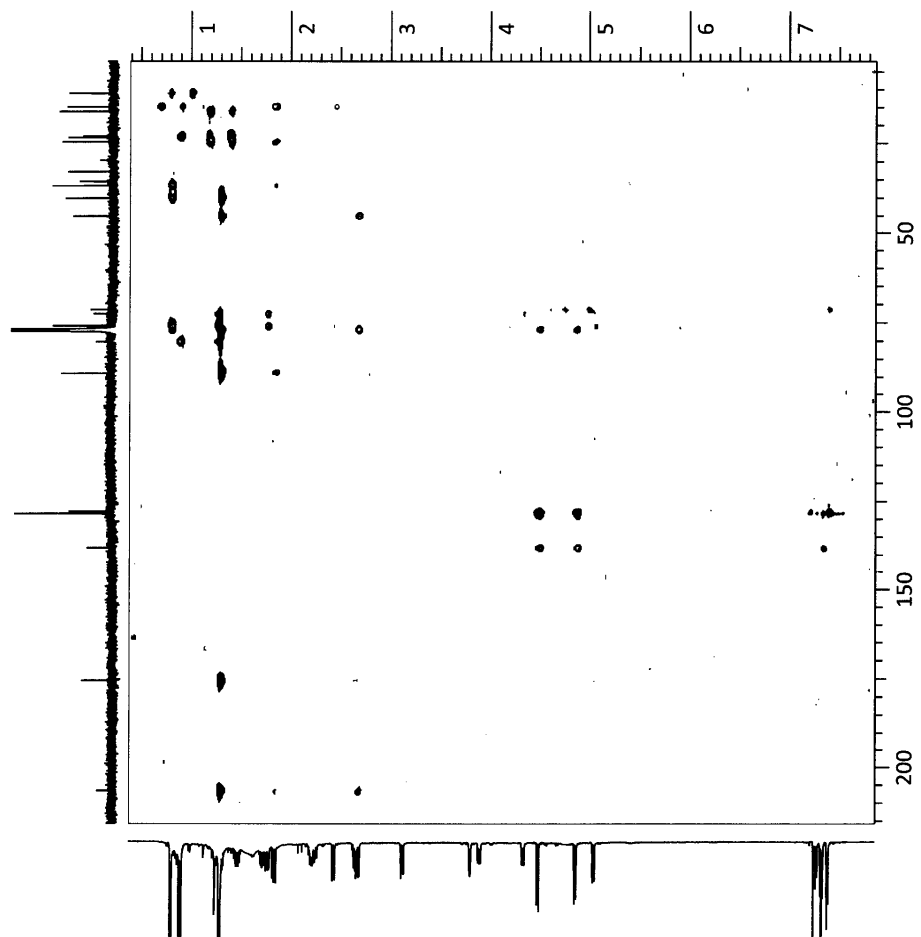

<sup>1</sup>H NMR (500MHz, CDCl<sub>3</sub>)

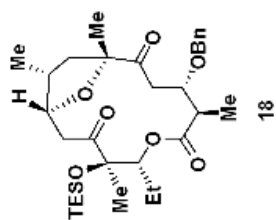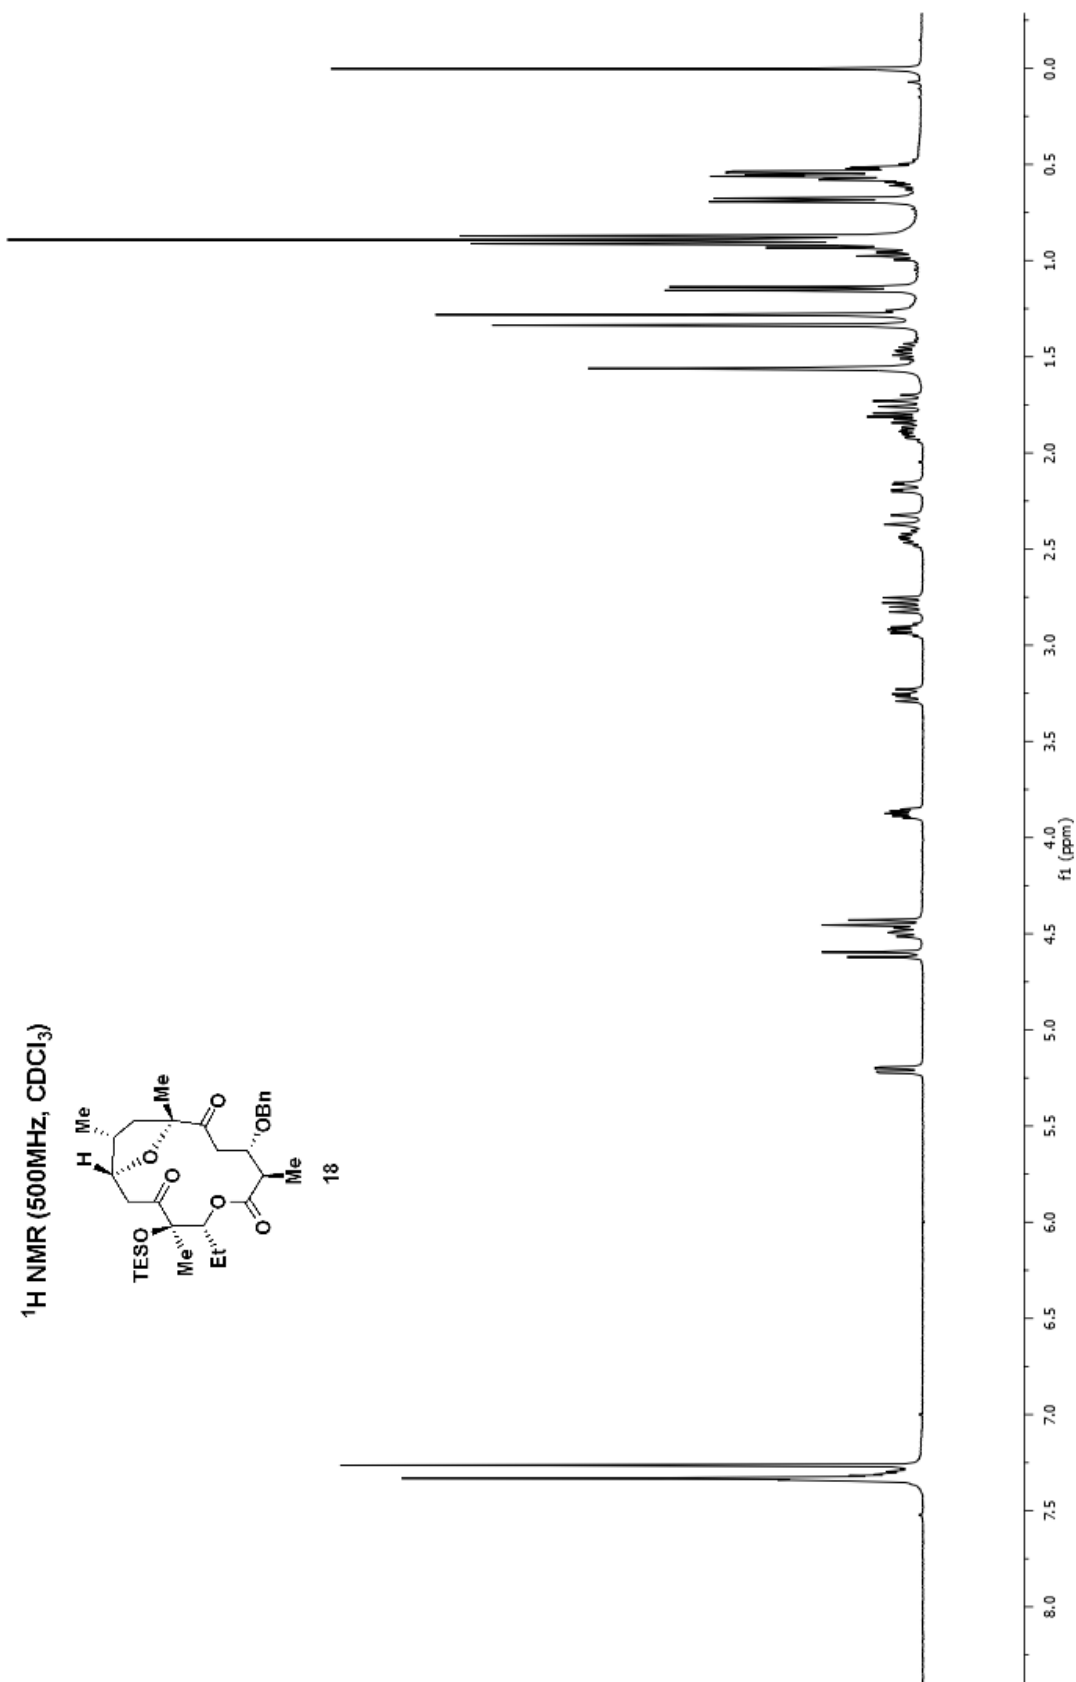

$^{13}\text{C}$  NMR (125MHz,  $\text{CDCl}_3$ )

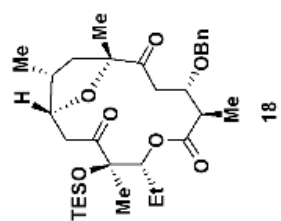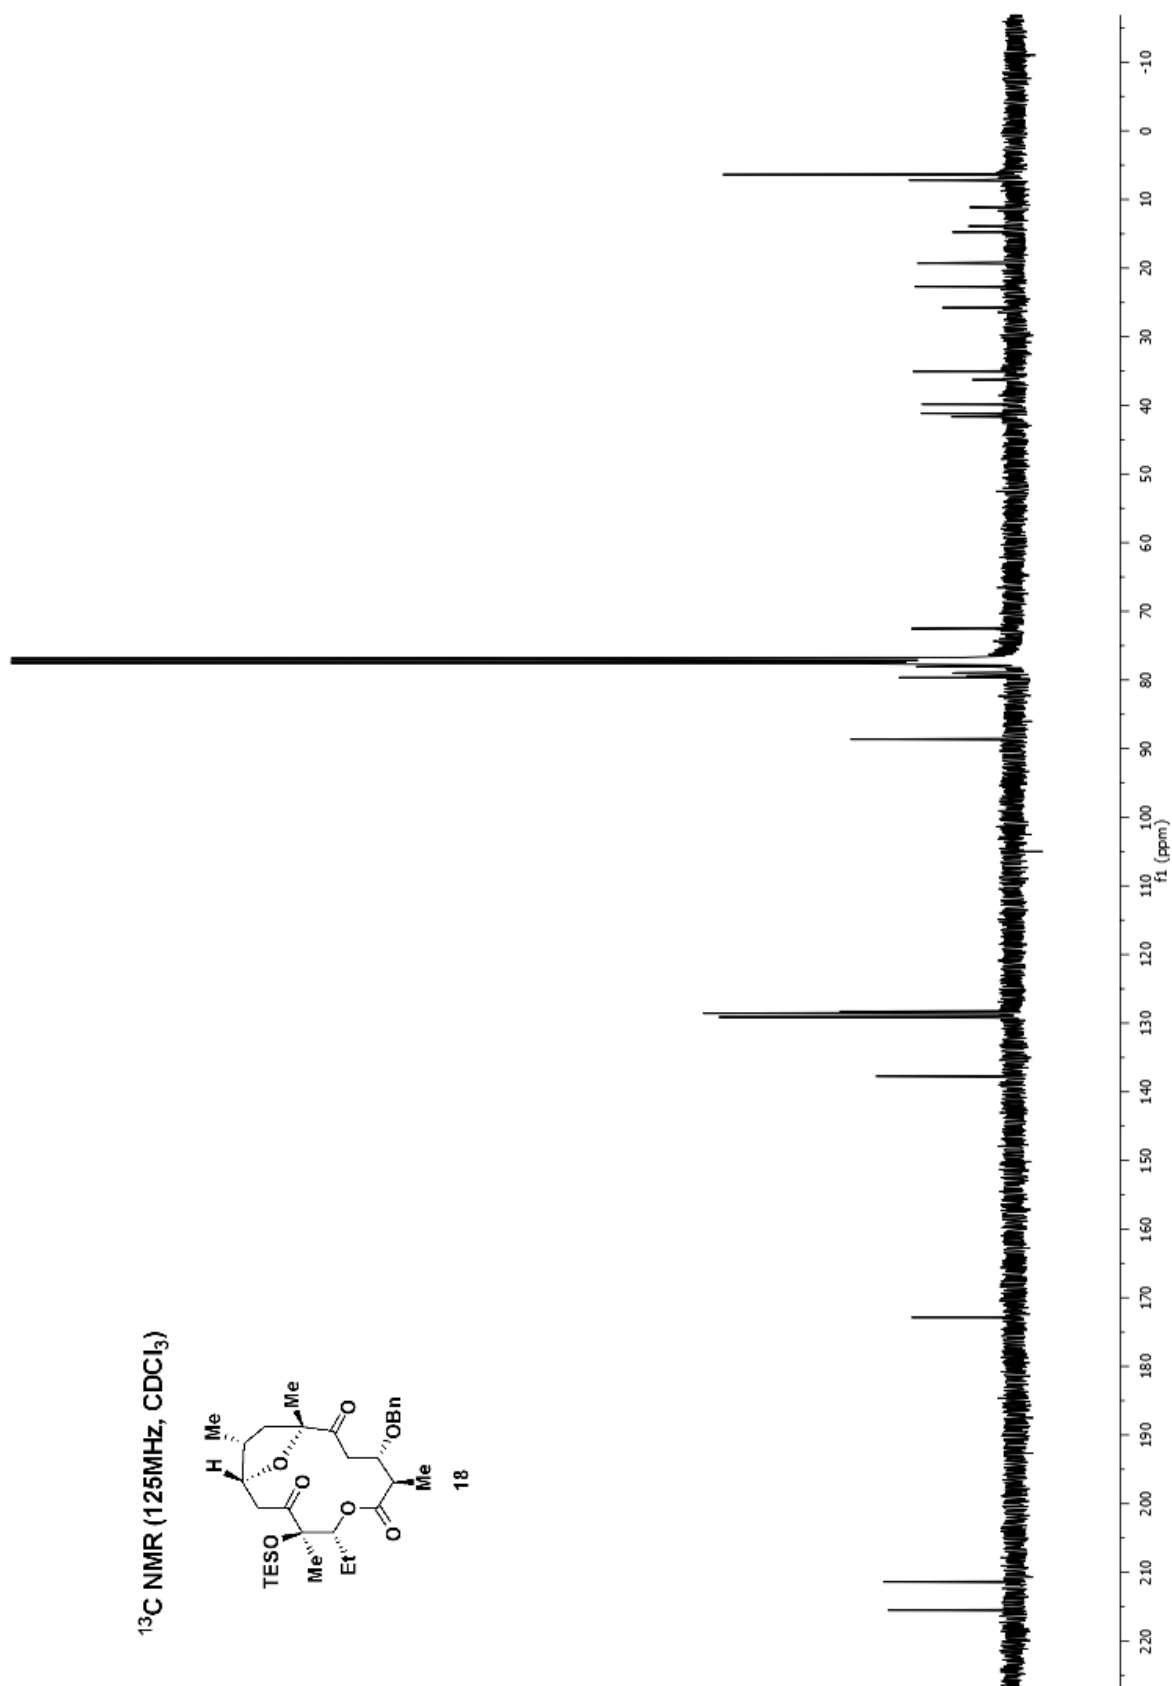

gCOSY, NOSEY, gHMBC and HETCOR of compound 18

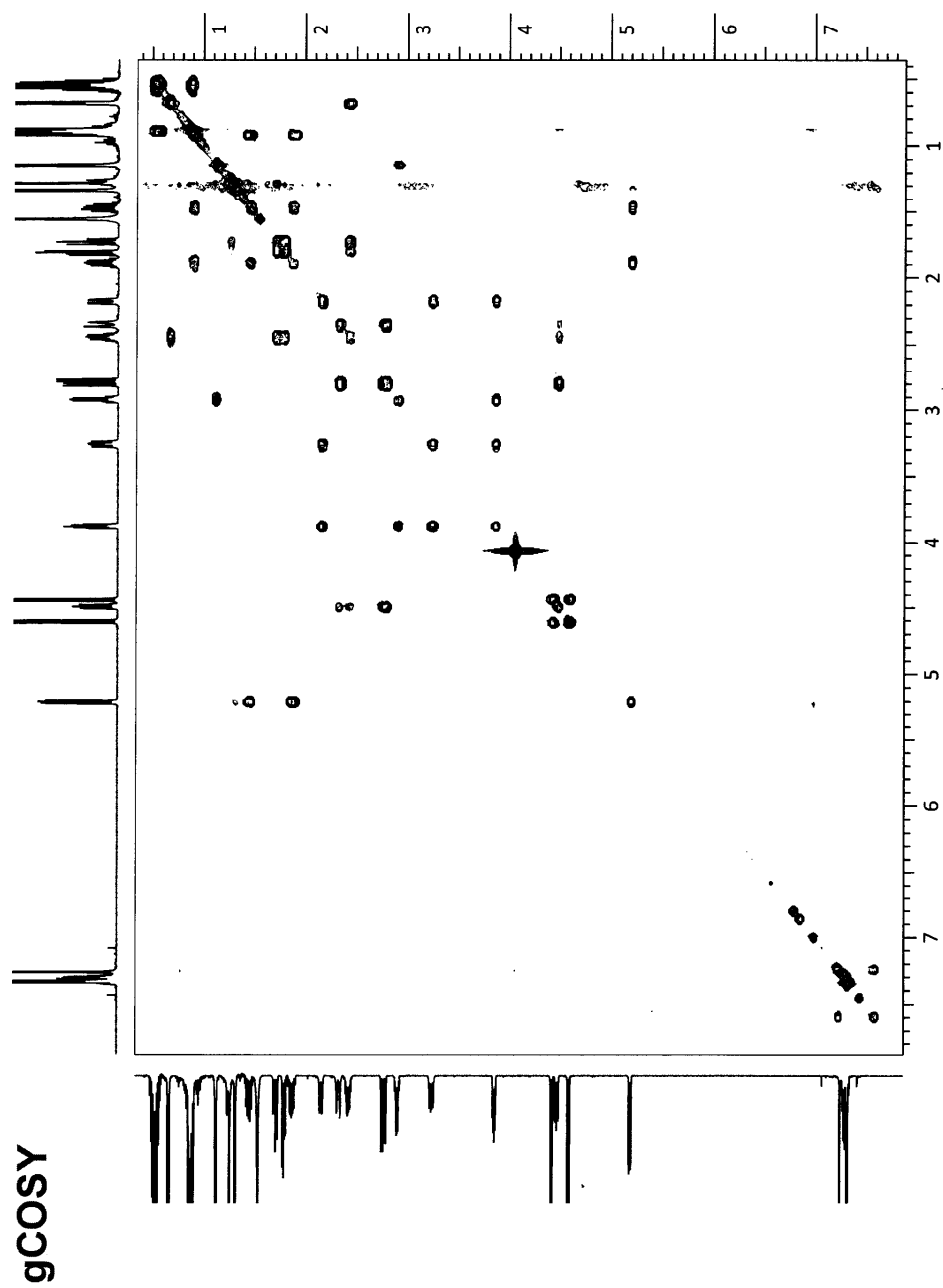



# NOESY

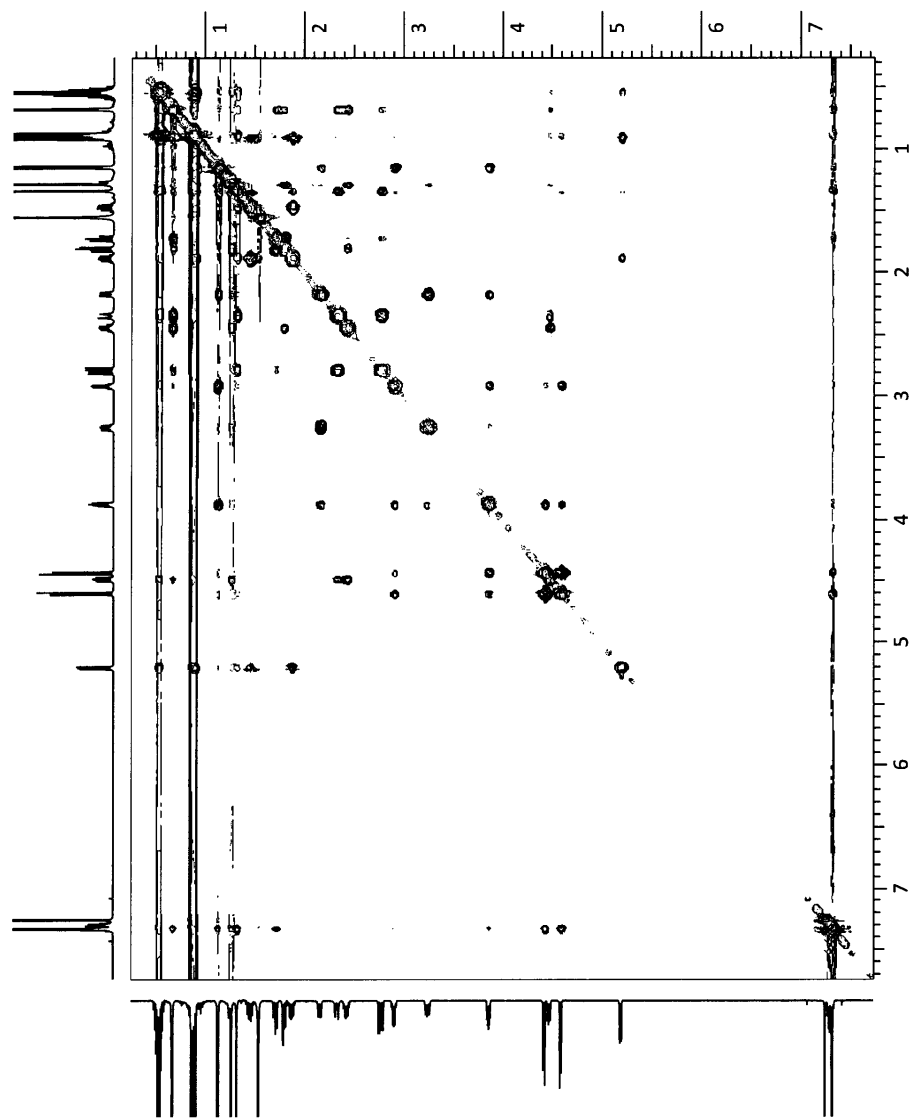

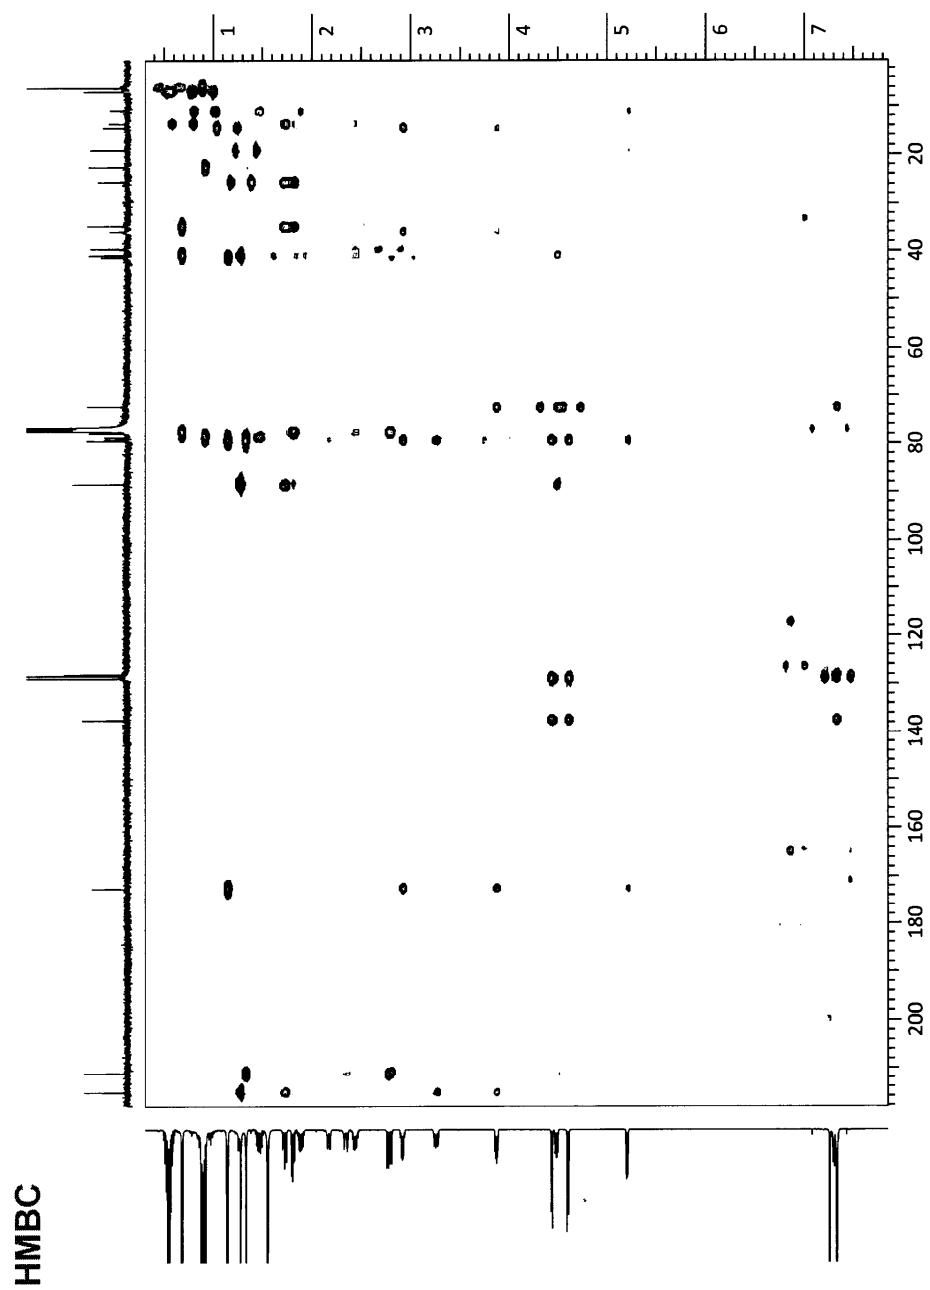

# One-bond heterocorrelation (HETCOR) spectrum

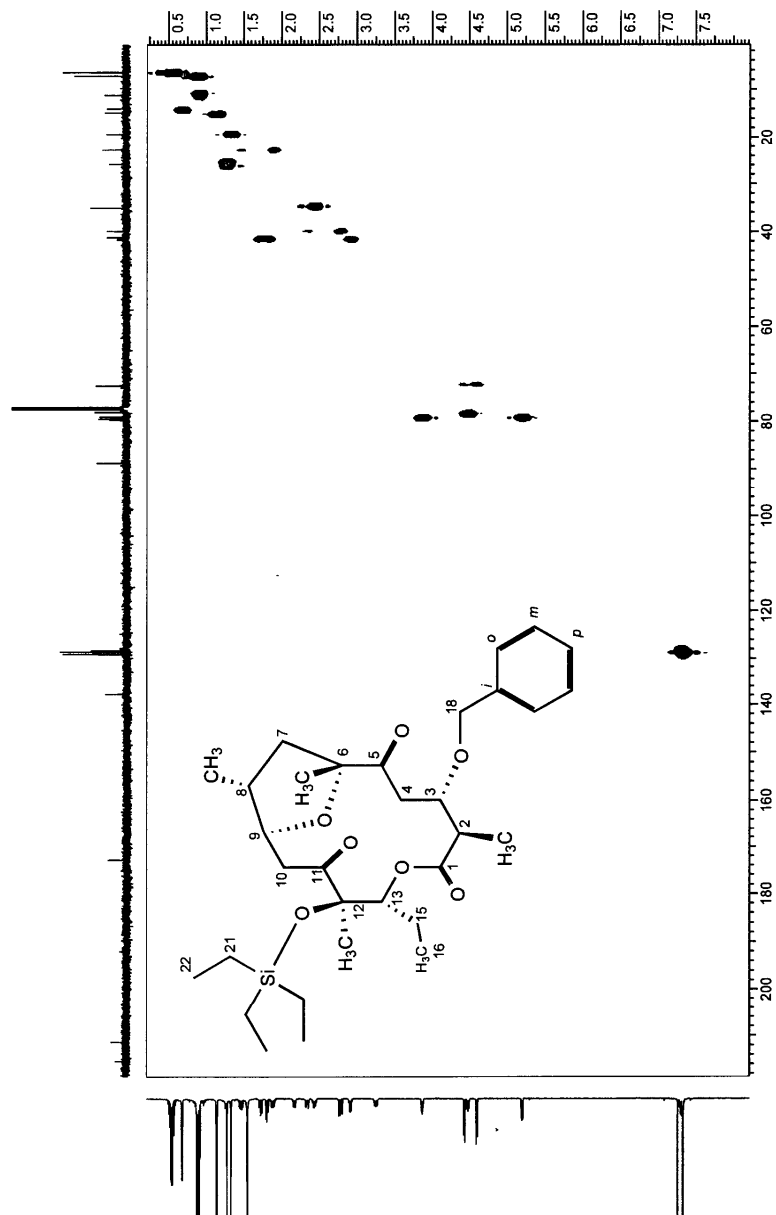

<sup>1</sup>H NMR (500MHz, CDCl<sub>3</sub>)

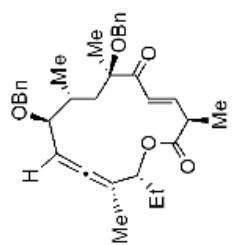

19

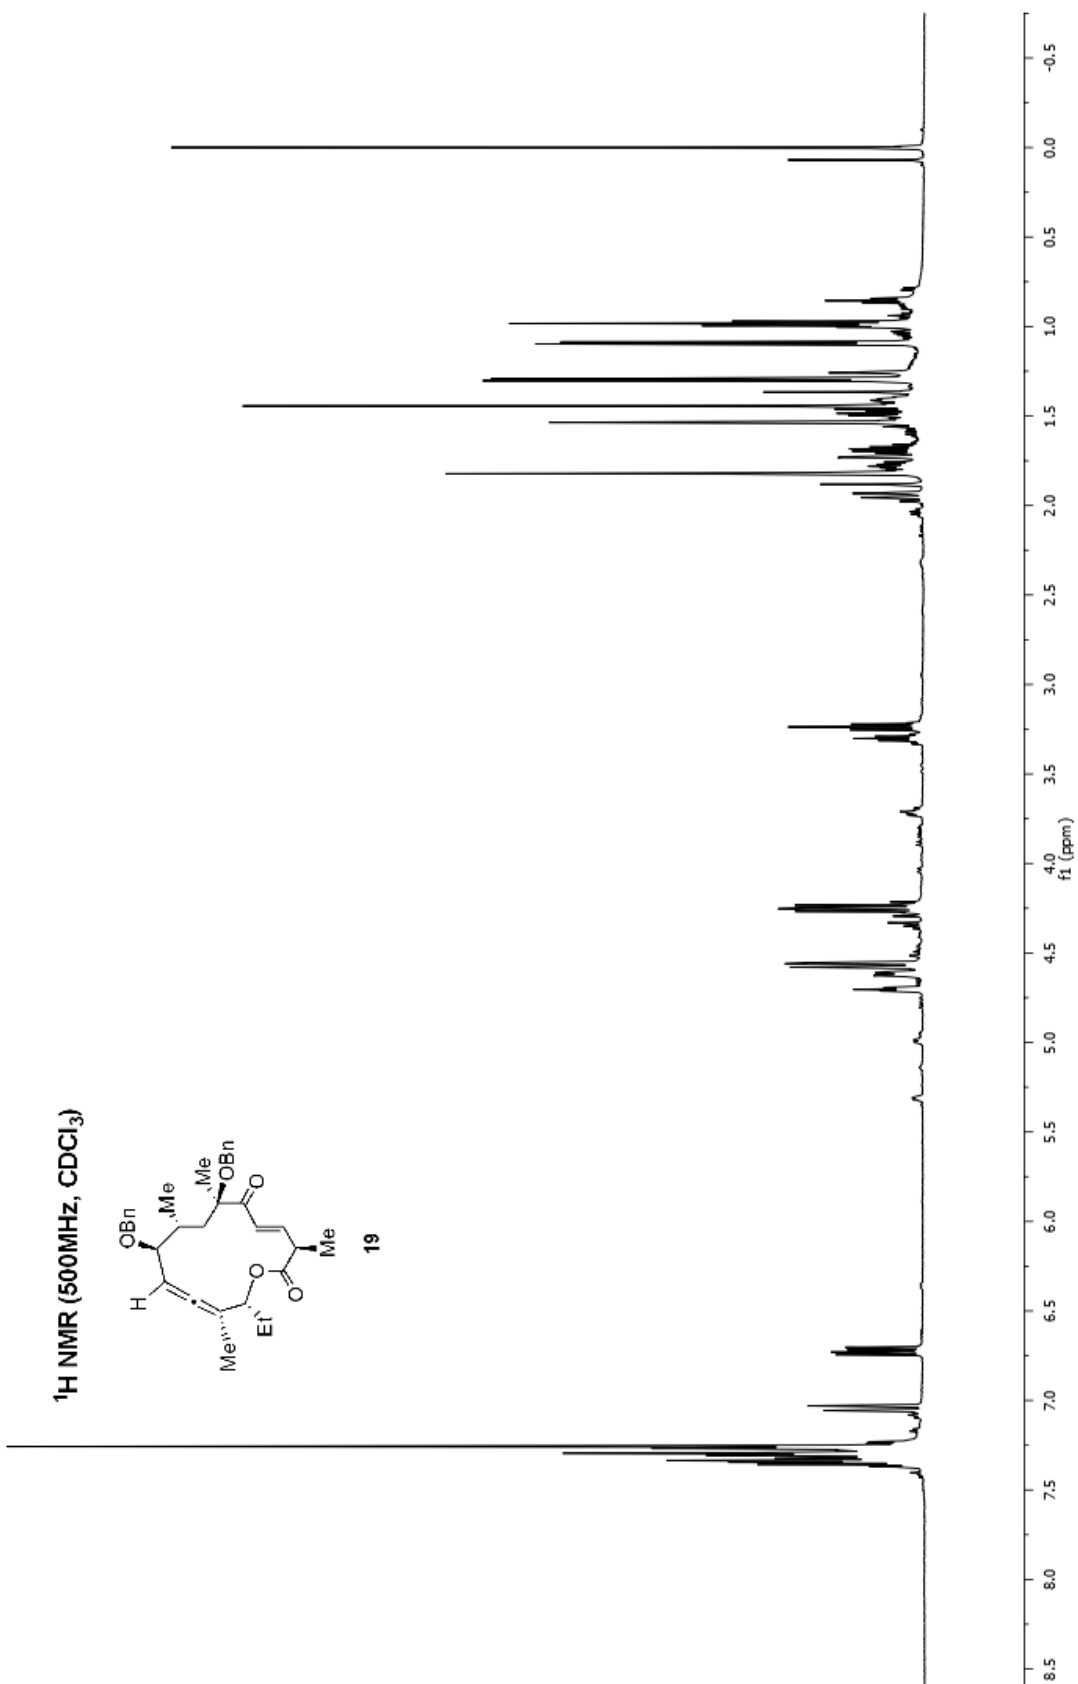

$^{13}\text{C}$  NMR (125MHz,  $\text{CDCl}_3$ )

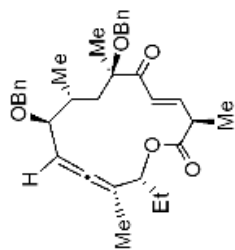

19

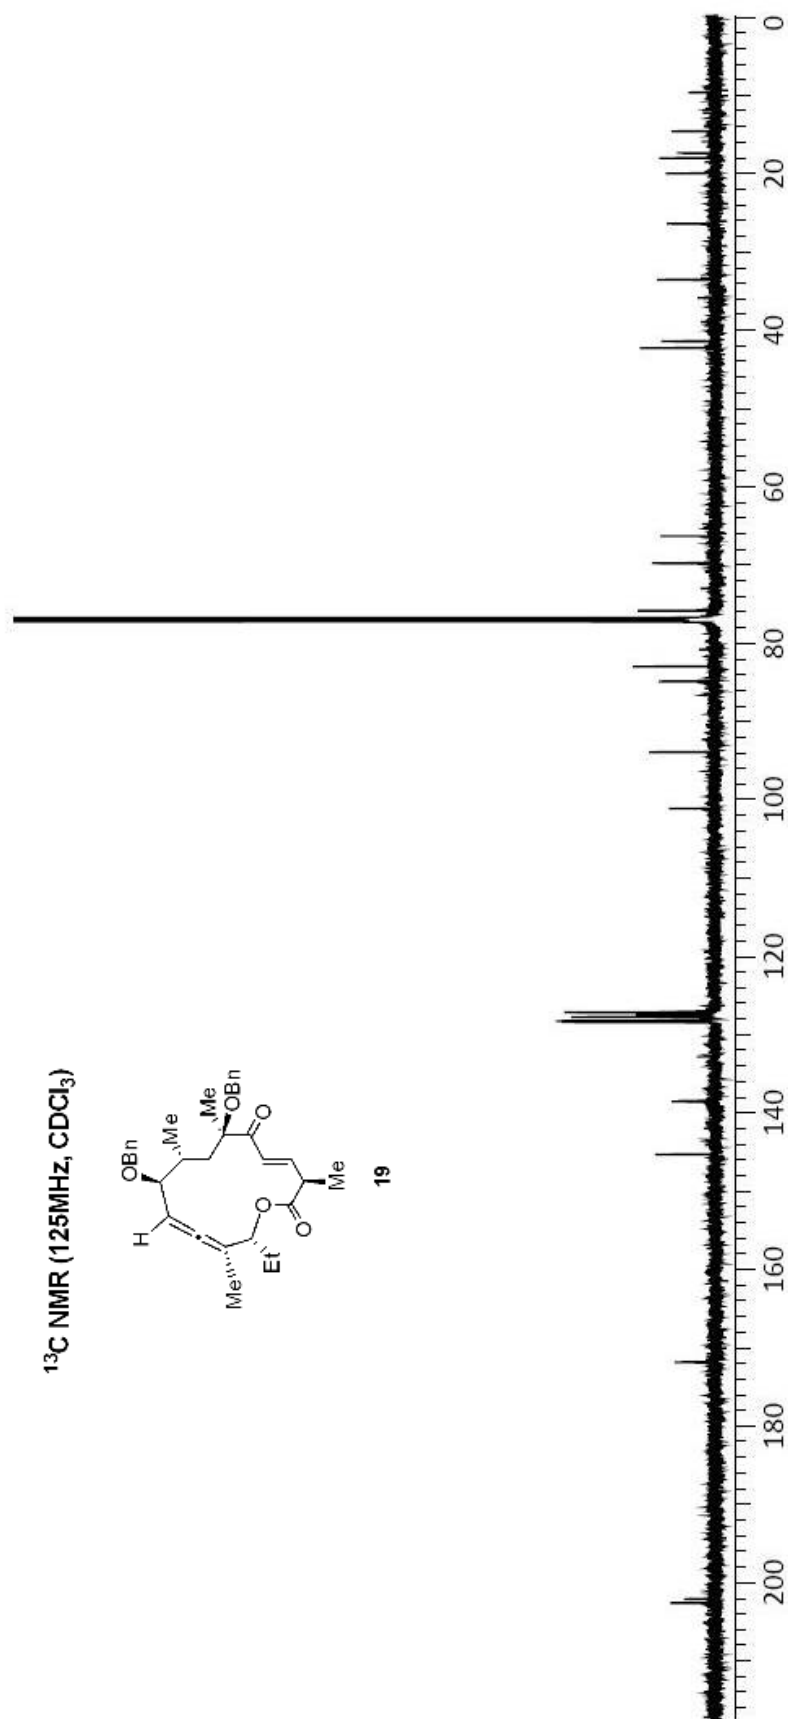

gCOSY, NOSEY, and gHMBC of compound 19

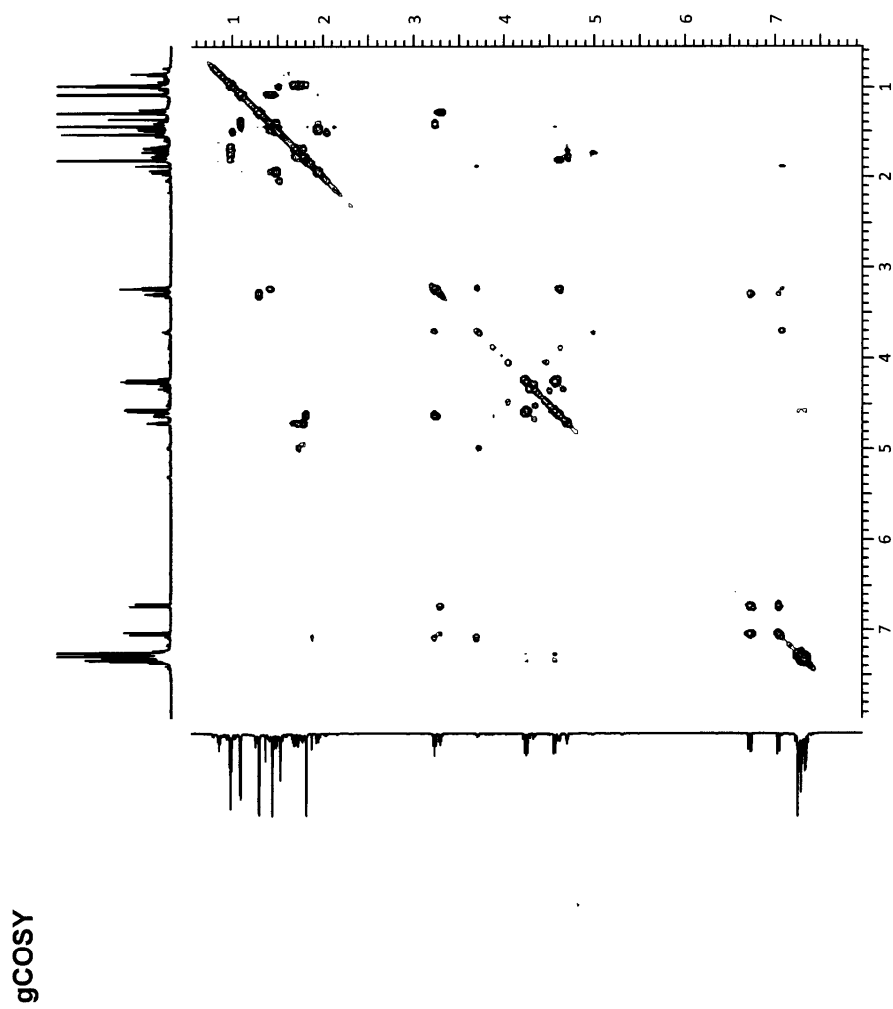

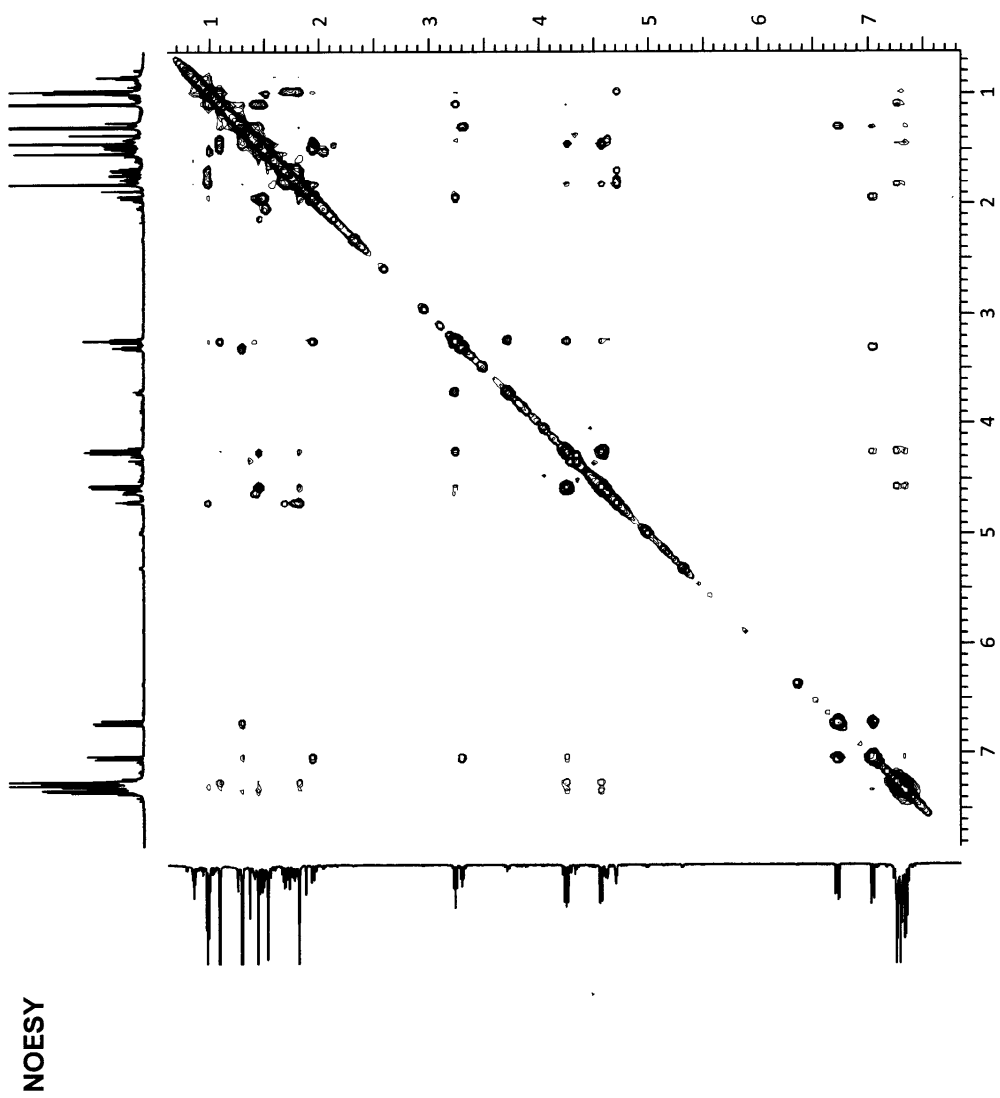

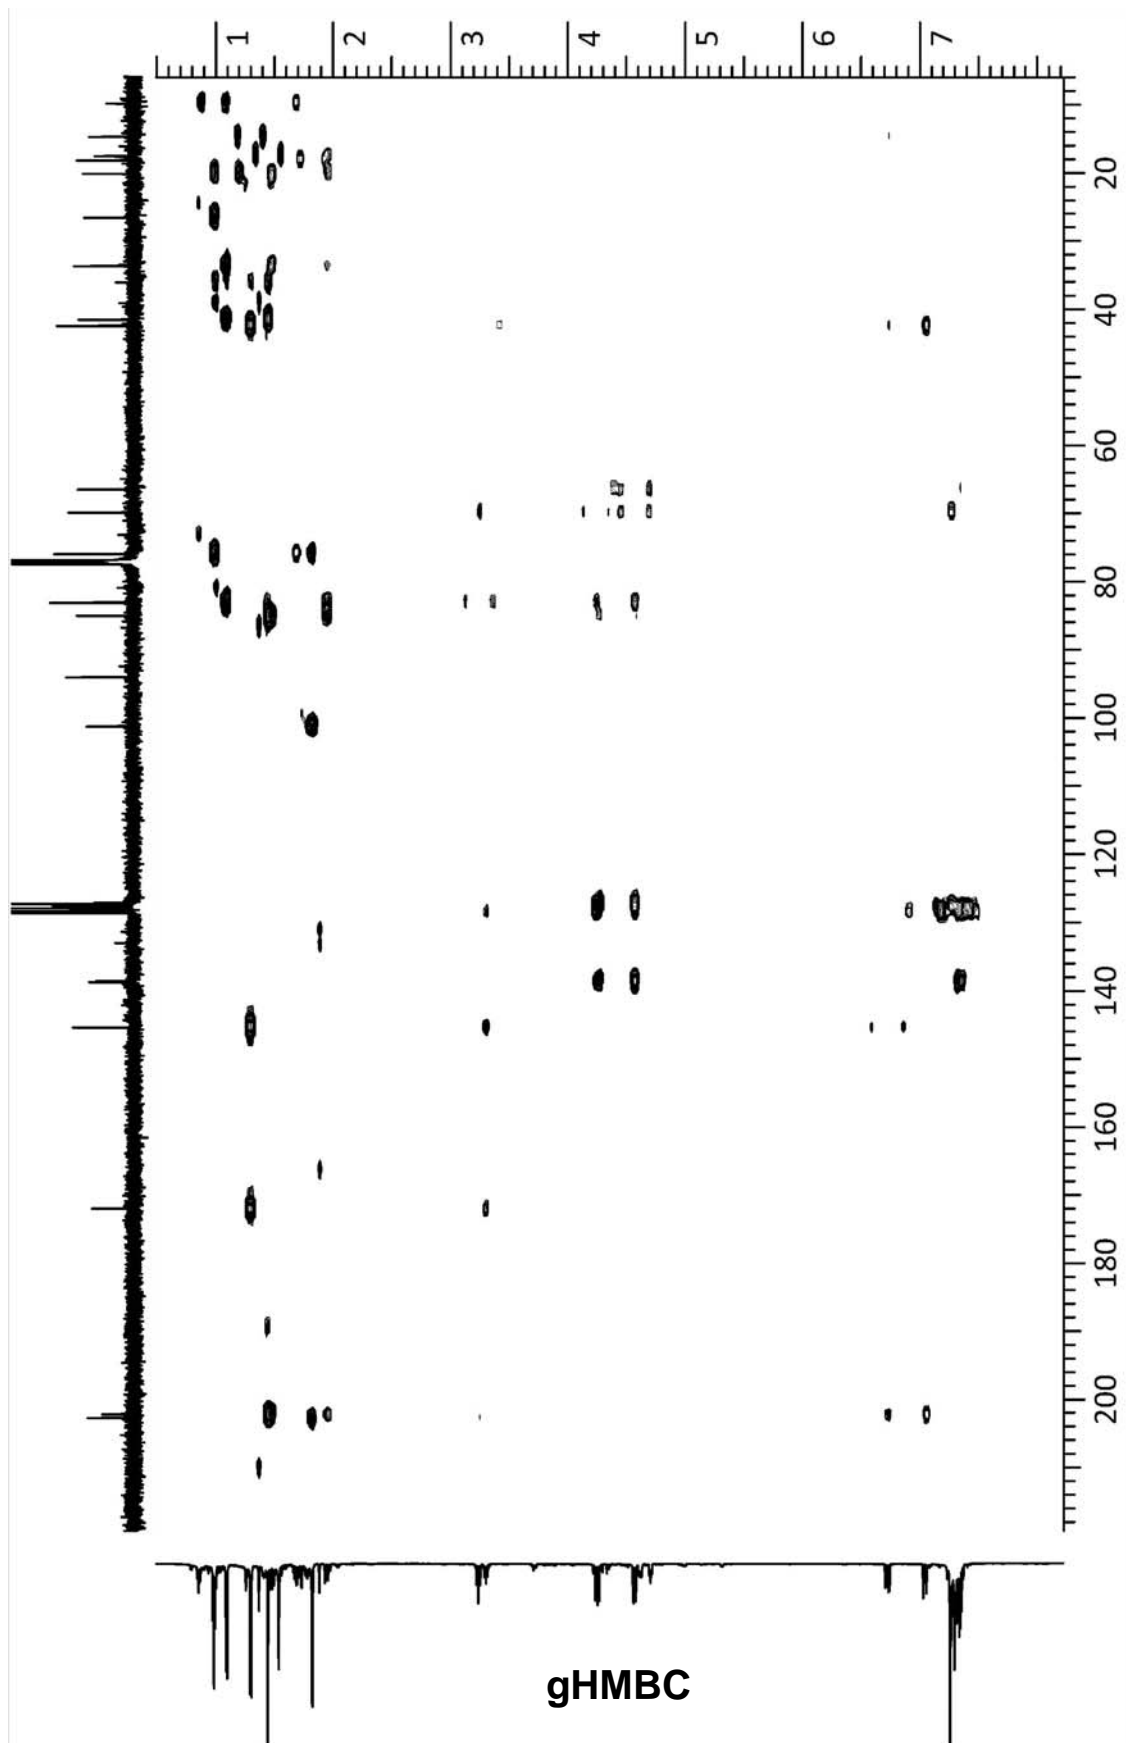

gHMBC



$^1\text{H}$  NMR (500MHz,  $\text{CDCl}_3$ )

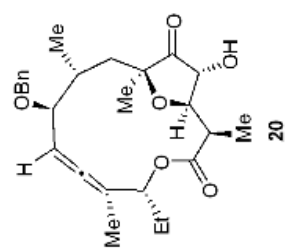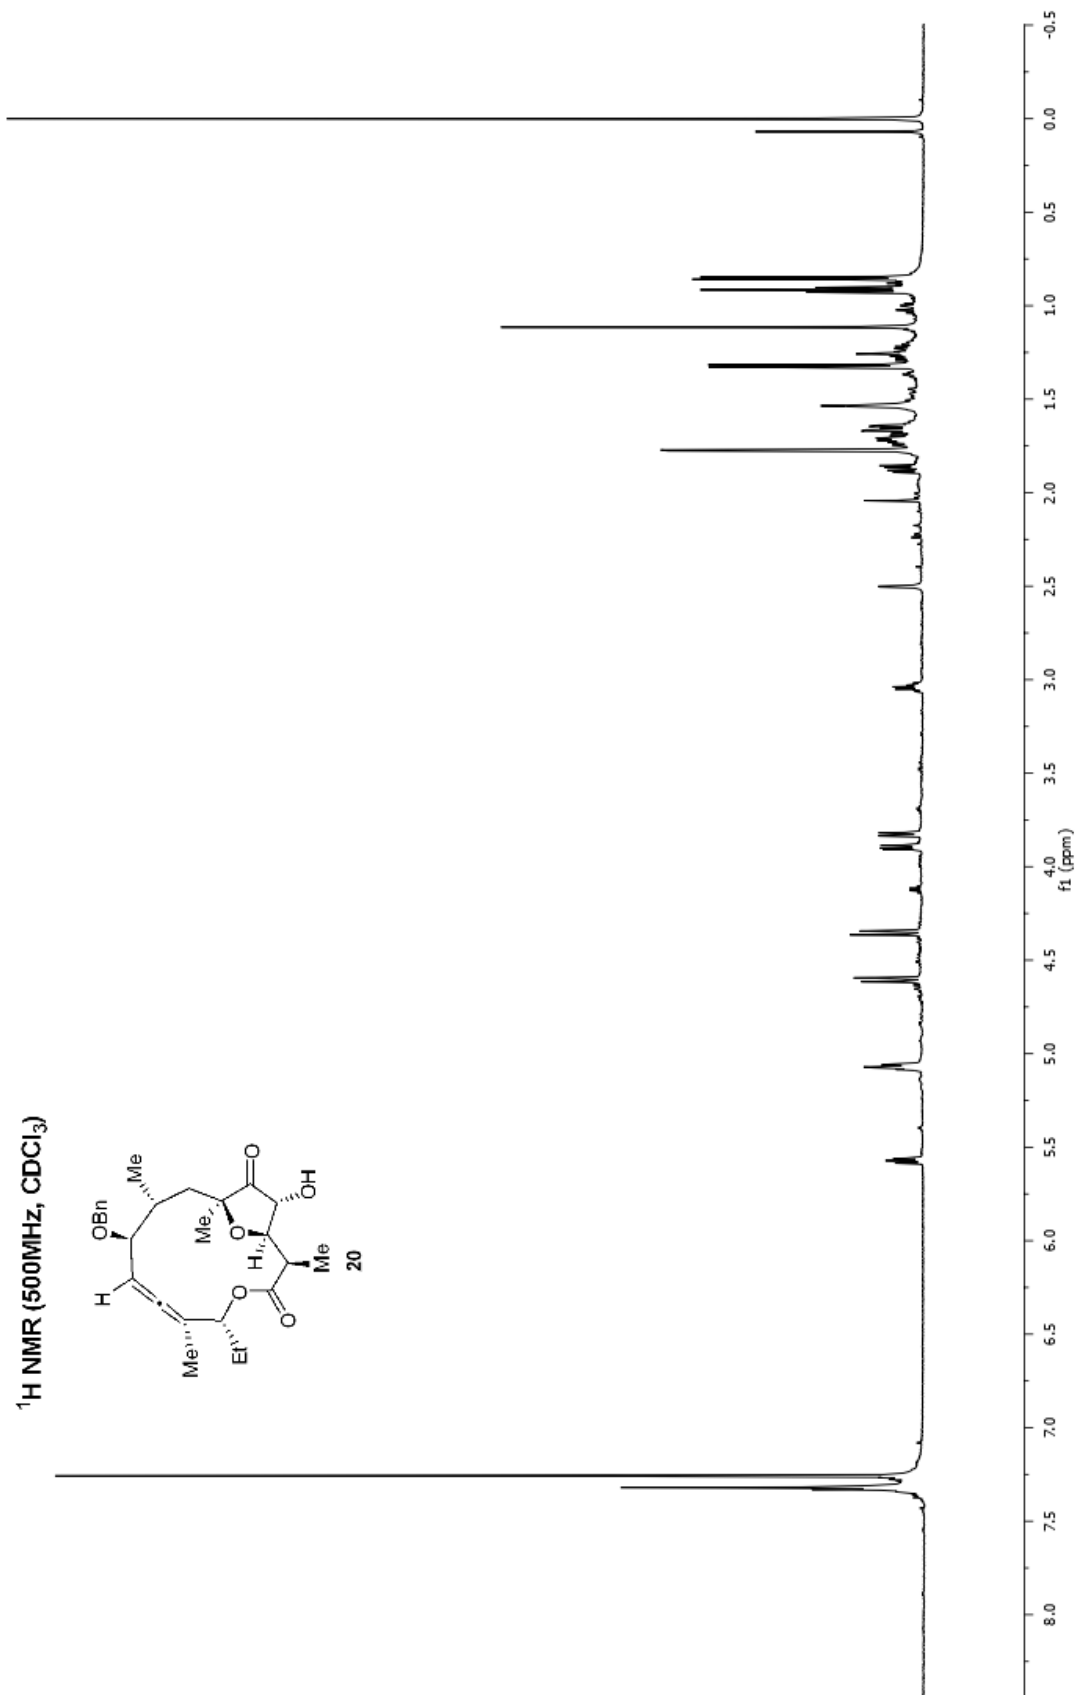

$^{13}\text{C}$  NMR (125MHz,  $\text{CDCl}_3$ )

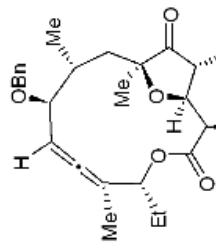

20

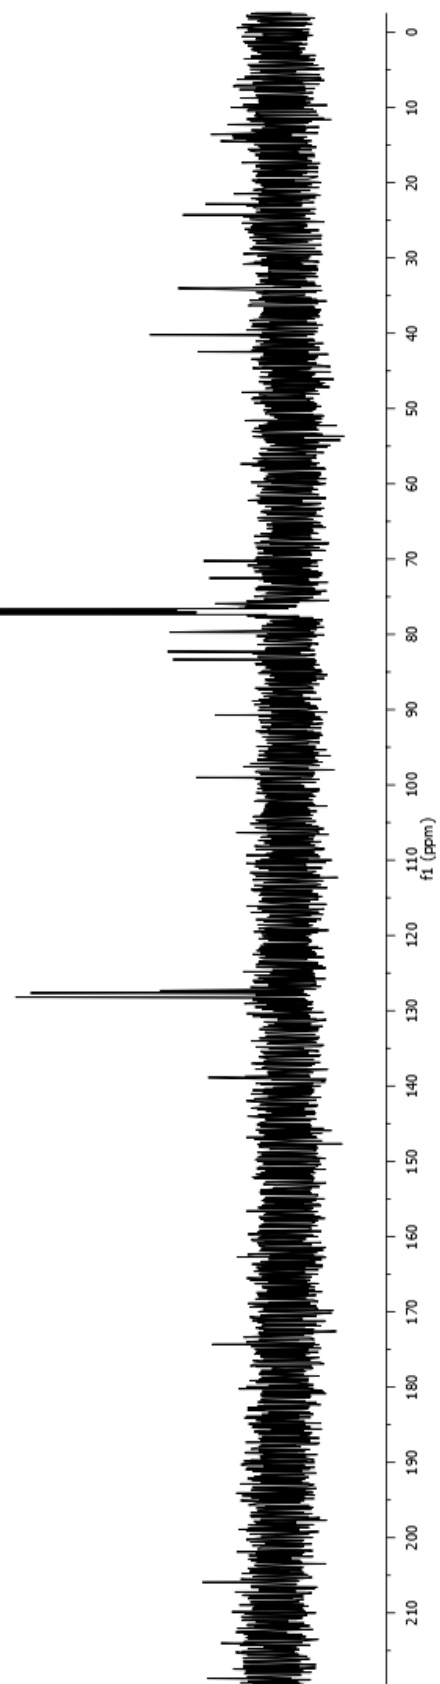

gCOSY, NOSEY, and gHMBC of compound 20

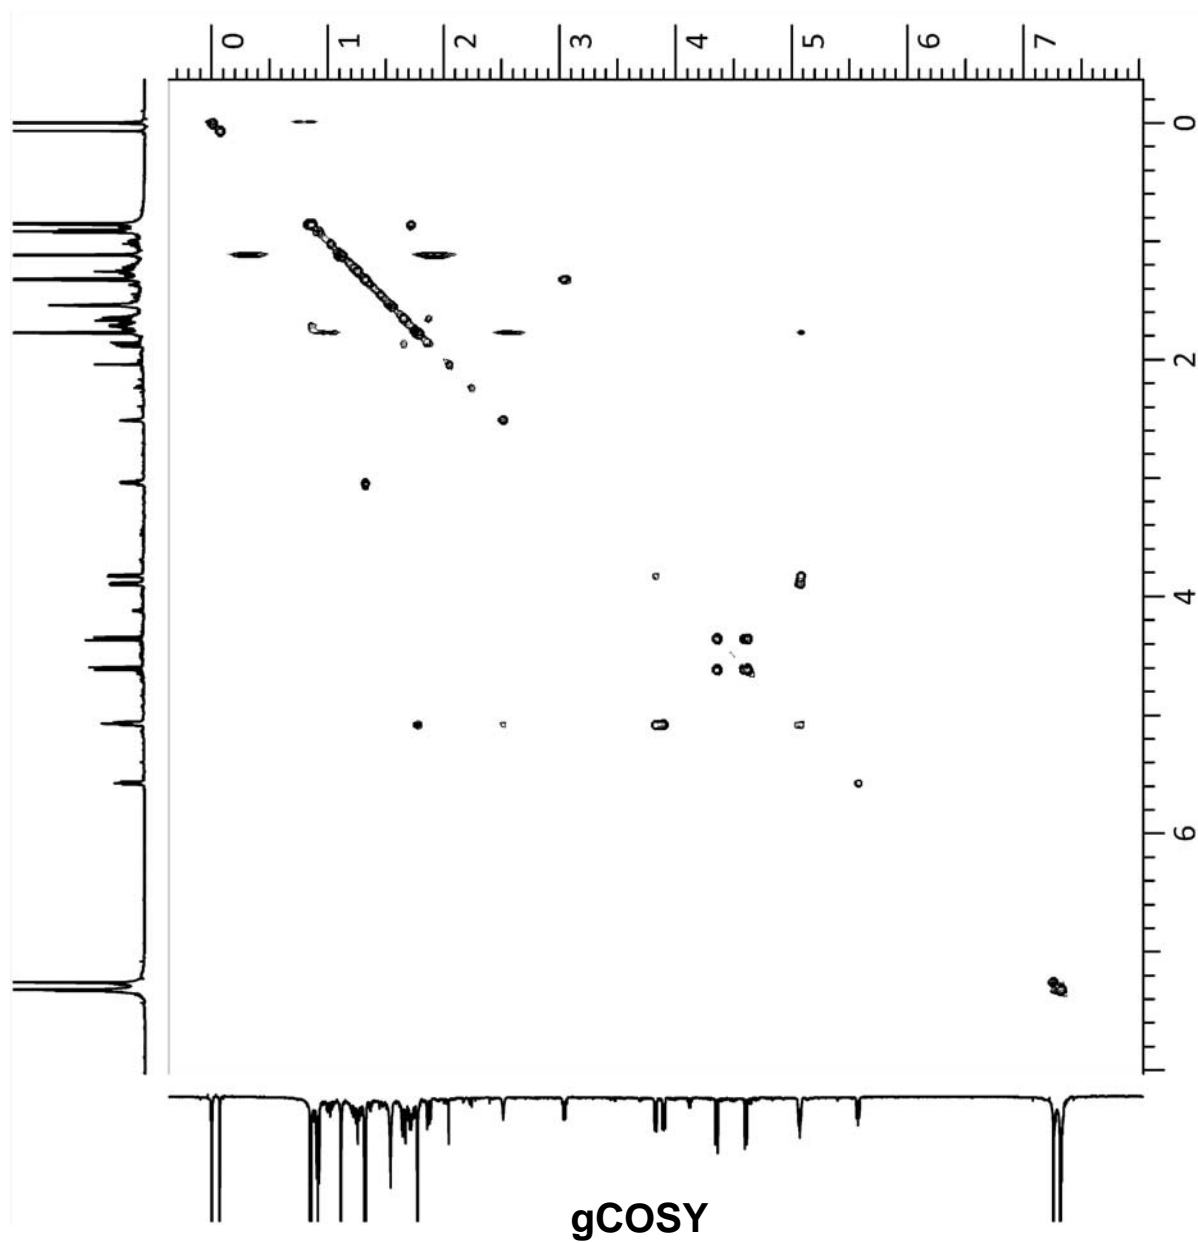

# NOESY

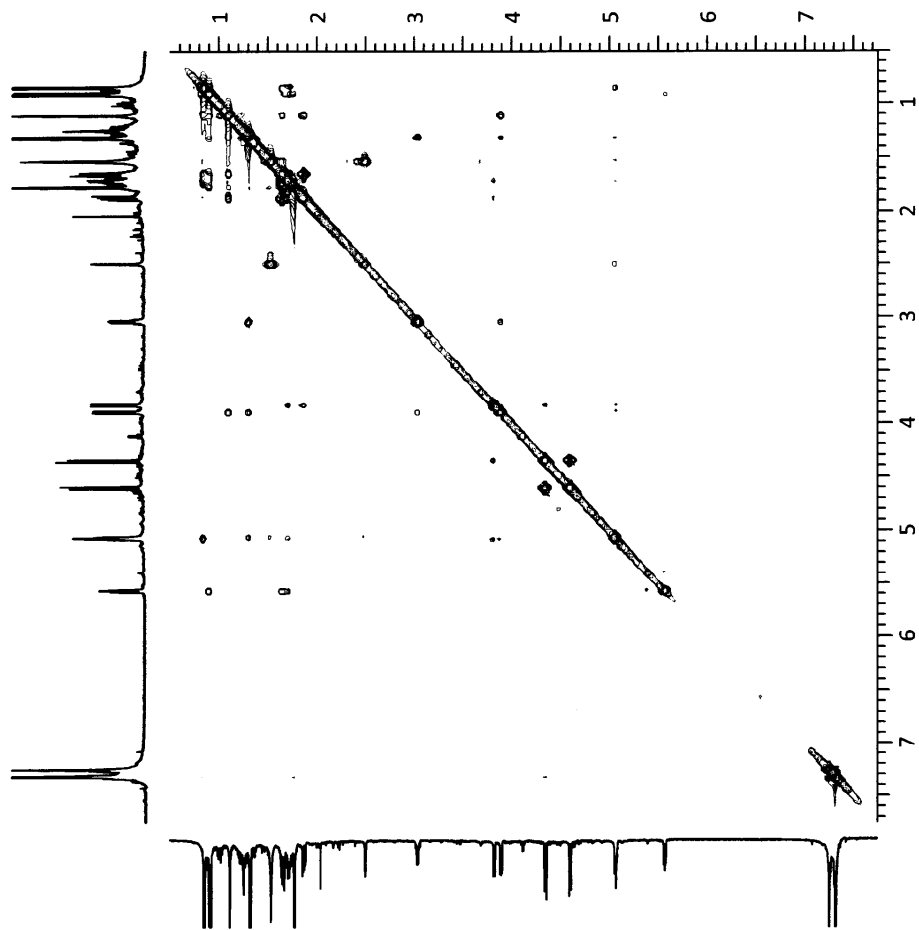

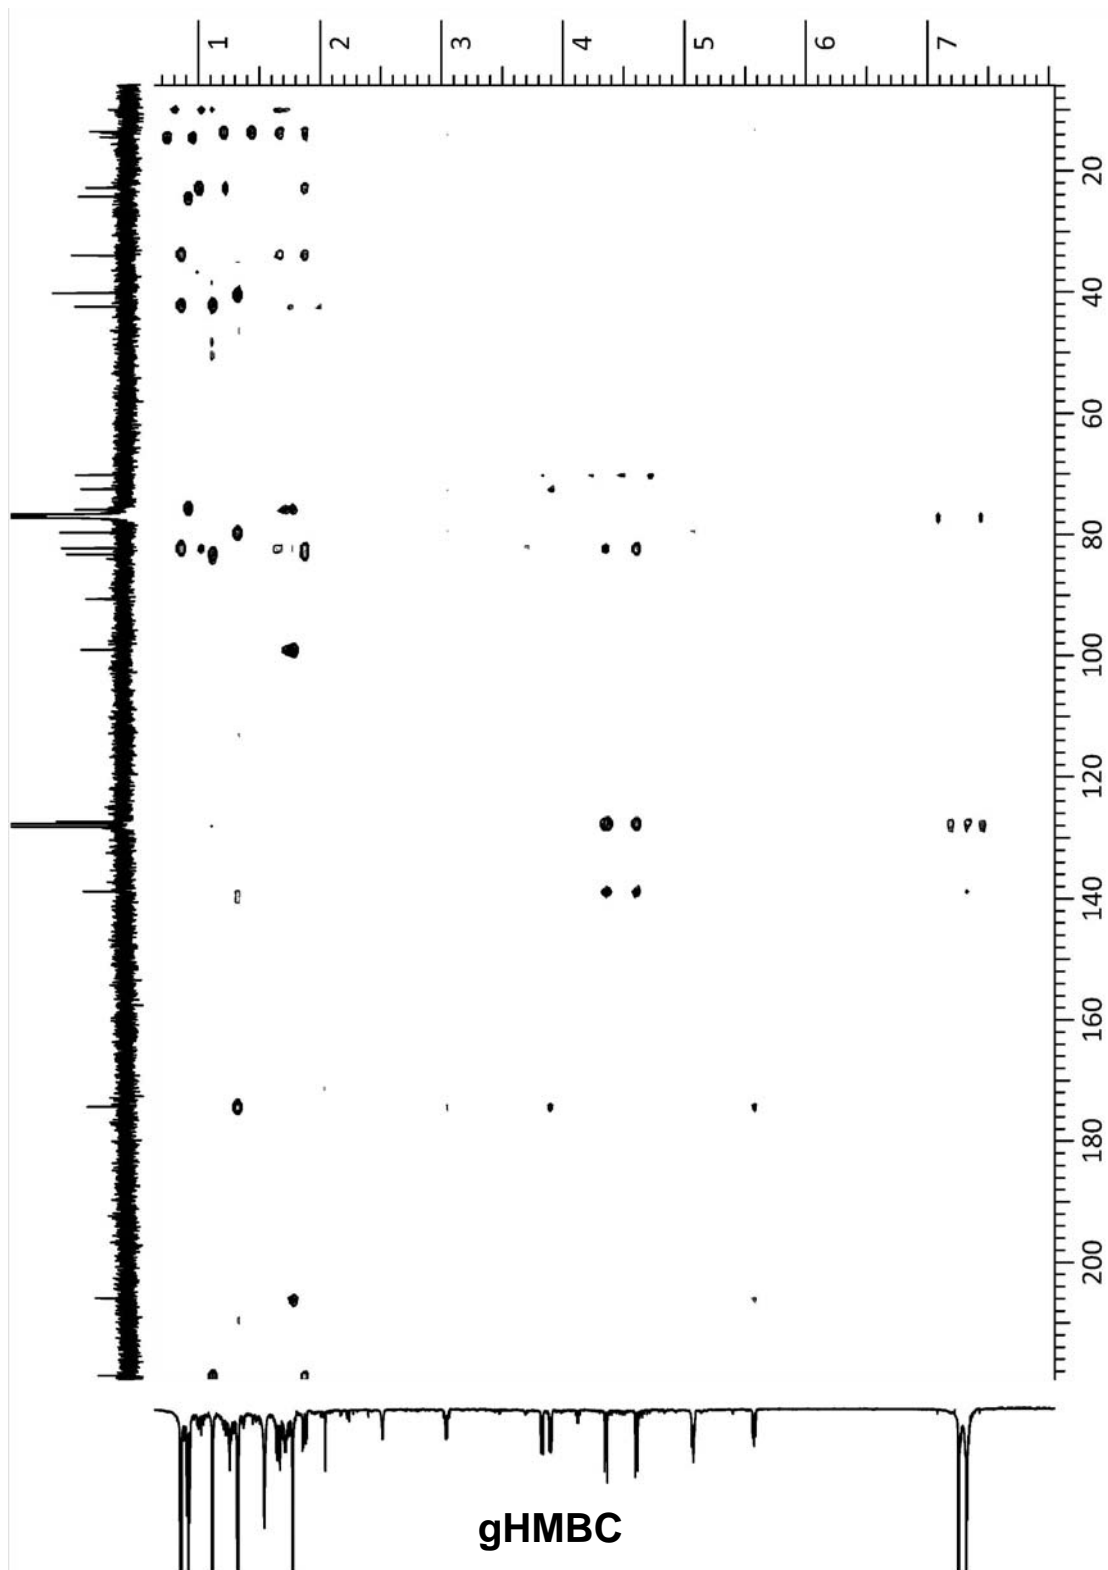



<sup>13</sup>C NMR (125MHz, CDCl<sub>3</sub>)

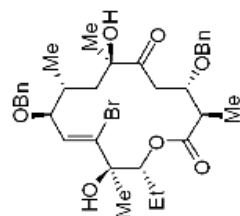

21

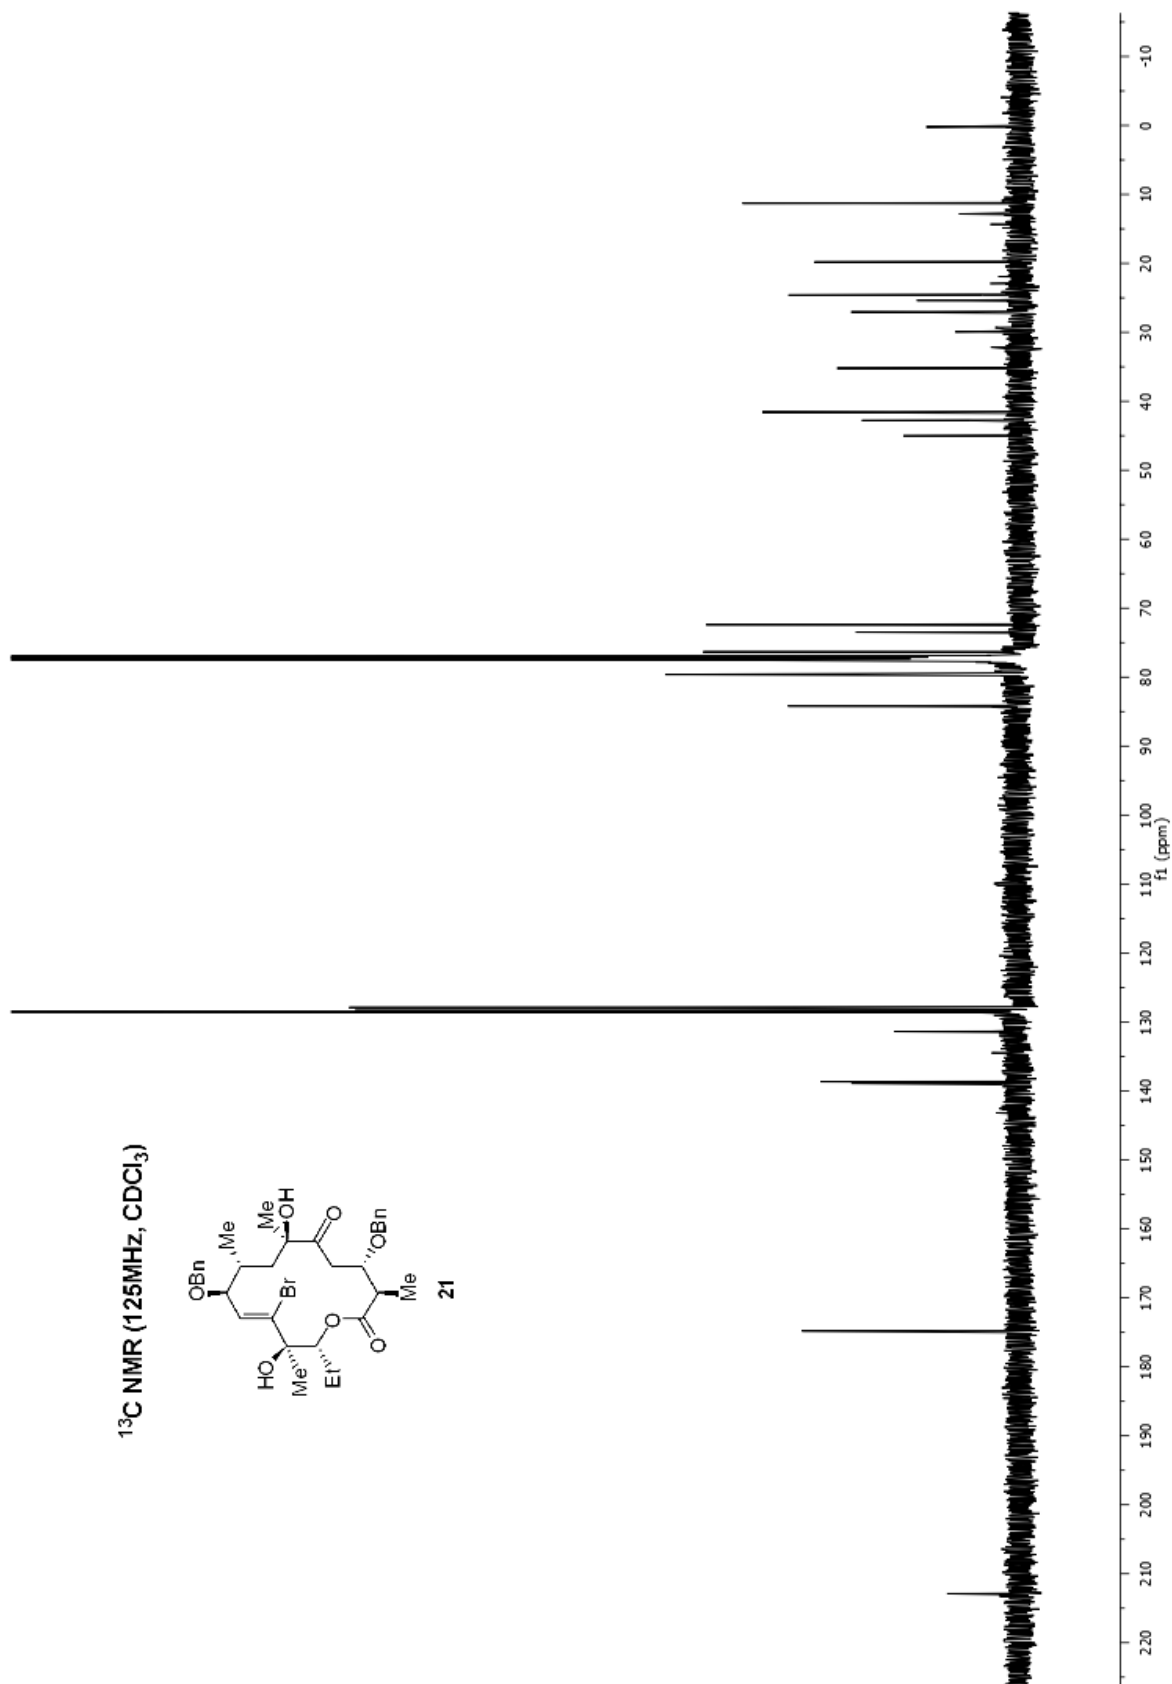

1D TOCSY, NOSEY, and gHMBC of compound 21

1D TOCSY

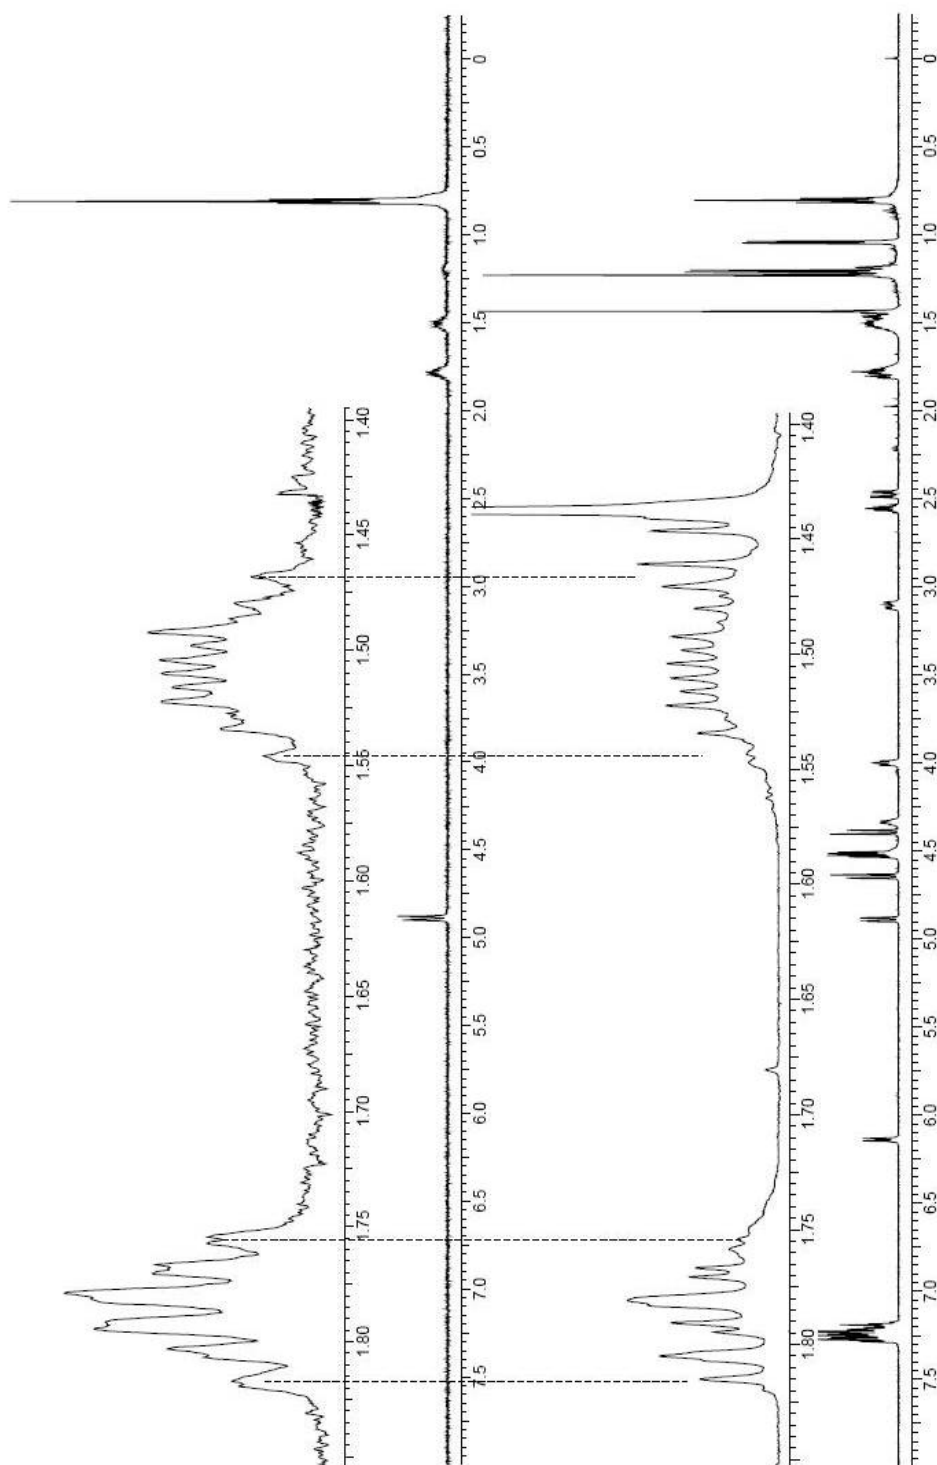



## 1D TOCSY

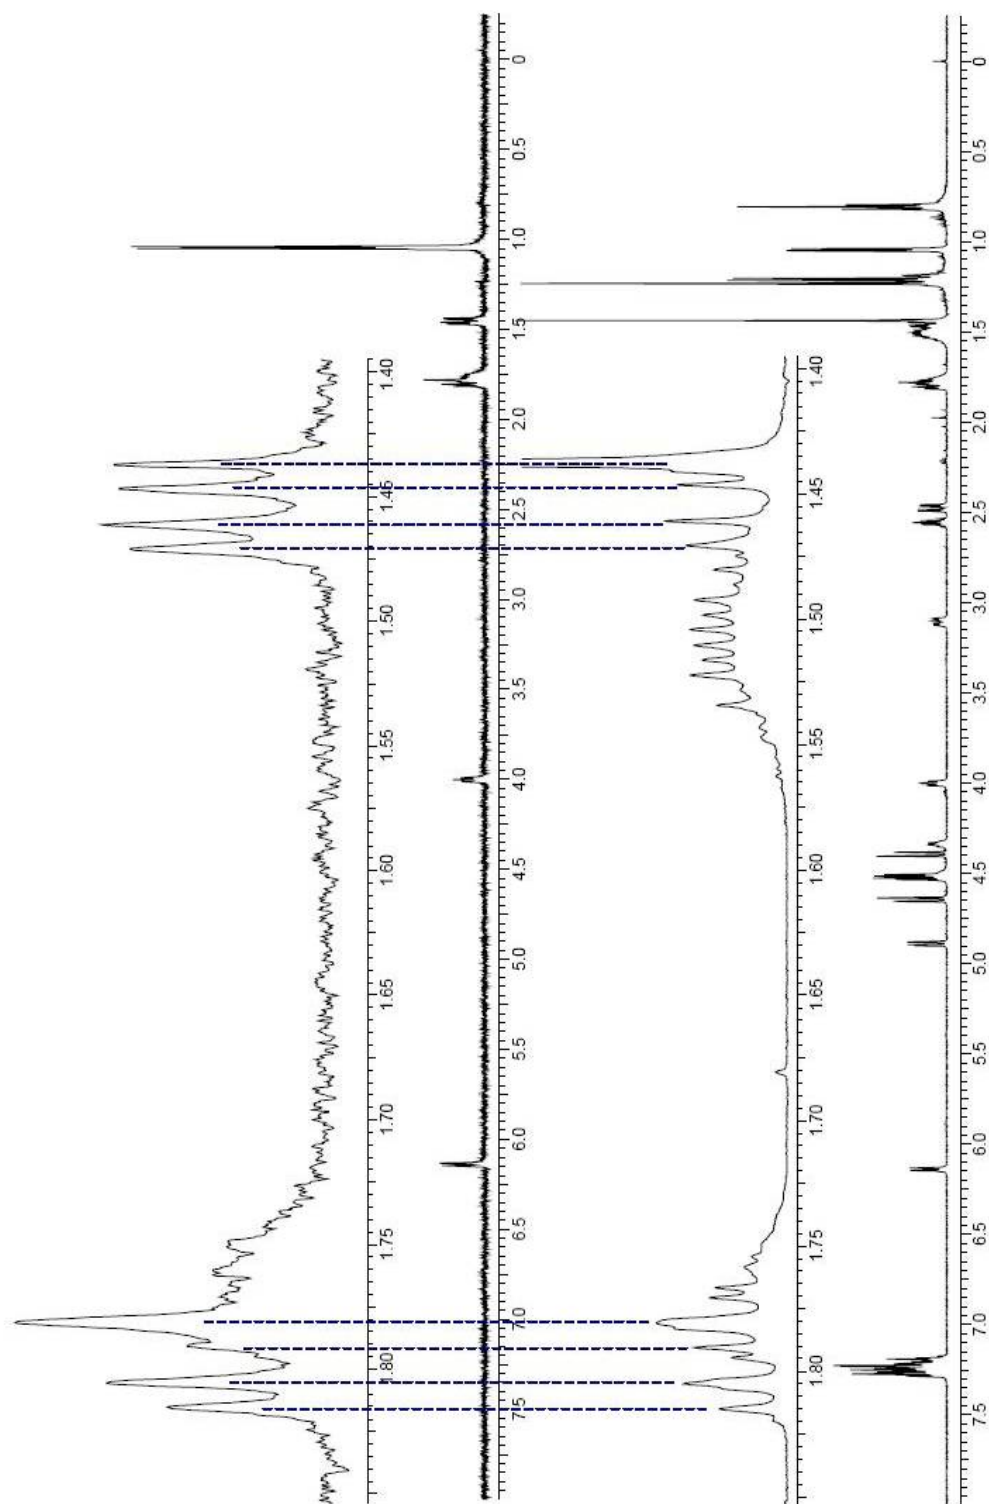

## 1D TOCSY

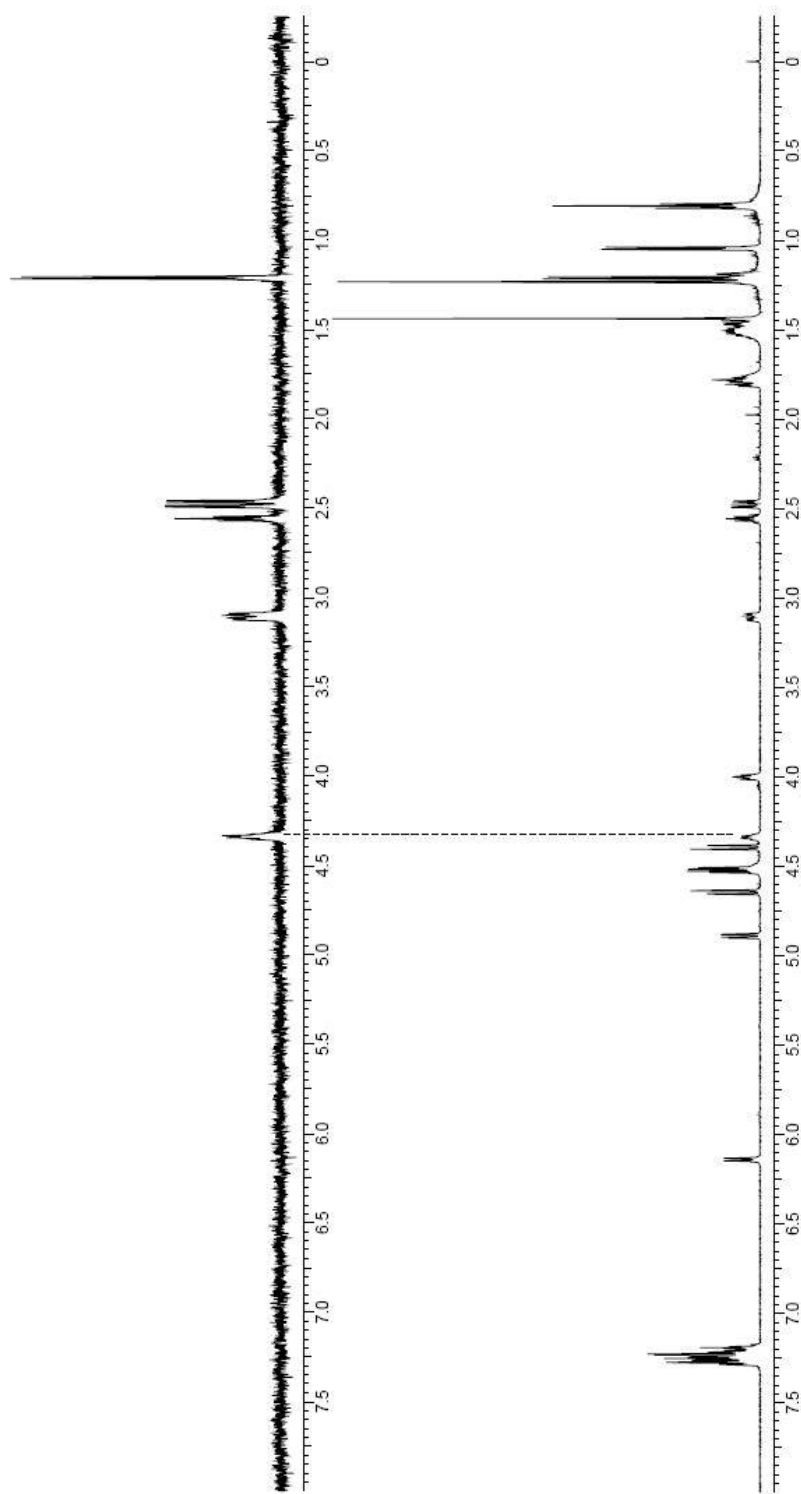

# NOESY

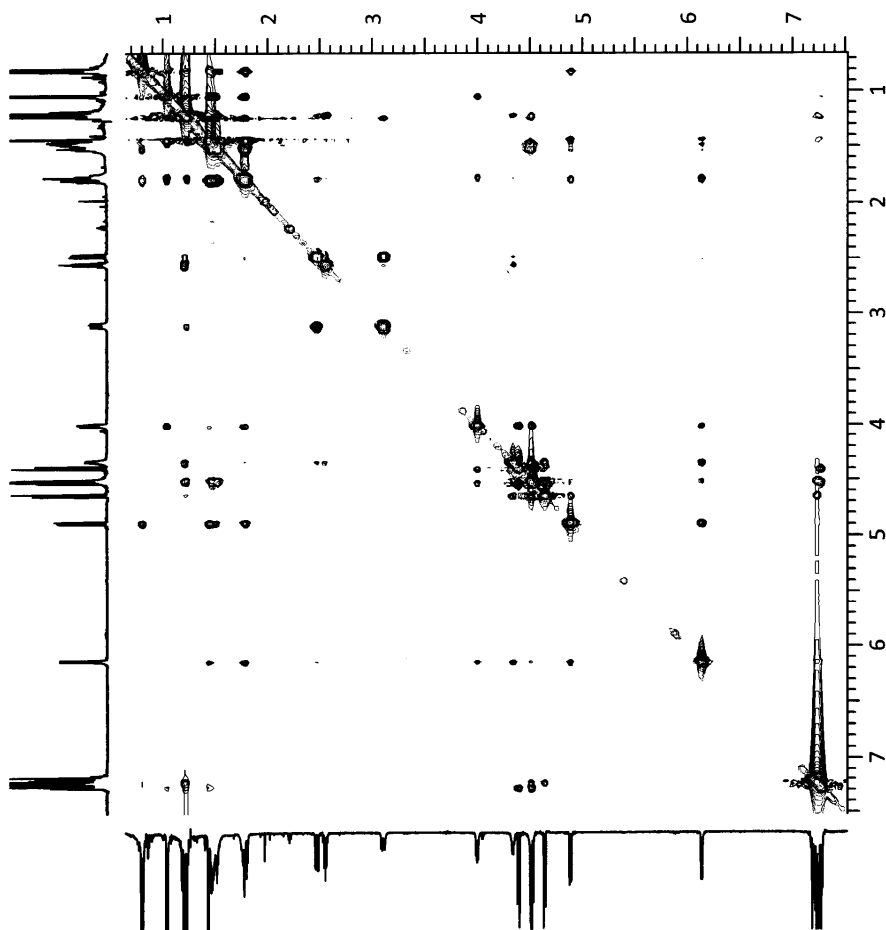

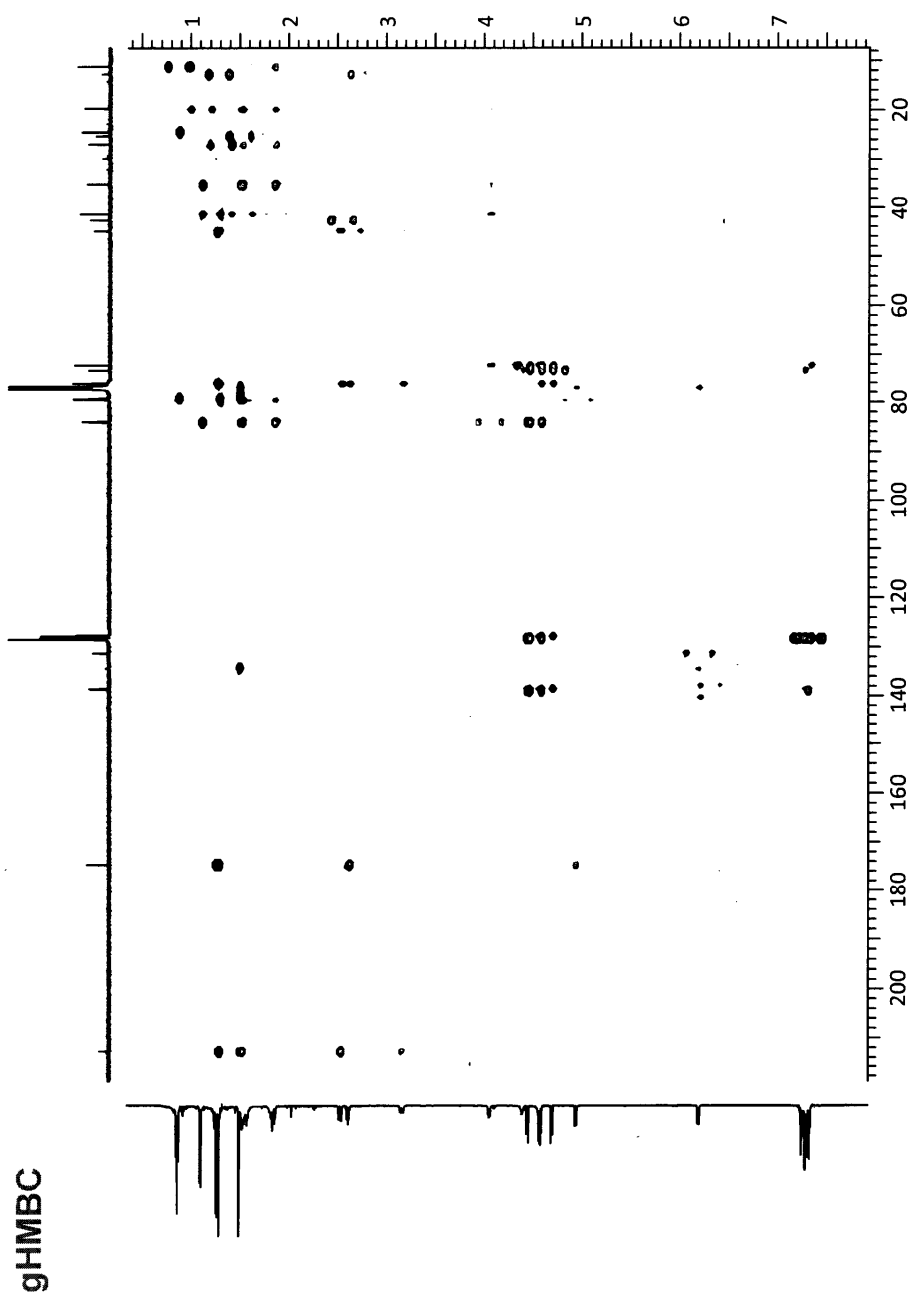

<sup>1</sup>H NMR (500MHz, CDCl<sub>3</sub>)

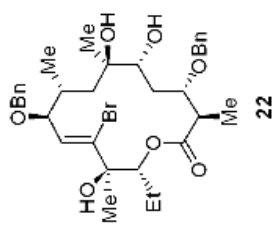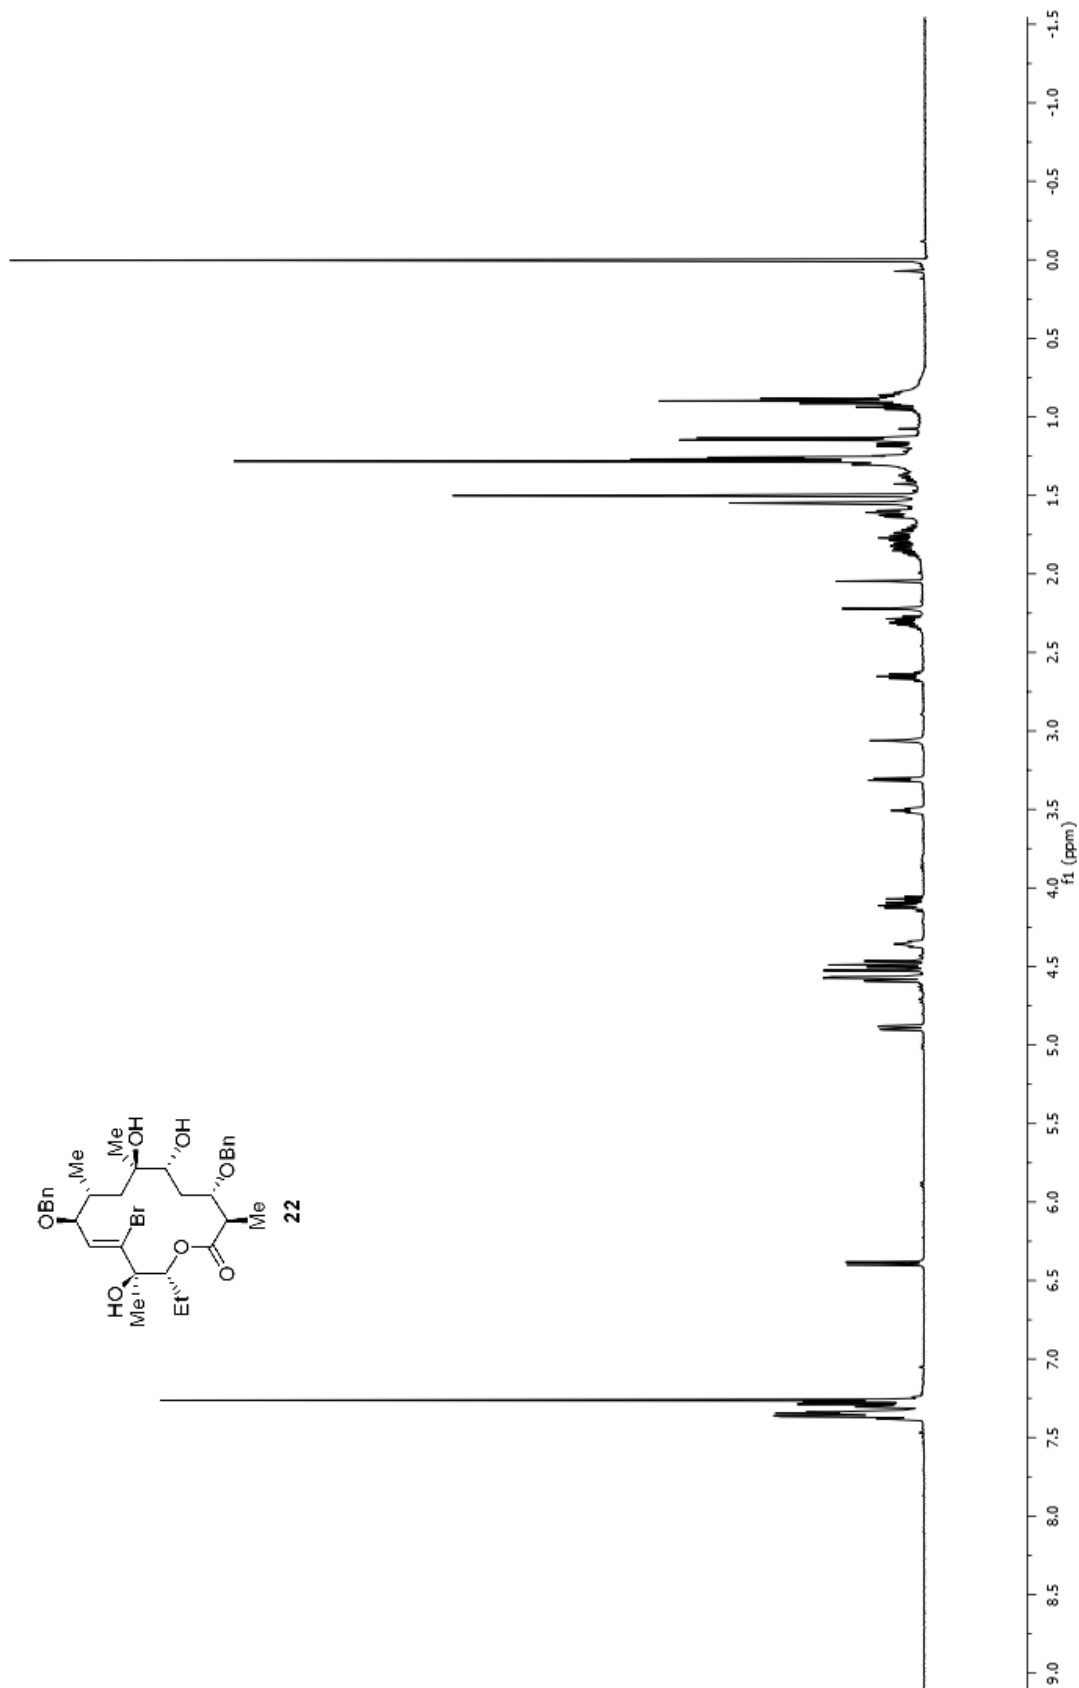

$^{13}\text{C}$  NMR (125MHz,  $\text{CDCl}_3$ )

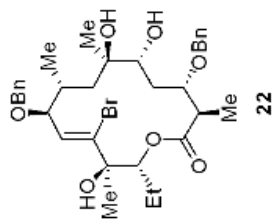

22

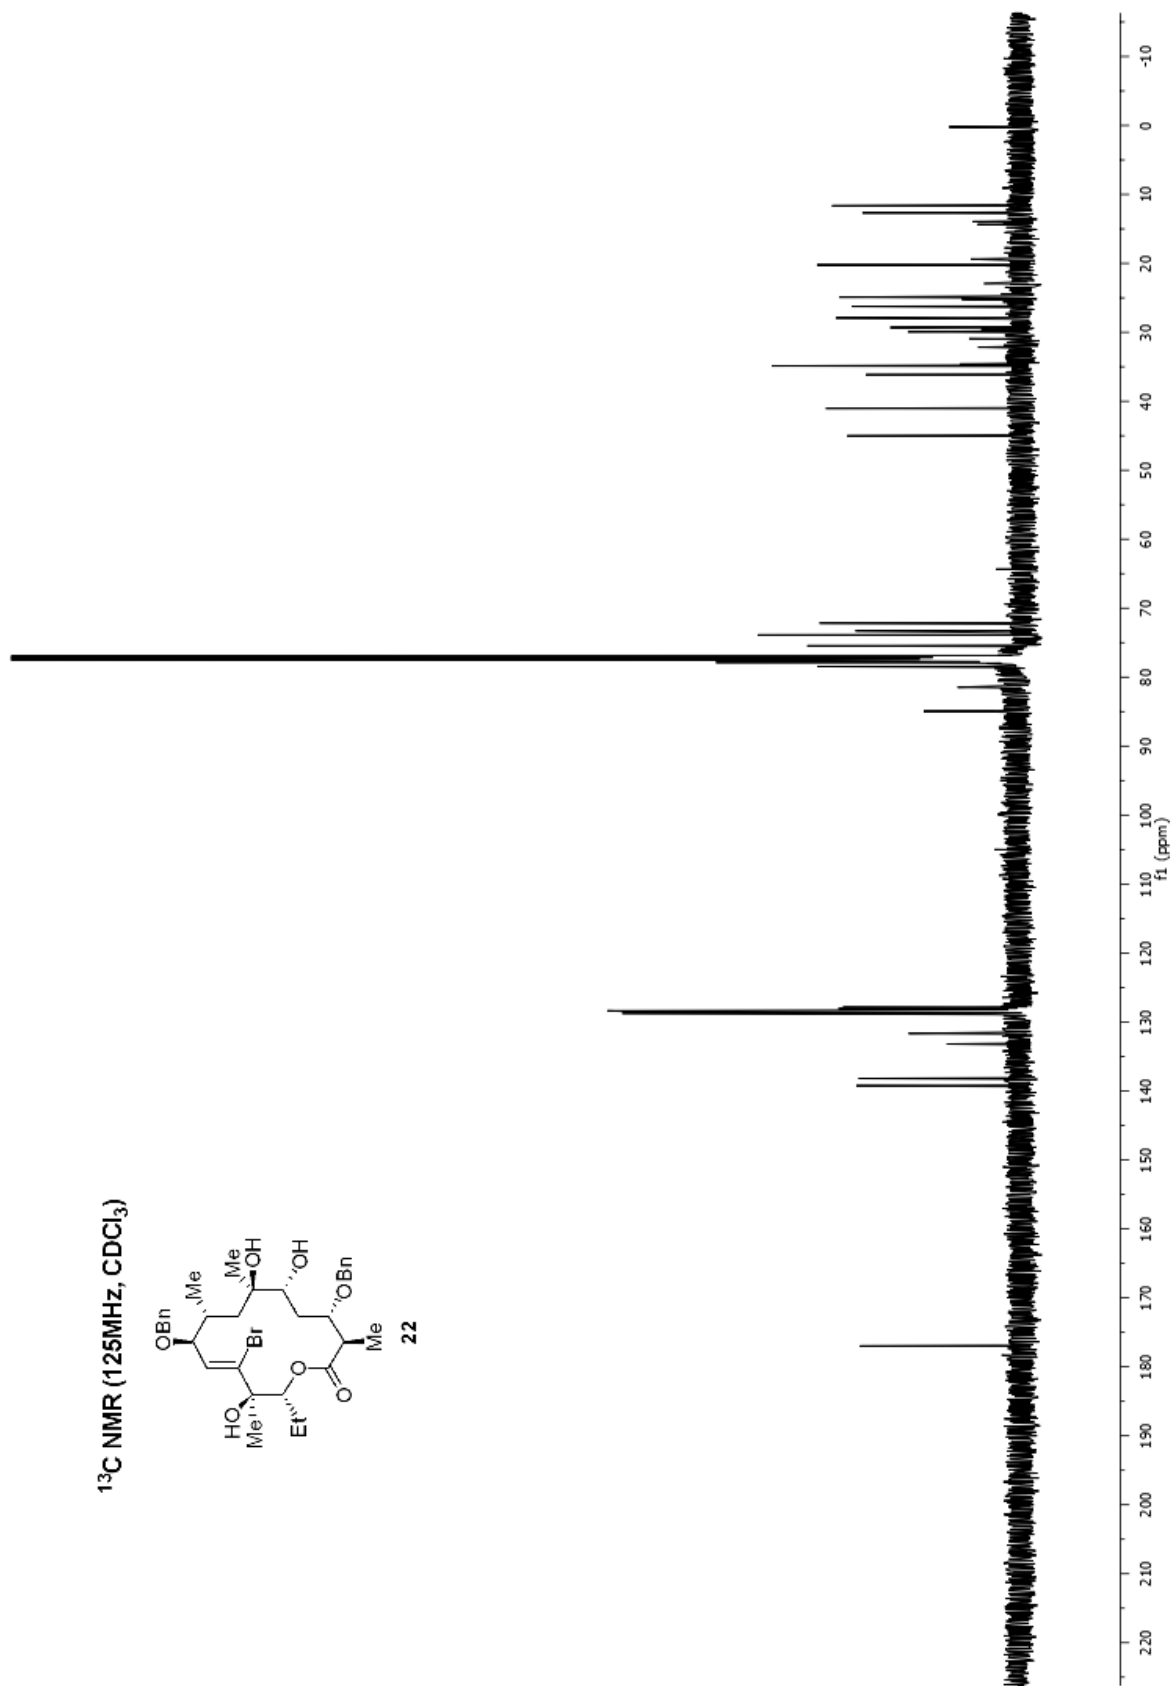

gCOSY, NOSEY, and gHMBC of compound 22

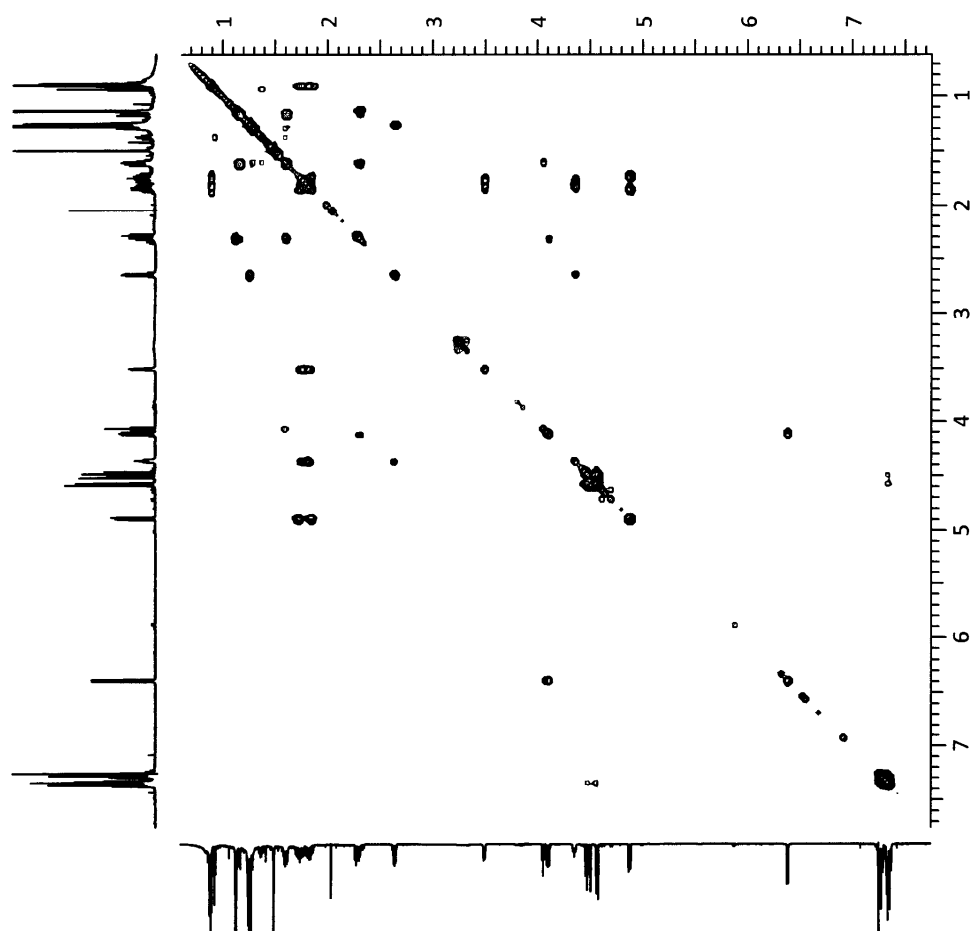

gCOSY

# NOESY

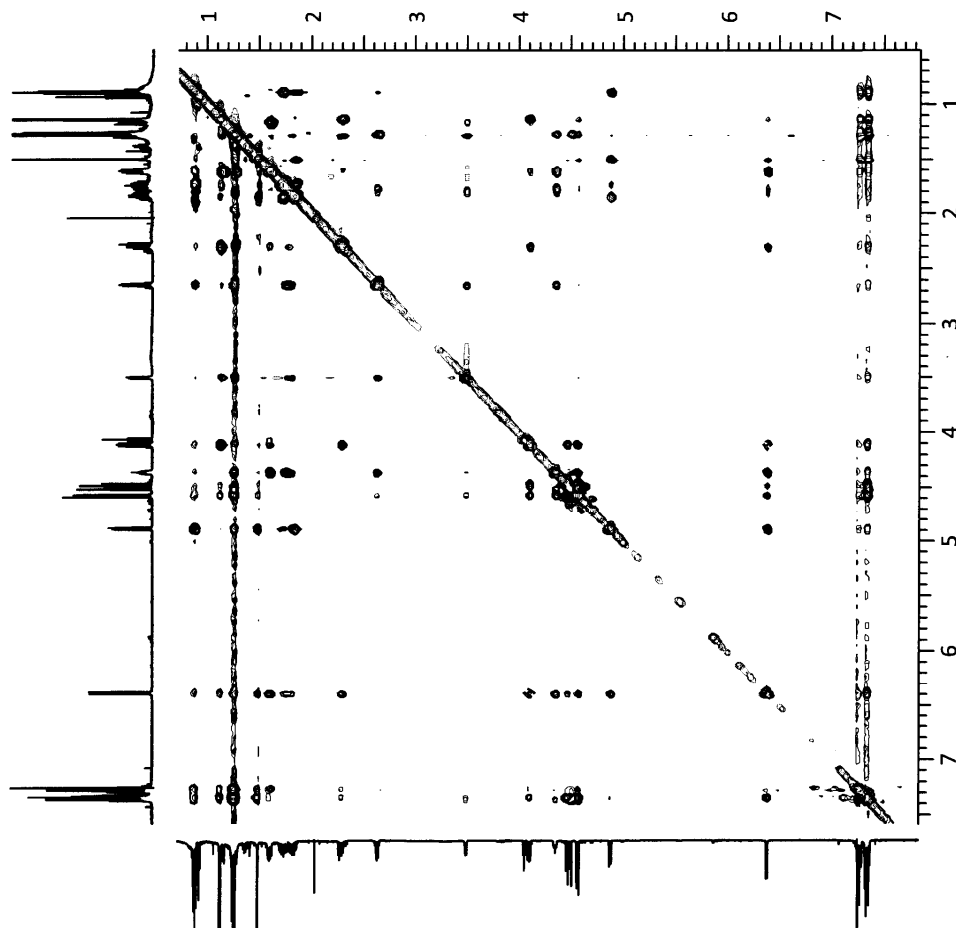



gHMBC

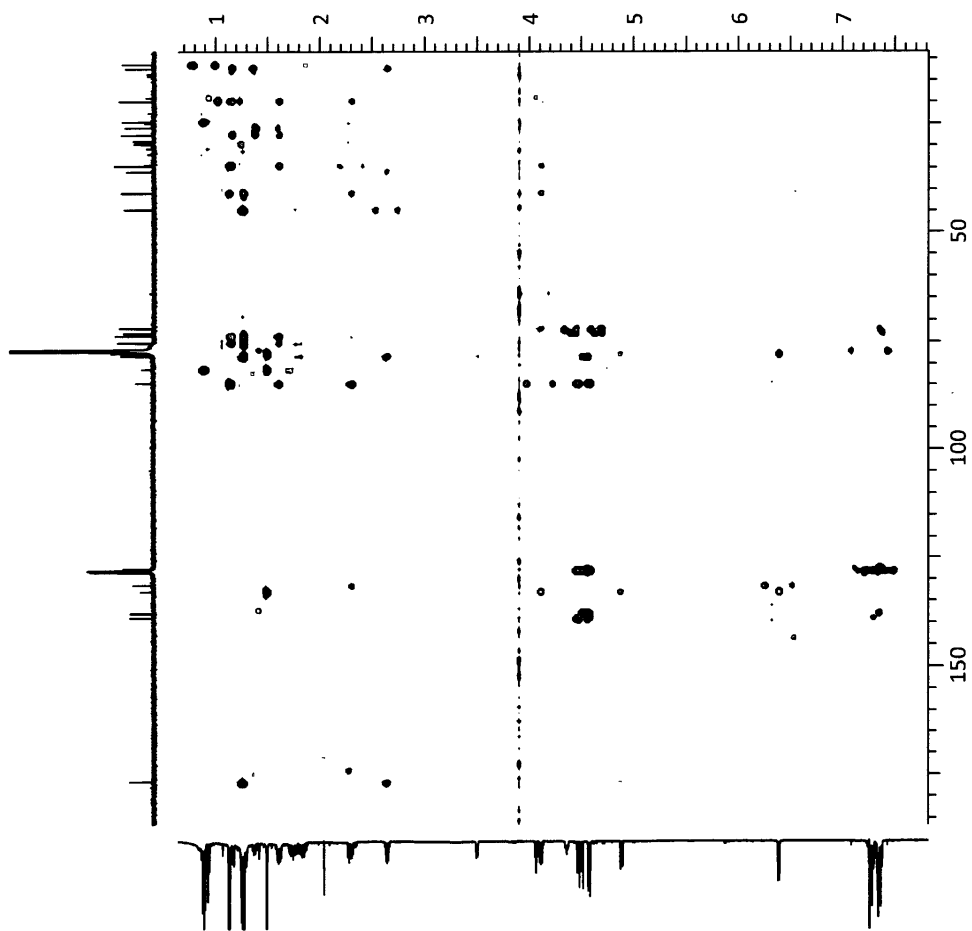

Crystal structure of compound 18

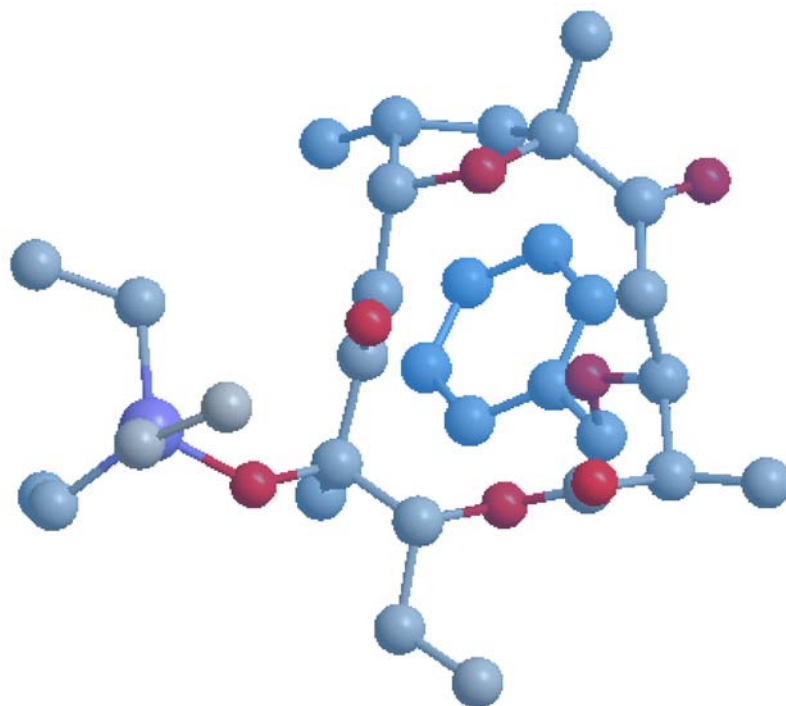

Crystal structure of compound 18 (From different angle)

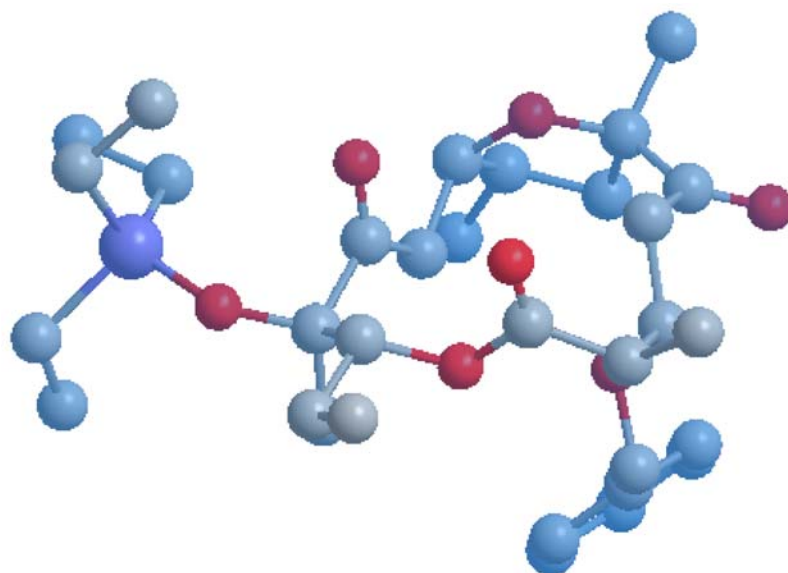

## Ellipsoid plot of compound 18

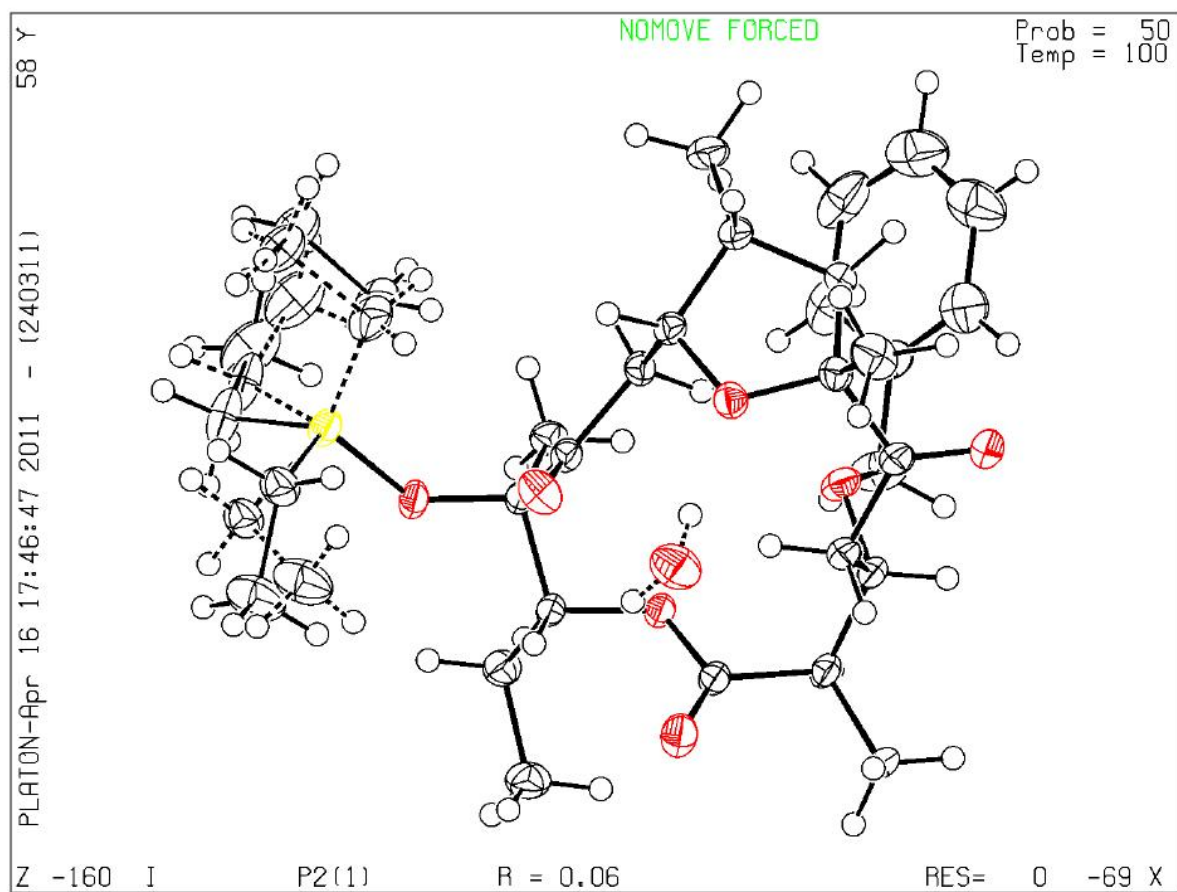

See .cif file for compound coordinates

## Full list of authors in reference **6i-6k**

6i) Woodward, R. B.; Logusch, E.; Nambiar, K. P.; Sakan, K.; Ward, D. E.; Au-Yeung, B.-W.; Balaram, P.; Browne, L. J.; Card, P. J.; Chen, C. H.; Chenevert, R. B.; Fliri, A.; Frobel, K.; Gais, H.-J.; Garratt, D. G.; Hayakawa, K.; Heggie, W.; Hesson, D. P.; Hoppe, D.; Hoppe, I.; Hyatt, J. A.; Ikeda, D.; Jacobi, P. A.; Kim, K. S.; Kobuke, Y.; Kojima, K.; Krowicki, K.; Lee, V. J.; Leutert, T.; Malchenko, S.; Martens, J.; Matthews, R. S.; Ong, B. S.; Press, J. B.; Rajan Babu, T. V.; Rousseau, G.; Sauter, H. M.; Suzuki, M.; Tatsuta, K.; Tolbert, L. M.; Truesdale, E. A.; Uchida, I.; Ueda, Y.; Uyehara, T.; Vasella, A. T.; Vladuchick, W. C.; Wade, P. A.; Williams, R. M.; Wong, H. N.-C. *J. Am. Chem. Soc.* **1981**, *103*, 3210

6j) Woodward, R. B.; Logusch, E.; Nambiar, K. P.; Sakan, K.; Ward, D. E.; Au-Yeung, B.-W.; Balaram, P.; Browne, L. J.; Card, P. J.; Chen, C. H.; Chenevert, R. B.; Fliri, A.; Frobel, K.; Gais, H.-J.; Garratt, D. G.; Hayakawa, K.; Heggie, W.; Hesson, D. P.; Hoppe, D.; Hoppe, I.; Hyatt, J. A.; Ikeda, D.; Jacobi, P. A.; Kim, K. S.; Kobuke, Y.; Kojima, K.; Krowicki, K.; Lee, V. J.; Leutert, T.; Malchenko, S.; Martens, J.; Matthews, R. S.; Ong, B. S.; Press, J. B.; Rajan Babu, T. V.; Rousseau, G.; Sauter, H. M.; Suzuki, M.; Tatsuta, K.; Tolbert, L. M.; Truesdale, E. A.; Uchida, I.; Ueda, Y.; Uyehara, T.; Vasella, A. T.; Vladuchick, W. C.; Wade, P. A.; Williams, R. M.; Wong, H. N.-C. *J. Am. Chem. Soc.* **1981**, *103*, 3213

6k) Woodward, R. B.; Logusch, E.; Nambiar, K. P.; Sakan, K.; Ward, D. E.; Au-Yeung, B.-W.; Balaram, P.; Browne, L. J.; Card, P. J.; Chen, C. H.; Chenevert, R. B.; Fliri, A.; Frobel, K.; Gais, H.-J.; Garratt, D. G.; Hayakawa, K.; Heggie, W.; Hesson, D. P.; Hoppe, D.; Hoppe, I.; Hyatt, J. A.; Ikeda, D.; Jacobi, P. A.; Kim, K. S.; Kobuke, Y.; Kojima, K.; Krowicki, K.; Lee, V. J.; Leutert, T.; Malchenko, S.; Martens, J.; Matthews, R. S.; Ong, B. S.; Press, J. B.; Rajan Babu, T. V.; Rousseau, G.; Sauter, H. M.; Suzuki, M.; Tatsuta, K.; Tolbert, L. M.; Truesdale, E. A.; Uchida, I.; Ueda, Y.; Uyehara, T.; Vasella, A. T.; Vladuchick, W. C.; Wade, P. A.; Williams, R. M.; Wong, H. N.-C. *J. Am. Chem. Soc.* **1981**, *103*, 3215
